# Supplementary material for: Effect of exercise for depression: systematic review and network meta-analysis of randomised controlled trials
Source: PubMed Central journal article supplement — BMJ. 2024 Feb 14;384:e075847. doi: 10.1136/bmj-2023-075847 (PMC10870815; doi:10.1136/bmj-2023-075847), 2024-02-14

**Exercise for depression: A systematic review and network meta-analysis of randomised controlled trials  
Supplementary Files**

**Table of Contents**

|                                                                                                                                     |                  |
|-------------------------------------------------------------------------------------------------------------------------------------|------------------|
| <b><i>S0-PRISMA NMA Checklist of Items to Include When Reporting A Systematic Review Involving a Network Meta-analysis.....</i></b> | <b><i>2</i></b>  |
| <b><i>S1 - Search Strategy.....</i></b>                                                                                             | <b><i>6</i></b>  |
| Cochrane Central Register of Controlled Trials (CENTRAL).....                                                                       | 6                |
| MEDLINE.....                                                                                                                        | 6                |
| EMBASE.....                                                                                                                         | 7                |
| PsycINFO .....                                                                                                                      | 7                |
| SPORTdiscus via EBSCO .....                                                                                                         | 7                |
| <b><i>S2 Consensus reasons for exclusion.....</i></b>                                                                               | <b><i>1</i></b>  |
| <b><i>S3 Characteristics of Included Studies.....</i></b>                                                                           | <b><i>1</i></b>  |
| <b><i>S4 Characteristics of treatments meeting participant threshold .....</i></b>                                                  | <b><i>36</i></b> |
| <b><i>S5 Risk of bias ratings for individual studies .....</i></b>                                                                  | <b><i>40</i></b> |
| <b><i>S6 Sensitivity Analyses for Risk of Bias.....</i></b>                                                                         | <b><i>49</i></b> |
| <b><i>S7 Forest plot of each data point informing each arm.....</i></b>                                                             | <b><i>50</i></b> |
| <b><i>S8 Acceptability by treatment arm .....</i></b>                                                                               | <b><i>51</i></b> |
| <b><i>S9 Density plots for R<sup>2</sup> from models with interactions between treatment and moderators .....</i></b>               | <b><i>52</i></b> |
| <b><i>S10 Weekly dose in METs has limited prediction on outcomes .....</i></b>                                                      | <b><i>53</i></b> |
| <b><i>S11 Moderation for intervention effects by length of intervention in weeks .....</i></b>                                      | <b><i>54</i></b> |
| <b><i>S12 Moderation for intervention effects by measurement lag.....</i></b>                                                       | <b><i>55</i></b> |
| <b><i>S13 Behaviour Change Techniques of Each Exercise Arm.....</i></b>                                                             | <b><i>56</i></b> |
| <b><i>S14 Moderation for level of autonomy described in the method.....</i></b>                                                     | <b><i>57</i></b> |
| <b><i>S15 Moderation by group exercise.....</i></b>                                                                                 | <b><i>58</i></b> |
| <b><i>S16 Funnel plot for all exercise arms vs active control.....</i></b>                                                          | <b><i>59</i></b> |

**S0–PRISMA NMA Checklist of Items to Include When Reporting A Systematic Review Involving a Network Meta-analysis**

| Section/Topic             | Item # | Checklist Item                                                                                                                                                                                                                                                                                                                                                                                                                                                                                                                                                                                                                                                                                                                                                                                     | Reported on Page # |
|---------------------------|--------|----------------------------------------------------------------------------------------------------------------------------------------------------------------------------------------------------------------------------------------------------------------------------------------------------------------------------------------------------------------------------------------------------------------------------------------------------------------------------------------------------------------------------------------------------------------------------------------------------------------------------------------------------------------------------------------------------------------------------------------------------------------------------------------------------|--------------------|
| <b>TITLE</b>              |        |                                                                                                                                                                                                                                                                                                                                                                                                                                                                                                                                                                                                                                                                                                                                                                                                    |                    |
| Title                     | 1      | Identify the report as a systematic review <i>incorporating a network meta-analysis (or related form of meta-analysis)</i> .                                                                                                                                                                                                                                                                                                                                                                                                                                                                                                                                                                                                                                                                       | 1                  |
| <b>ABSTRACT</b>           |        |                                                                                                                                                                                                                                                                                                                                                                                                                                                                                                                                                                                                                                                                                                                                                                                                    |                    |
| Structured summary        | 2      | Provide a structured summary including, as applicable:<br><b>Background:</b> main objectives<br><b>Methods:</b> data sources; study eligibility criteria, participants, and interventions; study appraisal; and <i>synthesis methods, such as network meta-analysis</i> .<br><b>Results:</b> number of studies and participants identified; summary estimates with corresponding confidence/credible intervals; <i>treatment rankings may also be discussed</i> .<br><i>Authors may choose to summarize pairwise comparisons against a chosen treatment included in their analyses for brevity.</i><br><b>Discussion/Conclusions:</b> limitations; conclusions and implications of findings.<br><b>Other:</b> primary source of funding; systematic review registration number with registry name. | 2                  |
| <b>INTRODUCTION</b>       |        |                                                                                                                                                                                                                                                                                                                                                                                                                                                                                                                                                                                                                                                                                                                                                                                                    |                    |
| Rationale                 | 3      | Describe the rationale for the review in the context of what is already known, <i>including mention of why a network meta-analysis has been conducted</i> .                                                                                                                                                                                                                                                                                                                                                                                                                                                                                                                                                                                                                                        | 4                  |
| Objectives                | 4      | Provide an explicit statement of questions being addressed, with reference to participants, interventions, comparisons, outcomes, and study design (PICOS).                                                                                                                                                                                                                                                                                                                                                                                                                                                                                                                                                                                                                                        | 4                  |
| <b>METHODS</b>            |        |                                                                                                                                                                                                                                                                                                                                                                                                                                                                                                                                                                                                                                                                                                                                                                                                    |                    |
| Protocol and registration | 5      | Indicate whether a review protocol exists and if and where it can be accessed (e.g., Web address); and, if available, provide registration information, including registration number.                                                                                                                                                                                                                                                                                                                                                                                                                                                                                                                                                                                                             | 5                  |
| Eligibility criteria      | 6      | Specify study characteristics (e.g., PICOS, length of follow-up) and report characteristics (e.g., years considered, language, publication status) used as criteria for eligibility, giving rationale. <i>Clearly describe eligible treatments included in the treatment network, and note whether any have been clustered or merged into the same node (with justification)</i> .                                                                                                                                                                                                                                                                                                                                                                                                                 | 5                  |

|                                        |           |                                                                                                                                                                                                                                                                                                                                                                                                                                 |     |
|----------------------------------------|-----------|---------------------------------------------------------------------------------------------------------------------------------------------------------------------------------------------------------------------------------------------------------------------------------------------------------------------------------------------------------------------------------------------------------------------------------|-----|
| Information sources                    | 7         | Describe all information sources (e.g., databases with dates of coverage, contact with study authors to identify additional studies) in the search and date last searched.                                                                                                                                                                                                                                                      | 5   |
| Search                                 | 8         | Present full electronic search strategy for at least one database, including any limits used, such that it could be repeated.                                                                                                                                                                                                                                                                                                   | 5   |
| Study selection                        | 9         | State the process for selecting studies (i.e., screening, eligibility, included in systematic review, and, if applicable, included in the meta-analysis).                                                                                                                                                                                                                                                                       | 5   |
| Data collection process                | 10        | Describe method of data extraction from reports (e.g., piloted forms, independently, in duplicate) and any processes for obtaining and confirming data from investigators.                                                                                                                                                                                                                                                      | 5   |
| Data items                             | 11        | List and define all variables for which data were sought (e.g., PICOS, funding sources) and any assumptions and simplifications made.                                                                                                                                                                                                                                                                                           | 5-6 |
| <b>Geometry of the network</b>         | <b>S1</b> | Describe methods used to explore the geometry of the treatment network under study and potential biases related to it. This should include how the evidence base has been graphically summarized for presentation, and what characteristics were compiled and used to describe the evidence base to readers.                                                                                                                    | 7   |
| Risk of bias within individual studies | 12        | Describe methods used for assessing risk of bias of individual studies (including specification of whether this was done at the study or outcome level), and how this information is to be used in any data synthesis.                                                                                                                                                                                                          | 6   |
| Summary measures                       | 13        | State the principal summary measures (e.g., risk ratio, difference in means). <i>Also describe the use of additional summary measures assessed, such as treatment rankings and surface under the cumulative ranking curve (SUCRA) values, as well as modified approaches used to present summary findings from meta-analyses.</i>                                                                                               | 6   |
| Planned methods of analysis            | 14        | Describe the methods of handling data and combining results of studies for each network meta-analysis. This should include, but not be limited to: <ul style="list-style-type: none"> <li>• <i>Handling of multi-arm trials;</i></li> <li>• <i>Selection of variance structure;</i></li> <li>• <i>Selection of prior distributions in Bayesian analyses;</i></li> <li>and</li> <li>• <i>Assessment of model fit.</i></li> </ul> | 6   |
| <b>Assessment of Inconsistency</b>     | <b>S2</b> | Describe the statistical methods used to evaluate the agreement of direct and indirect evidence in the treatment network(s) studied. Describe efforts taken to address its presence when found.                                                                                                                                                                                                                                 | 7   |
| Risk of bias across studies            | 15        | Specify any assessment of risk of bias that may affect the cumulative evidence (e.g., publication bias, selective reporting within studies).                                                                                                                                                                                                                                                                                    | 7   |
| Additional analyses                    | 16        | Describe methods of additional analyses if done, indicating which were pre-specified. This may include, but not be limited to, the following: <ul style="list-style-type: none"> <li>• Sensitivity or subgroup analyses;</li> </ul>                                                                                                                                                                                             | 6-7 |

- Meta-regression analyses;
- *Alternative formulations of the treatment network; and*
- *Use of alternative prior distributions for Bayesian analyses (if applicable).*

## RESULTS†

|                                          |           |                                                                                                                                                                                                                                                                                                                                                                                                                                                              |        |
|------------------------------------------|-----------|--------------------------------------------------------------------------------------------------------------------------------------------------------------------------------------------------------------------------------------------------------------------------------------------------------------------------------------------------------------------------------------------------------------------------------------------------------------|--------|
| Study selection                          | 17        | Give numbers of studies screened, assessed for eligibility, and included in the review, with reasons for exclusions at each stage, ideally with a flow diagram.                                                                                                                                                                                                                                                                                              | 8      |
| <b>Presentation of network structure</b> | <b>S3</b> | Provide a network graph of the included studies to enable visualization of the geometry of the treatment network.                                                                                                                                                                                                                                                                                                                                            | 9      |
| <b>Summary of network geometry</b>       | <b>S4</b> | Provide a brief overview of characteristics of the treatment network. This may include commentary on the abundance of trials and randomized patients for the different interventions and pairwise comparisons in the network, gaps of evidence in the treatment network, and potential biases reflected by the network structure.                                                                                                                            | 9      |
| Study characteristics                    | 18        | For each study, present characteristics for which data were extracted (e.g., study size, PICOS, follow-up period) and provide the citations.                                                                                                                                                                                                                                                                                                                 | S2     |
| Risk of bias within studies              | 19        | Present data on risk of bias of each study and, if available, any outcome level assessment.                                                                                                                                                                                                                                                                                                                                                                  | 10, S4 |
| Results of individual studies            | 20        | For all outcomes considered (benefits or harms), present, for each study: 1) simple summary data for each intervention group, and 2) effect estimates and confidence intervals. <i>Modified approaches may be needed to deal with information from larger networks.</i>                                                                                                                                                                                      | S6     |
| Synthesis of results                     | 21        | Present results of each meta-analysis done, including confidence/credible intervals. <i>In larger networks, authors may focus on comparisons versus a particular comparator (e.g. placebo or standard care), with full findings presented in an appendix. League tables and forest plots may be considered to summarize pairwise comparisons.</i> If additional summary measures were explored (such as treatment rankings), these should also be presented. | 11     |
| <b>Exploration for inconsistency</b>     | <b>S5</b> | Describe results from investigations of inconsistency. This may include such information as measures of model fit to compare consistency and inconsistency models, <i>P</i> values from statistical tests, or summary of inconsistency estimates from different parts of the treatment network.                                                                                                                                                              | 12     |
| Risk of bias across studies              | 22        | Present results of any assessment of risk of bias across studies for the evidence base being studied.                                                                                                                                                                                                                                                                                                                                                        | 14     |

|                                |    |                                                                                                                                                                                                                                                                                                                                                                                                                                |       |
|--------------------------------|----|--------------------------------------------------------------------------------------------------------------------------------------------------------------------------------------------------------------------------------------------------------------------------------------------------------------------------------------------------------------------------------------------------------------------------------|-------|
| Results of additional analyses | 23 | Give results of additional analyses, if done (e.g., sensitivity or subgroup analyses, meta-regression analyses, <i>alternative network geometries studied, alternative choice of prior distributions for Bayesian analyses</i> , and so forth).                                                                                                                                                                                | 13-14 |
| <b>DISCUSSION</b>              |    |                                                                                                                                                                                                                                                                                                                                                                                                                                |       |
| Summary of evidence            | 24 | Summarize the main findings, including the strength of evidence for each main outcome; consider their relevance to key groups (e.g., healthcare providers, users, and policy-makers).                                                                                                                                                                                                                                          | 15    |
| Limitations                    | 25 | Discuss limitations at study and outcome level (e.g., risk of bias), and at review level (e.g., incomplete retrieval of identified research, reporting bias). <i>Comment on the validity of the assumptions, such as transitivity and consistency. Comment on any concerns regarding network geometry (e.g., avoidance of certain comparisons).</i>                                                                            | 16-17 |
| Conclusions                    | 26 | Provide a general interpretation of the results in the context of other evidence, and implications for future research.                                                                                                                                                                                                                                                                                                        | 17-18 |
| <b>FUNDING</b>                 |    |                                                                                                                                                                                                                                                                                                                                                                                                                                |       |
| Funding                        | 27 | Describe sources of funding for the systematic review and other support (e.g., supply of data); role of funders for the systematic review. This should also include information regarding whether funding has been received from manufacturers of treatments in the network and/or whether some of the authors are content experts with professional conflicts of interest that could affect use of treatments in the network. | 18    |

PICOS = population, intervention, comparators, outcomes, study design.

\* Text in italics indicates wording specific to reporting of network meta-analyses that has been added to guidance from the PRISMA statement.

† Authors may wish to plan for use of appendices to present all relevant information in full detail for items in this section.

## S1 - Search Strategy

*We replicated the search from the most recent Cochrane review,<sup>21</sup> adding keywords for yoga, tai-chi, and qigong, because we judged them to meet our definition of 'exercise'.*

### **Cochrane Central Register of Controlled Trials (CENTRAL)**

CENTRAL was searched using the following terms:

1. MeSH descriptor Exercise explode all trees
2. MeSH descriptor Exercise Therapy explode all trees
3. MeSH descriptor Physical Education and Training explode all trees
4. MeSH descriptor Physical Fitness, this term only
5. MeSH descriptor Physical Exertion, this term only
6. MeSH descriptor Walking explode all trees
7. MeSH descriptor Running explode all trees
8. MeSH descriptor Swimming, this term only
9. (cycling or bicycling or yoga or "tai-chi" or "tai chi" or "tai ji" or qigong or "qi gong")
10. (exercise\* or exercising)
11. (physical NEAR/5 (education or training))
12. (#1 OR #2 OR #3 OR #4 OR #5 OR #6 OR #7 OR #8 OR #9 OR #10 OR #11)
13. MeSH descriptor Depressive Disorder explode all trees
14. MeSH descriptor Depression, this term only
15. SR-DEPRESSN
16. HS-DEPRESSN
17. (#13 OR #14 OR #15 OR #16)
18. (#12 AND #17)

### **MEDLINE**

OVID MEDLINE was searched using the following terms:

1. exp Exercise/
2. exp Exercise Therapy/
3. exp "Physical Education and Training"/
4. Physical Fitness/
5. Physical Exertion/
6. exp Walking/
7. Running/ or Jogging/
8. Swimming/ or Yoga/ or Qigong/ or Tai ji/
9. (cycling or bicycling or yoga or "tai-chi" or "tai chi" or "tai ji" or qigong or "qi gong").tw.
10. (exercise\$ or exercising).tw.
11. (physical adj3 (education or training)).tw.
12. or/1-11
13. Depression/
14. exp Depressive Disorder/
15. or/13-14
16. randomized controlled trial.pt.
17. controlled clinical trial.pt.
18. randomly.ab.
19. trial.ab.
20. groups.ab.
21. (control\$ adj3 (trial\$ or study or studies)).tw.
22. randomi#ed.ab.
23. placebo\$.ab.
24. or/16-23
25. 12 and 15 and 24

## EMBASE

OID EMBASE was searched using the following terms (for RCTs, we used [Cochrane's recommended Embase search terms for RCTs, section 2.1.2](#)):

1. exp exercise/
2. exp physical activity/
3. exp sport/
4. (exercise\$ or exercising or yoga or "tai-chi" or "tai chi" or "tai ji" or qigong or "qi gong").tw.
5. or/1-4
6. exp depression/
7. ("crossover procedure" or "double-blind procedure" or "randomized controlled trial" or "single-blind procedure").hw.
8. (random\* or factorial\* or crossover\* or (cross adj1 over\*) or placebo\* or (doubl\* adj1 blind\*) or (singl\* adj1 blind\*) or assign\* or allocat\* or volunteer\*).ab,hw,ti.
9. 7 or 8
10. 5 and 6 and 9

## PsycINFO

OID PsycINFO was searched using the following terms:

1. exp major depression/
2. atypical depression/
3. seasonal affective disorder/
4. (depress\$ adj3 (patient\$ or symptom\$ or disorder\$)).ti,ab.
5. or/1-4
6. exp physical activity/
7. exp sports/
8. running/ or walking/
9. (cycling or bicycling or yoga or "tai-chi" or "tai chi" or "tai ji" or qigong or "qi gong").tw.
10. (exercise\$ or exercising).tw.
11. (physical adj3 (education or training)).tw.
12. or/6-11
13. treatment effectiveness evaluation/
14. clinical trials/
15. mental health program evaluation/
16. placebo/
17. placebo\$.tw.
18. randomly.ab.
19. randomi#ed.tw.
20. trial\$.tw.
21. ((singl\$ or doubl\$ or trebl\$ or tripl\$) adj3 (blind\$ or mask\$ or dummy)).tw.
22. (control\* adj3 (trial\* or study or studies)).tw.
23. or/13-22
24. 5 and 12 and 23

## SPORTdiscus via EBSCO

Using PsycINFO terms for RCTs optimising specificity and [specificity](#)

1. TI(depressi\* OR dysthymi\*)
2. AB(depressi\* OR dysthymi\*)
3. KW(depressi\* OR dysthymi\*)
4. 1 OR 2 OR 3
5. TX(sport\* OR exercis\* OR aerobic\* OR running OR jogging OR walk\* OR hiking OR swim\* OR aquatic\* OR yoga OR "tai-chi" OR "tai chi" OR "tai ji" OR qigong OR "qi gong" OR cycling OR bicycl\* OR ((physical or strength\*) AND (activit\* OR educat\* OR fitness OR train\*)) OR "physical medicine" OR ((resistance or weight\*) AND (train\* or lift\*)))
6. TI("double-blind" OR "random\* assigned" OR control)
7. AB("double-blind" OR "random\* assigned" OR control)

8. KW("double-blind" OR "random\* assigned" OR control)
9. 6 OR 7 OR 8
10. 4 AND 5 AND 9



## **S2 Consensus reasons for exclusion**

<https://osf.io/nzw6u/>

## **S3 Characteristics of Included Studies**

| Country          | Funded | n  | % Female | Mean Age (SD/Range) | Comorbidities | Baseline Depression | Treatment                     | Length (weeks) | Intensity prescribed (METs) | Exercise dose (METs/week) | Timepoints available | Outcomes measured |
|------------------|--------|----|----------|---------------------|---------------|---------------------|-------------------------------|----------------|-----------------------------|---------------------------|----------------------|-------------------|
| Abdelbasset 2019 |        |    |          |                     |               |                     |                               |                |                             |                           |                      |                   |
| Saudi Arabia     | Y      | 23 | 26.0     | NA                  | N             | Moderate            | Usual care                    | 12             | NA                          | NA                        | Post                 | PHQ-9             |
| Saudi Arabia     | Y      | 23 | 26.0     | NA                  | N             | Moderate            | Walking / Jogging             | 12             | 4                           | 452                       | Post                 | PHQ-9             |
| Saudi Arabia     | Y      | 23 | 26.0     | NA                  | N             | Moderate            | Walking / Jogging             | 12             | 5                           | 729                       | Post                 | PHQ-9             |
| Abdelbasset 2020 |        |    |          |                     |               |                     |                               |                |                             |                           |                      |                   |
| Saudi Arabia     | N      | 14 | 50.0     | 52.8 (5.7)          | Y             | Severe              | Usual care                    | NA             | NA                          | NA                        | Post                 | HDRS              |
| Saudi Arabia     | N      | 14 | 42.0     | 53.4 (5.3)          | Y             | Severe              | Proprioceptive exercises      | 8              | 3                           | 378                       | Post                 | HDRS              |
| Abdollahi 2017   |        |    |          |                     |               |                     |                               |                |                             |                           |                      |                   |
| Iran             | N      | 35 | 40.0     | 50.91 (7.43)        | N             | Moderate            | Aerobic + Therapy             | 12             | NA                          | NA                        | Post                 | BDI-II            |
| Iran             | N      | 35 | 54.0     | 48.43 (6.83)        | N             | Moderate            | Cognitive behavioural therapy | 12             | NA                          | NA                        | Post                 | BDI-II            |
| Abedi 2015       |        |    |          |                     |               |                     |                               |                |                             |                           |                      |                   |
| Iran             | Y      | 49 | 100.0    | NA                  | N             | Moderate            | Waitlist control              | 12             | NA                          | NA                        | Post                 | BDI               |
| Iran             | Y      | 48 | 100.0    | NA                  | N             | Moderate            | Walking / Jogging             | 12             | 4                           | 99                        | Post                 | BDI               |
| Abt 2006         |        |    |          |                     |               |                     |                               |                |                             |                           |                      |                   |
| USA              | Y      | 14 | 79.0     | 46.1 (10.1)         | N             | Moderate            | Social                        | 6              | NA                          | NA                        | Post                 | IDS-SR            |
| USA              | Y      | 17 | 65.0     | 46.1 (10.1)         | N             | Moderate            | Aerobic + Strength            | 6              | 10                          | 685                       | Post                 | IDS-SR            |
| Aguinaga 2018    |        |    |          |                     |               |                     |                               |                |                             |                           |                      |                   |

| Country             | Funded | n  | % Female | Mean Age (SD/Range) | Comorbidities | Baseline Depression | Treatment               | Length (weeks) | Intensity prescribed (METs) | Exercise dose (METs/week) | Timepoints available | Outcomes measured |
|---------------------|--------|----|----------|---------------------|---------------|---------------------|-------------------------|----------------|-----------------------------|---------------------------|----------------------|-------------------|
| USA                 | Y      | 24 | 89.0     | 70.25 (3.72)        | N             | Moderate            | Educational             | NA             | NA                          | NA                        | Post                 | HADS              |
| USA                 | Y      | 18 | 84.0     | 69.73 (3.58)        | N             | Moderate            | Strength                | 26             | 4                           | NA                        | Post                 | HADS              |
| Armstrong 2003      |        |    |          |                     |               |                     |                         |                |                             |                           |                      |                   |
| Australia           | N      | 10 | NA       | (21-30)             | N             | Severe              | Waitlist control        | NA             | NA                          | NA                        | Post                 | DASS, EPDS        |
| Australia           | N      | 10 | NA       | (21-30)             | N             | Moderate            | Mixed aerobic exercises | 12             | 5                           | 567                       | Post                 | DASS, EPDS        |
| Armstrong 2004      |        |    |          |                     |               |                     |                         |                |                             |                           |                      |                   |
| Australia           | Y      | 10 | 100.0    | 30 (NA)             | N             | Moderate            | Social                  | NA             | NA                          | NA                        | Post                 | HAM-D             |
| Australia           | Y      | 9  | 100.0    | 30 (NA)             | N             | Moderate            | Walking / Jogging       | 12             | 4                           | 344                       | Post                 | HAM-D             |
| Balchin 2016        |        |    |          |                     |               |                     |                         |                |                             |                           |                      |                   |
| Not reported        | Y      | 10 | 0.0      | 25.4 (NA)           | N             | Moderate            | Cycling                 | 6              | 4                           | 630                       | Post                 | HAM-D, MADRS      |
| Not reported        | Y      | 11 | 0.0      | 25.4 (NA)           | N             | Mild                | Cycling                 | 6              | 7                           | 1224                      | Post                 | HAM-D, MADRS      |
| Not reported        | Y      | 9  | 0.0      | 25.4 (NA)           | N             | Mild                | Mixed aerobic exercises | 6              | 7                           | 1260                      | Post                 | HAM-D, MADRS      |
| Beffert 1994        |        |    |          |                     |               |                     |                         |                |                             |                           |                      |                   |
| USA                 | Y      | 11 | NA       | (12-16)             | N             | Unclear             | Waitlist control        | NA             | NA                          | NA                        | Post                 | RADS              |
| USA                 | Y      | 15 | NA       | (12-16)             | N             | Unclear             | Walking / Jogging       | 6              | 4                           | 258                       | Post, 8 weeks        | RADS              |
| BelvederiMurri 2015 |        |    |          |                     |               |                     |                         |                |                             |                           |                      |                   |
| Italy               | Y      | 42 | 69.0     | 75 (6.2)            | Y             | Moderate            | Exercise + SSRI         | 24             | 7                           | 1224                      | Post                 | HRSD              |
| Italy               | Y      | 37 | 68.0     | 75 (6.3)            | Y             | Moderate            | Exercise + SSRI         | 24             | 4                           | 774                       | Post                 | HRSD              |
| Italy               | Y      | 42 | 76.0     | 75.6 (5.6)          | Y             | Moderate            | SSRI                    | NA             | NA                          | NA                        | Post                 | HRSD              |
| Bhandari 2022       |        |    |          |                     |               |                     |                         |                |                             |                           |                      |                   |
| India               | Y      | 21 | 26.0     | 31.85 (11.44)       | Y             | Moderate            | Waitlist control        | NA             | NA                          | NA                        | Post                 | BDI               |

| Country         | Funded | n  | % Female | Mean Age (SD/Range) | Comorbidities | Baseline Depression | Treatment                     | Length (weeks) | Intensity prescribed (METs) | Exercise dose (METs/week) | Timepoints available | Outcomes measured |
|-----------------|--------|----|----------|---------------------|---------------|---------------------|-------------------------------|----------------|-----------------------------|---------------------------|----------------------|-------------------|
| India           | Y      | 19 | 53.0     | 31.64 (10.12)       | Y             | Moderate            | Yoga                          | 4              | 2                           | 808                       | Post                 | BDI               |
| India           | Y      | 21 | 52.0     | 32.71 (11.52)       | Y             | Moderate            | Yoga + Herbal Formula         | 4              | 2                           | 808                       | Post                 | BDI               |
| Bieber 2021     |        |    |          |                     |               |                     |                               |                |                             |                           |                      |                   |
| Germany         | Y      | 36 | 78.0     | 51.31 (9.19)        | N             | Moderate            | Waitlist control              | NA             | NA                          | NA                        | Post                 | BDI-II, MADRS     |
| Germany         | Y      | 47 | 81.0     | 48.38 (10.21)       | N             | Moderate            | Yoga                          | 12             | 4                           | 1080                      | Post                 | BDI-II, MADRS     |
| Blumenthal 1999 |        |    |          |                     |               |                     |                               |                |                             |                           |                      |                   |
| USA             | Y      | 53 | 74.0     | 57 (5.8)            | N             | Moderate            | Walking / Jogging             | 16             | 4                           | 387                       | Post                 | BDI, HAM-D        |
| USA             | Y      | 55 | 65.0     | 57 (6.7)            | N             | Moderate            | Exercise + SSRI               | 16             | NA                          | NA                        | Post                 | BDI, HAM-D        |
| USA             | Y      | 48 | 79.0     | 57 (7)              | N             | Moderate            | SSRI                          | 16             | NA                          | NA                        | Post                 | BDI, HAM-D        |
| Blumenthal 2007 |        |    |          |                     |               |                     |                               |                |                             |                           |                      |                   |
| USA             | Y      | 49 | 78.0     | 52 (8)              | Y             | Mild                | Placebo pill                  | 16             | NA                          | NA                        | 52 weeks             | HAM-D             |
| USA             | Y      | 53 | 73.5     | 52 (8)              | Y             | Mild                | Walking / Jogging             | 16             | 4                           | 506                       | 52 weeks             | HAM-D             |
| USA             | Y      | 49 | 78.0     | 52 (8)              | Y             | Mild                | SSRI                          | 16             | NA                          | NA                        | 52 weeks             | HAM-D             |
| Blumenthal 2012 |        |    |          |                     |               |                     |                               |                |                             |                           |                      |                   |
| USA             | Y      | 24 | 68.0     | 63.9 (NA)           | N             | Mild                | Placebo pill                  | 16             | NA                          | NA                        | Post                 | HAM-D             |
| USA             | Y      | 37 | 68.0     | 63.9 (NA)           | N             | Mild                | Walking / Jogging             | 16             | 4                           | 387                       | Post                 | HAM-D             |
| USA             | Y      | 40 | 68.0     | 63.9 (NA)           | N             | Mild                | SSRI                          | 16             | NA                          | NA                        | Post                 | HAM-D             |
| Bombardier 2013 |        |    |          |                     |               |                     |                               |                |                             |                           |                      |                   |
| USA             | Y      | 48 | 82.0     | NA                  | Y             | Mild                | Waitlist control              | NA             | NA                          | NA                        | Post                 | HAM-D             |
| USA             | Y      | 44 | 90.0     | NA                  | Y             | Moderate            | Physical activity counselling | 12             | NA                          | NA                        | Post                 | HAM-D             |
| Bonnet 2006     |        |    |          |                     |               |                     |                               |                |                             |                           |                      |                   |

| Country          | Funded | n  | % Female | Mean Age (SD/Range) | Comorbidities | Baseline Depression | Treatment                         | Length (weeks) | Intensity prescribed (METs) | Exercise dose (METs/week) | Timepoints available | Outcomes measured |
|------------------|--------|----|----------|---------------------|---------------|---------------------|-----------------------------------|----------------|-----------------------------|---------------------------|----------------------|-------------------|
| USA              | N      | 5  | 100.0    | 23.27 (NA)          | N             | Severe              | Aerobic + Therapy                 | 6              | NA                          | NA                        | Post, 4 weeks        | BDI, CES-D        |
| USA              | N      | 6  | 67.0     | 23.27 (NA)          | N             | Severe              | Cognitive behavioural therapy     | 9              | NA                          | NA                        | Post, 4 weeks        | BDI, CES-D        |
| Bosscher 1993    |        |    |          |                     |               |                     |                                   |                |                             |                           |                      |                   |
| The Netherlands  | N      | 9  | 56.0     | 34.7 (12.5)         | N             | Mild                | Aerobic + Strength                | 8              | 4                           | 445                       | Post                 | SDS               |
| The Netherlands  | N      | 9  | 44.0     | 35.8 (11.1)         | N             | Mild                | Walking / Jogging                 | 8              | 7                           | 945                       | Post                 | SDS               |
| Brenes 2007      |        |    |          |                     |               |                     |                                   |                |                             |                           |                      |                   |
| USA              | Y      | 12 | 50.0     | 73.9 (5.8)          | Y             | Mild                | Usual care                        | NA             | NA                          | NA                        | Post                 | HAM-D             |
| USA              | Y      | 14 | 64.0     | 73.5 (7.8)          | Y             | Mild                | Aerobic + Strength                | 16             | 4                           | 702                       | Post                 | HAM-D             |
| USA              | Y      | 11 | 73.0     | 76.4 (6.4)          | Y             | Mild                | SSRI                              | NA             | NA                          | NA                        | Post                 | HAM-D             |
| Bressington 2019 |        |    |          |                     |               |                     |                                   |                |                             |                           |                      |                   |
| China            | Y      | 27 | 70.0     | NA                  | Y             | Severe              | Usual care                        | NA             | NA                          | NA                        | Post, 12 weeks       | DASS              |
| China            | Y      | 23 | 70.0     | NA                  | Y             | Severe              | Laughter yoga                     | 4              | 2                           | NA                        | Post, 12 weeks       | DASS              |
| Briggs 2017      |        |    |          |                     |               |                     |                                   |                |                             |                           |                      |                   |
| USA              | Y      | 12 | 75.0     | 20.17 (1.9)         | N             | Severe              | Mind-body + Therapy               | 6              | NA                          | 150                       | 1 week, 4 weeks      | BDI-II            |
| USA              | Y      | 12 | 75.0     | 20.17 (1.9)         | N             | Severe              | Acceptance and commitment therapy | 6              | NA                          | NA                        | 1 week, 4 weeks      | BDI-II            |
| Brown 1992       |        |    |          |                     |               |                     |                                   |                |                             |                           |                      |                   |
| USA              | N      | 3  | NA       | 15.6 (NA)           | N             | Mild                | Usual care                        | 9              | NA                          | NA                        | Post                 | BDI               |
| USA              | N      | 4  | NA       | 15.6 (NA)           | N             | Moderate            | Walking / Jogging                 | 9              | NA                          | NA                        | Post                 | BDI               |
| Brush 2022       |        |    |          |                     |               |                     |                                   |                |                             |                           |                      |                   |
| USA              | N      | 35 | 69.0     | 20.26 (2.84)        | Y             | Moderate            | Mixed aerobic exercises           | 8              | 7                           | 945                       | Post                 | BDI-II            |
| USA              | N      | 31 | 81.0     | 20.19 (1.78)        | Y             | Moderate            | Stretching                        | 8              | 2                           | 310                       | Post                 | BDI-II            |

| Country                      | Funded | n   | % Female | Mean Age (SD/Range) | Comorbidities | Baseline Depression | Treatment               | Length (weeks) | Intensity prescribed (METs) | Exercise dose (METs/week) | Timepoints available     | Outcomes measured |
|------------------------------|--------|-----|----------|---------------------|---------------|---------------------|-------------------------|----------------|-----------------------------|---------------------------|--------------------------|-------------------|
| <b>Buschert 2018</b>         |        |     |          |                     |               |                     |                         |                |                             |                           |                          |                   |
| Germany                      | N      | 15  | 32.0     | NA                  | N             | Mild                | Educational             | NA             | NA                          | NA                        | Post                     | BDI-II, HAM-D     |
| Germany                      | N      | 15  | 32.0     | NA                  | N             | Moderate            | Walking / Jogging       | 4              | 5                           | 483                       | Post                     | BDI-II, HAM-D     |
| <b>Butler 2008</b>           |        |     |          |                     |               |                     |                         |                |                             |                           |                          |                   |
| USA                          | Y      | 16  | 74.0     | 50.4 (14.8)         | N             | Mild                | Educational             | 12             | NA                          | NA                        | 24 weeks, 36 weeks       | HAM-D             |
| USA                          | Y      | 15  | 74.0     | 50.4 (14.8)         | N             | Mild                | Mind-body + Therapy     | 12             | NA                          | NA                        | 24 weeks, 36 weeks       | HAM-D             |
| <b>Buttner 2015</b>          |        |     |          |                     |               |                     |                         |                |                             |                           |                          |                   |
| USA                          | N      | 29  | NA       | NA                  | N             | Mild                | Waitlist control        | NA             | NA                          | NA                        | Post                     | HAM-D             |
| USA                          | N      | 28  | NA       | NA                  | N             | Moderate            | Yoga                    | 8              | 2                           | 450                       | Post                     | HAM-D             |
| <b>Callaghan 2011</b>        |        |     |          |                     |               |                     |                         |                |                             |                           |                          |                   |
| UK                           | Y      | 19  | NA       | NA                  | N             | Severe              | Walking / Jogging       | 4              | 4                           | NA                        | Post                     | BDI               |
| <b>Carneiro 2015</b>         |        |     |          |                     |               |                     |                         |                |                             |                           |                          |                   |
| Portugal                     | Y      | 9   | 53.0     | 50.2 (12.1)         | N             | Severe              | Exercise + SSRI         | 16             | NA                          | NA                        | Post                     | BDI-II, DASS      |
| Portugal                     | Y      | 10  | 48.0     | 50.2 (12.1)         | N             | Severe              | SSRI                    | 16             | NA                          | NA                        | Post                     | BDI-II, DASS      |
| <b>Carter 2015</b>           |        |     |          |                     |               |                     |                         |                |                             |                           |                          |                   |
| UK                           | Y      | 42  | NA       | NA                  | N             | Severe              | Usual care              | 6              | NA                          | NA                        | Post, 18 weeks           | CDI               |
| UK                           | Y      | 44  | NA       | NA                  | N             | Severe              | Aerobic + Strength      | 6              | 5                           | 534                       | Post, 18 weeks           | CDI               |
| <b>Cecchini-Estrada 2015</b> |        |     |          |                     |               |                     |                         |                |                             |                           |                          |                   |
| Spain                        | Y      | 27  | NA       | NA                  | N             | Moderate            | Mixed aerobic exercises | 8              | NA                          | NA                        | Post, 24 weeks           | DSS               |
| Spain                        | Y      | 26  | NA       | NA                  | N             | Moderate            | Stretching              | NA             | 2                           | NA                        | Post, 24 weeks           | DSS               |
| <b>Chalder 2012</b>          |        |     |          |                     |               |                     |                         |                |                             |                           |                          |                   |
| UK                           | Y      | 179 | 65.0     | 38.8 (12.7)         | N             | Severe              | Usual care              | 17             | NA                          | NA                        | Post, 17 weeks, 35 weeks | BDI               |

| Country     | Funded | n   | % Female | Mean Age (SD/Range) | Comorbidities | Baseline Depression | Treatment                            | Length (weeks) | Intensity prescribed (METs) | Exercise dose (METs/week) | Timepoints available     | Outcomes measured   |
|-------------|--------|-----|----------|---------------------|---------------|---------------------|--------------------------------------|----------------|-----------------------------|---------------------------|--------------------------|---------------------|
| UK          | Y      | 182 | 68.0     | 40.9 (12.5)         | N             | Severe              | Physical activity counselling        | 17             | 4                           | 600                       | Post, 17 weeks, 35 weeks | BDI                 |
| Chan 2012   |        |     |          |                     |               |                     |                                      |                |                             |                           |                          |                     |
| China       | Y      | 17  | NA       | NA                  | N             | Moderate            | Cognitive behavioural therapy + SSRI | 10             | NA                          | NA                        | Post                     | BDI-II, HRSD        |
| China       | Y      | 17  | NA       | NA                  | N             | Severe              | Exercise + SSRI                      | 10             | 2                           | 225                       | Post                     | BDI-II, HRSD        |
| China       | Y      | 16  | NA       | NA                  | N             | Severe              | SSRI                                 | 10             | NA                          | NA                        | Post                     | BDI-II, HRSD        |
| Chang 2018  |        |     |          |                     |               |                     |                                      |                |                             |                           |                          |                     |
| South Korea | Y      | 46  | 88.0     | 77.8 (6.6)          | N             | Mild                | Social                               | 12             | NA                          | NA                        | Post                     | GDS                 |
| South Korea | Y      | 47  | 86.0     | 77.8 (6.6)          | N             | Mild                | Aerobic + Therapy                    | 12             | 4                           | 387                       | Post                     | GDS                 |
| Cheng 2012  |        |     |          |                     |               |                     |                                      |                |                             |                           |                          |                     |
| China       | Y      | 12  | NA       | NA                  | Y             | Moderate            | Social                               | 12             | NA                          | NA                        | Post, 24 weeks           | GDS-15              |
| China       | Y      | 12  | NA       | NA                  | Y             | Moderate            | Tai-chi / Qigong                     | 12             | 2                           | 450                       | Post, 24 weeks           | GDS-15              |
| Cheng 2016  |        |     |          |                     |               |                     |                                      |                |                             |                           |                          |                     |
| China       | Y      | 15  | 53.0     | 21.1 (1.4)          | N             | Mild                | Waitlist control                     | NA             | NA                          | NA                        | Post                     | BDI, HAMD           |
| China       | Y      | 15  | 53.0     | 21.1 (1.4)          | N             | Mild                | Tai-chi / Qigong                     | 12             | 2                           | 1050                      | Post                     | BDI, HAMD           |
| Cheung 2018 |        |     |          |                     |               |                     |                                      |                |                             |                           |                          |                     |
| China       | N      | 17  | 71.0     | 48.1 (10.8)         | N             | Moderate            | Usual care                           | NA             | NA                          | NA                        | Post                     | HADS, HAM-D, PHQ-15 |
| China       | N      | 17  | 88.0     | 47.4 (11.2)         | N             | Moderate            | Mixed aerobic exercises              | 12             | 7                           | 840                       | Post                     | HADS, HAM-D, PHQ-15 |
| Chin 2022   |        |     |          |                     |               |                     |                                      |                |                             |                           |                          |                     |
| Hong Kong   | Y      | 9   | 89.0     | 63.8 (6)            | N             | Moderate            | Stretching                           | 12             | 2                           | 172                       | Post                     | HADS, PHQ-9         |
| Hong Kong   | Y      | 10  | 78.0     | 65.9 (7)            | N             | Moderate            | Walking / Jogging                    | 12             | 3                           | 488                       | Post                     | HADS, PHQ-9         |
| Hong Kong   | Y      | 10  | 78.0     | 61.7 (2.7)          | N             | Moderate            | Walking / Jogging                    | 12             | 6                           | 488                       | Post                     | HADS, PHQ-9         |
| Hong Kong   | Y      | 10  | 78.0     | 63.7 (4.7)          | N             | Moderate            | Walking / Jogging                    | 12             | 3                           | 488                       | Post                     | HADS, PHQ-9         |

| Country         | Funded | n   | % Female | Mean Age (SD/Range) | Comorbidities | Baseline Depression | Treatment                     | Length (weeks) | Intensity prescribed (METs) | Exercise dose (METs/week) | Timepoints available | Outcomes measured |
|-----------------|--------|-----|----------|---------------------|---------------|---------------------|-------------------------------|----------------|-----------------------------|---------------------------|----------------------|-------------------|
| Hong Kong       | Y      | 10  | 78.0     | 61.5 (6.1)          | N             | Moderate            | Walking / Jogging             | 12             | 6                           | 488                       | Post                 | HADS, PHQ-9       |
| Chou 2004       |        |     |          |                     |               |                     |                               |                |                             |                           |                      |                   |
| China           | Y      | 7   | 50.0     | 72.6 (4.2)          | N             | Severe              | Waitlist control              | 12             | NA                          | NA                        | Post                 | CES-D             |
| China           | Y      | 7   | 50.0     | 72.6 (4.2)          | N             | Severe              | Tai-chi / Qigong              | 12             | 2                           | 338                       | Post                 | CES-D             |
| Chu 2009        |        |     |          |                     |               |                     |                               |                |                             |                           |                      |                   |
| USA             | N      | 18  | 100.0    | 26.4 (7.3)          | N             | Moderate            | Mixed aerobic exercises       | 10             | 7                           | 1225                      | Post                 | BDI-II            |
| USA             | N      | 18  | 100.0    | 26.6 (6.3)          | N             | Moderate            | Mixed aerobic exercises       | 10             | 4                           | 752                       | Post                 | BDI-II            |
| USA             | N      | 18  | 100.0    | 24.6 (4.8)          | N             | Moderate            | Stretching                    | 10             | 2                           | NA                        | Post                 | BDI-II            |
| Chu 2017        |        |     |          |                     |               |                     |                               |                |                             |                           |                      |                   |
| Taiwan          | Y      | 13  | 100.0    | NA                  | Y             | Moderate            | Waitlist control              | 12             | NA                          | NA                        | Post                 | BDI-II            |
| Taiwan          | Y      | 13  | 100.0    | NA                  | Y             | Severe              | Yoga                          | 12             | 2                           | 292                       | Post                 | BDI-II            |
| Chu 2018        |        |     |          |                     |               |                     |                               |                |                             |                           |                      |                   |
| USA             | Y      | 18  | 100.0    | 26.4 (NA)           | N             | Moderate            | Mixed aerobic exercises       | 10             | 4                           | 900                       | Post                 | BDI-II            |
| USA             | Y      | 18  | 100.0    | 26.4 (NA)           | N             | Moderate            | Mixed aerobic exercises       | 10             | 7                           | 980                       | Post                 | BDI-II            |
| USA             | Y      | 18  | 100.0    | 26.4 (NA)           | N             | Moderate            | Stretching                    | 10             | 2                           | NA                        | Post                 | BDI-II            |
| Ciccolo 2022    |        |     |          |                     |               |                     |                               |                |                             |                           |                      |                   |
| USA             | Y      | 21  | 0.0      | 41 (11.29)          | Y             | Moderate            | Educational                   | NA             | NA                          | NA                        | Post, 12 weeks       | PHQ-9             |
| USA             | Y      | 24  | 0.0      | 41.68 (13.44)       | Y             | Moderate            | Strength                      | 12             | 4                           | 420                       | Post, 12 weeks       | PHQ-9             |
| Cody 2023       |        |     |          |                     |               |                     |                               |                |                             |                           |                      |                   |
| Switzerland     | Y      | 107 | 49.0     | 39.95 (12.2)        | Y             | Moderate            | Educational                   | NA             | NA                          | NA                        | Post                 | BDI, HAM-D        |
| Switzerland     | Y      | 113 | 56.0     | 41.78 (12.94)       | Y             | Moderate            | Physical activity counselling | 52             | NA                          | NA                        | Post                 | BDI, HAM-D        |
| Cohen-Kahn 1995 |        |     |          |                     |               |                     |                               |                |                             |                           |                      |                   |
| USA             | N      | 16  | NA       | 15 (NA)             | N             | Severe              | Strength                      | 8              | 3                           | 504                       | Post                 | BDI, CDI          |



| Country       | Funded | n   | % Female | Mean Age (SD/Range) | Comorbidities | Baseline Depression | Treatment                     | Length (weeks) | Intensity prescribed (METs) | Exercise dose (METs/week) | Timepoints available | Outcomes measured    |
|---------------|--------|-----|----------|---------------------|---------------|---------------------|-------------------------------|----------------|-----------------------------|---------------------------|----------------------|----------------------|
| USA           | N      | 17  | NA       | 15 (NA)             | N             | Severe              | Strength                      | 8              | 4                           | 720                       | Post                 | BDI, CDI             |
| Cooney 2018   |        |     |          |                     |               |                     |                               |                |                             |                           |                      |                      |
| USA           | Y      | 19  | 100.0    | NA                  | Y             | Mild                | Aerobic + Behavioral + Diet   | 16             | NA                          | NA                        | Post                 | CES-D                |
| USA           | Y      | 12  | 100.0    | NA                  | Y             | Severe              | Aerobic + Diet                | 16             | NA                          | NA                        | Post                 | CES-D                |
| Craft 2007    |        |     |          |                     |               |                     |                               |                |                             |                           |                      |                      |
| USA           | Y      | 16  | 100.0    | 40.4 (10.6)         | N             | Moderate            | Walking / Jogging             | 12             | 4                           | 452                       | Post                 | BDI-II               |
| USA           | Y      | 16  | 100.0    | 40.4 (10.6)         | N             | Moderate            | Walking / Jogging             | 12             | 4                           | 301                       | Post                 | BDI-II               |
| D'Amato 1990  |        |     |          |                     |               |                     |                               |                |                             |                           |                      |                      |
| USA           | N      | 20  | 82.0     | 70.3 (9.2)          | N             | Mild                | Social                        | 3              | NA                          | NA                        | Post                 | GDS, SCL-90-R        |
| USA           | N      | 13  | 82.0     | 70.3 (9.2)          | N             | Mild                | Walking / Jogging             | 3              | 2                           | 990                       | Post                 | GDS, SCL-90-R        |
| Da Costa 2009 |        |     |          |                     |               |                     |                               |                |                             |                           |                      |                      |
| Canada        | Y      | 42  | 100.0    | NA                  | N             | Moderate            | Usual care                    | NA             | NA                          | NA                        | Post, 12 weeks       | EPDS, HAM-D          |
| Canada        | Y      | 46  | 100.0    | NA                  | N             | Moderate            | Aerobic + Strength            | 12             | 5                           | 540                       | Post, 12 weeks       | EPDS, HAM-D          |
| Daley 2008    |        |     |          |                     |               |                     |                               |                |                             |                           |                      |                      |
| UK            | Y      | 18  | 100.0    | (21-40)             | N             | Severe              | Usual care                    | 12             | NA                          | NA                        | Post                 | EPDS                 |
| UK            | Y      | 20  | 100.0    | (21-40)             | N             | Moderate            | Walking / Jogging             | 12             | 4                           | 645                       | Post                 | EPDS                 |
| Daley 2015    |        |     |          |                     |               |                     |                               |                |                             |                           |                      |                      |
| UK            | Y      | 47  | 100.0    | NA                  | N             | Moderate            | Usual care                    | 24             | NA                          | NA                        | 24 weeks, 48 weeks   | EPDS                 |
| UK            | Y      | 47  | 100.0    | NA                  | N             | Moderate            | Walking / Jogging             | 24             | 5                           | 648                       | 24 weeks, 48 weeks   | EPDS                 |
| DanHauer 2022 |        |     |          |                     |               |                     |                               |                |                             |                           |                      |                      |
| USA           | Y      | 125 | 82.0     | 66.3 (4.9)          | Y             | Unclear             | Yoga                          | 11             | 2                           | 375                       | 26 weeks             | PROMIS-29 Depression |
| USA           | Y      | 125 | 90.0     | 66.7 (5.7)          | Y             | Unclear             | Cognitive behavioural therapy | 11             | NA                          | NA                        | 26 weeks             | PROMIS-29 Depression |

| Country          | Funded | n  | % Female | Mean Age (SD/Range) | Comorbidities | Baseline Depression | Treatment                     | Length (weeks) | Intensity prescribed (METs) | Exercise dose (METs/week) | Timepoints available | Outcomes measured |
|------------------|--------|----|----------|---------------------|---------------|---------------------|-------------------------------|----------------|-----------------------------|---------------------------|----------------------|-------------------|
| Danielsson 2014  |        |    |          |                     |               |                     |                               |                |                             |                           |                      |                   |
| Sweden           | Y      | 20 | 80.0     | NA                  | Y             | Mild                | Educational                   | 10             | NA                          | NA                        | Post                 | MADRS             |
| Sweden           | Y      | 22 | 73.0     | NA                  | Y             | Mild                | Mixed aerobic exercises       | 10             | 5                           | 648                       | Post                 | MADRS             |
| Sweden           | Y      | 20 | 80.0     | NA                  | Y             | Mild                | Mind-body + Therapy           | 10             | NA                          | NA                        | Post                 | MADRS             |
| Davis 2014       |        |    |          |                     |               |                     |                               |                |                             |                           |                      |                   |
| USA              | Y      | 23 | 100.0    | 30.15 (4.92)        | Y             | Mild                | Usual care                    | 8              | NA                          | NA                        | Post                 | EPDS              |
| USA              | Y      | 23 | 100.0    | 30.15 (4.92)        | Y             | Mild                | Yoga                          | 8              | 2                           | 188                       | Post                 | EPDS              |
| de Groot 2019    |        |    |          |                     |               |                     |                               |                |                             |                           |                      |                   |
| USA              | Y      | 36 | NA       | NA                  | Y             | Moderate            | Usual care                    | NA             | NA                          | NA                        | Post                 | BDI-II            |
| USA              | Y      | 34 | NA       | NA                  | Y             | Moderate            | Mixed aerobic exercises       | 12             | 4                           | 645                       | Post                 | BDI-II            |
| USA              | Y      | 34 | NA       | NA                  | Y             | Severe              | Aerobic + Therapy             | 12             | 4                           | 645                       | Post                 | BDI-II            |
| USA              | Y      | 36 | NA       | NA                  | Y             | Moderate            | Cognitive behavioural therapy | NA             | NA                          | NA                        | Post                 | BDI-II            |
| de Manincor 2016 |        |    |          |                     |               |                     |                               |                |                             |                           |                      |                   |
| Australia        | N      | 54 | 80.0     | NA                  | Y             | Moderate            | Usual care                    | 6              | NA                          | NA                        | Post                 | DASS              |
| Australia        | N      | 47 | 80.0     | NA                  | Y             | Moderate            | Yoga                          | 6              | 2                           | 375                       | Post                 | DASS              |
| Deus 2021        |        |    |          |                     |               |                     |                               |                |                             |                           |                      |                   |
| Brazil           | Y      | 76 | 47.0     | 66.33 (3.88)        | Y             | Moderate            | Waitlist control              | NA             | NA                          | NA                        | Post                 | BDI               |
| Brazil           | Y      | 81 | 43.0     | 67.27 (3.24)        | Y             | Moderate            | Strength                      | 26             | 4                           | 630                       | Post                 | BDI               |
| Dopp 2018        |        |    |          |                     |               |                     |                               |                |                             |                           |                      |                   |
| USA              | Y      | 9  | NA       | NA                  | N             | Severe              | Usual care                    | 12             | NA                          | NA                        | Post                 | CDI               |
| USA              | Y      | 9  | NA       | NA                  | N             | Severe              | Mixed aerobic exercises       | 12             | NA                          | NA                        | Post                 | CDI               |

| Country        | Funded | n  | % Female | Mean Age (SD/Range) | Comorbidities | Baseline Depression | Treatment                     | Length (weeks) | Intensity prescribed (METs) | Exercise dose (METs/week) | Timepoints available   | Outcomes measured |
|----------------|--------|----|----------|---------------------|---------------|---------------------|-------------------------------|----------------|-----------------------------|---------------------------|------------------------|-------------------|
| Doyne 1987     |        |    |          |                     |               |                     |                               |                |                             |                           |                        |                   |
| USA            | N      | 30 | 100.0    | 29.46 (4.68)        | N             | Moderate            | Waitlist control              | 8              | NA                          | NA                        | Post                   | BDI               |
| USA            | N      | 30 | 100.0    | 27.67 (4.81)        | N             | Moderate            | Strength                      | 8              | 4                           | 315                       | Post                   | BDI               |
| USA            | N      | 30 | 100.0    | 28.48 (3.48)        | N             | Moderate            | Walking / Jogging             | 8              | 4                           | 387                       | Post                   | BDI               |
| Dunn 2002      |        |    |          |                     |               |                     |                               |                |                             |                           |                        |                   |
| USA            | Y      | 16 | 81.0     | 37.9 (6.3)          | N             | Moderate            | Mixed aerobic exercises       | 12             | 6                           | 975                       | Post                   | HAM-D             |
| USA            | Y      | 18 | 72.0     | 37.7 (5.1)          | N             | Moderate            | Mixed aerobic exercises       | 12             | 4                           | 525                       | Post                   | HAM-D             |
| USA            | Y      | 16 | 81.0     | 35.8 (6.1)          | N             | Moderate            | Mixed aerobic exercises       | 12             | 4                           | 315                       | Post                   | HAM-D             |
| USA            | Y      | 17 | 76.0     | 33.2 (6.7)          | N             | Moderate            | Mixed aerobic exercises       | 12             | 6                           | 585                       | Post                   | HAM-D             |
| USA            | Y      | 13 | 62.0     | 34.5 (7.3)          | N             | Moderate            | Stretching                    | 12             | 2                           | NA                        | Post                   | HAM-D             |
| Epstein 1986   |        |    |          |                     |               |                     |                               |                |                             |                           |                        |                   |
| USA            | Y      | 26 | NA       | 39.42 (NA)          | N             | Moderate            | Waitlist control              | 8              | NA                          | NA                        | Post                   | BDI, SDS          |
| USA            | Y      | 26 | NA       | 39.42 (NA)          | N             | Moderate            | Walking / Jogging             | 8              | 4                           | 516                       | Post, 4 weeks, 9 weeks | BDI, SDS          |
| USA            | Y      | 26 | NA       | 39.42 (NA)          | N             | Severe              | Cognitive behavioural therapy | 8              | NA                          | NA                        | Post, 4 weeks, 9 weeks | BDI, SDS          |
| Euteneuer 2017 |        |    |          |                     |               |                     |                               |                |                             |                           |                        |                   |
| Germany        | Y      | 30 | 49.0     | 37.3 (12.2)         | Y             | Moderate            | Waitlist control              | NA             | NA                          | NA                        | Post                   | BDI-II            |
| Germany        | Y      | 34 | 49.0     | 37.3 (12.2)         | Y             | Moderate            | Aerobic + Therapy             | 16             | 4                           | 720                       | Post                   | BDI-II            |
| Germany        | Y      | 34 | 49.0     | 37.3 (12.2)         | Y             | Moderate            | Cognitive behavioural therapy | 16             | NA                          | NA                        | Post                   | BDI-II            |
| Fetsch 1980    |        |    |          |                     |               |                     |                               |                |                             |                           |                        |                   |
| USA            | N      | 8  | 57.0     | (18-51)             | N             | Moderate            | Social                        | 4              | NA                          | NA                        | Post                   | BDI               |
| USA            | N      | 8  | 57.0     | (20-35)             | N             | Moderate            | Walking / Jogging             | 4              | 4                           | 129                       | Post                   | BDI               |

| Country          | Funded | n  | % Female | Mean Age (SD/Range) | Comorbidities | Baseline Depression | Treatment                     | Length (weeks) | Intensity prescribed (METs) | Exercise dose (METs/week) | Timepoints available    | Outcomes measured |
|------------------|--------|----|----------|---------------------|---------------|---------------------|-------------------------------|----------------|-----------------------------|---------------------------|-------------------------|-------------------|
| Field 2012       |        |    |          |                     |               |                     |                               |                |                             |                           |                         |                   |
| USA              | Y      | 28 | 100.0    | 26.6 (NA)           | N             | Mild                | Usual care                    | 12             | NA                          | NA                        | Post                    | CES-D             |
| USA              | Y      | 28 | 100.0    | 26.6 (NA)           | N             | Severe              | Yoga                          | NA             | 2                           | 100                       | Post                    | CES-D             |
| USA              | Y      | 28 | 100.0    | 26.6 (NA)           | N             | Severe              | Relaxation                    | 12             | NA                          | NA                        | Post                    | CES-D             |
| Field 2013       |        |    |          |                     |               |                     |                               |                |                             |                           |                         |                   |
| USA              | Y      | 39 | 100.0    | 24.9 (5.2)          | N             | Severe              | Social                        | 12             | NA                          | NA                        | Post                    | CES-D, EPDS       |
| USA              | Y      | 40 | 100.0    | 24.9 (5.2)          | N             | Severe              | Yoga                          | 12             | 2                           | 50                        | Post                    | CES-D, EPDS       |
| Foley 2008       |        |    |          |                     |               |                     |                               |                |                             |                           |                         |                   |
| New Zealand      | N      | 10 | NA       | (18-55)             | N             | Moderate            | Mixed aerobic exercises       | 12             | 5                           | 567                       | Post                    | BDI, MADRS        |
| New Zealand      | N      | 13 | NA       | (18-55)             | N             | Moderate            | Stretching                    | 12             | 2                           | NA                        | Post                    | BDI, MADRS        |
| Forsyth 2017     |        |    |          |                     |               |                     |                               |                |                             |                           |                         |                   |
| UK               | N      | 11 | 100.0    | NA                  | N             | Moderate            | Usual care                    | NA             | NA                          | NA                        | Post, 12 weeks          | EPDS              |
| UK               | N      | 11 | 100.0    | NA                  | N             | Moderate            | Mixed aerobic exercises       | 12             | 4                           | 645                       | Post, 12 weeks          | EPDS              |
| Fremont 1987     |        |    |          |                     |               |                     |                               |                |                             |                           |                         |                   |
| USA              | N      | 15 | 71.0     | (19-62)             | N             | Mild                | Walking / Jogging             | 10             | 5                           | 324                       | Post, 8 weeks, 16 weeks | BDI               |
| USA              | N      | 18 | 76.0     | (19-62)             | N             | Mild                | Aerobic + Therapy             | 10             | NA                          | NA                        | Post, 8 weeks, 16 weeks | BDI               |
| USA              | N      | 16 | 73.0     | (19-62)             | N             | Moderate            | Cognitive behavioural therapy | 10             | NA                          | NA                        | Post, 8 weeks, 16 weeks | BDI               |
| Gao 2016         |        |    |          |                     |               |                     |                               |                |                             |                           |                         |                   |
| China            | N      | 24 | 100.0    | 52.5 (4.3)          | N             | Mild                | Waitlist control              | NA             | NA                          | NA                        | Post                    | SDS               |
| China            | N      | 26 | 100.0    | 52.5 (4.3)          | N             | Mild                | Dance                         | 13             | 4                           | 1312                      | Post                    | SDS               |
| García-Toro 2012 |        |    |          |                     |               |                     |                               |                |                             |                           |                         |                   |

| Country       | Funded | n   | % Female | Mean Age (SD/Range) | Comorbidities | Baseline Depression | Treatment                     | Length (weeks) | Intensity prescribed (METs) | Exercise dose (METs/week) | Timepoints available | Outcomes measured |
|---------------|--------|-----|----------|---------------------|---------------|---------------------|-------------------------------|----------------|-----------------------------|---------------------------|----------------------|-------------------|
| Spain         | Y      | 40  | 48.0     | NA                  | N             | Moderate            | Usual care                    | 26             | NA                          | NA                        | Post                 | BDI, HAM-D        |
| Spain         | Y      | 40  | 48.0     | NA                  | N             | Moderate            | Aerobic + Behavioral + Diet   | 26             | NA                          | NA                        | Post                 | BDI, HAM-D        |
| Gary 2010     |        |     |          |                     |               |                     |                               |                |                             |                           |                      |                   |
| USA           | Y      | 17  | 63.0     | 68 (13.5)           | N             | Mild                | Usual care                    | 12             | NA                          | NA                        | Post, 12 weeks       | HAM-D             |
| USA           | Y      | 20  | 54.0     | 68 (13.5)           | N             | Mild                | Walking / Jogging             | 12             | 4                           | 774                       | Post, 12 weeks       | HAM-D             |
| USA           | Y      | 18  | 60.0     | 68 (13.5)           | N             | Moderate            | Aerobic + Therapy             | 12             | NA                          | NA                        | Post, 12 weeks       | HAM-D             |
| USA           | Y      | 19  | 57.0     | 68 (13.5)           | N             | Mild                | Cognitive behavioural therapy | 12             | NA                          | NA                        | Post, 12 weeks       | HAM-D             |
| Gautam 2019   |        |     |          |                     |               |                     |                               |                |                             |                           |                      |                   |
| India         | Y      | 36  | 78.0     | NA                  | Y             | Mild                | Usual care                    | 8              | NA                          | NA                        | Post                 | BDI-II            |
| India         | Y      | 36  | 78.0     | NA                  | Y             | Moderate            | Yoga                          | 8              | 2                           | 1500                      | Post                 | BDI-II            |
| Goracci 2016  |        |     |          |                     |               |                     |                               |                |                             |                           |                      |                   |
| Italy         | Y      | 81  | 80.0     | 49 (NA)             | N             | Mild                | Educational                   | 13             | NA                          | NA                        | Post                 | PHQ-9             |
| Italy         | Y      | 79  | 80.0     | 49 (NA)             | N             | Mild                | SSRI + Educational            | 13             | NA                          | NA                        | Post                 | PHQ-9             |
| Greer 2015    |        |     |          |                     |               |                     |                               |                |                             |                           |                      |                   |
| USA           | Y      | 19  | 89.0     | 46.7 (9.6)          | N             | Severe              | Mixed aerobic exercises       | 12             | 8                           | 960                       | Post                 | QIDS-CR           |
| USA           | Y      | 20  | 85.0     | 46.7 (9.6)          | N             | Severe              | Mixed aerobic exercises       | 12             | 5                           | 648                       | Post                 | QIDS-CR           |
| Gujral 2019   |        |     |          |                     |               |                     |                               |                |                             |                           |                      |                   |
| USA           | Y      | 7   | 71.0     | NA                  | N             | Mild                | Exercise + SSRI               | 12             | 3                           | 1598                      | Post                 | MADRS             |
| USA           | Y      | 8   | 62.0     | NA                  | N             | Mild                | SSRI                          | 12             | NA                          | NA                        | Post                 | MADRS             |
| Guo 2020      |        |     |          |                     |               |                     |                               |                |                             |                           |                      |                   |
| China         | Y      | 150 | NA       | NA                  | Y             | Severe              | Waitlist control              | NA             | NA                          | NA                        | Post                 | CES-D             |
| China         | Y      | 150 | NA       | NA                  | Y             | Severe              | Walking / Jogging             | 13             | 4                           | 774                       | Post                 | CES-D             |
| Hallgren 2015 |        |     |          |                     |               |                     |                               |                |                             |                           |                      |                   |
| Sweden        | Y      | 312 | 74.0     | 43 (12)             | Y             | Mild                | Usual care                    | 12             | NA                          | NA                        | Post                 | MADRS             |

| Country         | Funded | n   | % Female | Mean Age (SD/Range) | Comorbidities | Baseline Depression | Treatment                            | Length (weeks) | Intensity prescribed (METs) | Exercise dose (METs/week) | Timepoints available | Outcomes measured |
|-----------------|--------|-----|----------|---------------------|---------------|---------------------|--------------------------------------|----------------|-----------------------------|---------------------------|----------------------|-------------------|
| Sweden          | Y      | 316 | 73.0     | 43 (12)             | Y             | Mild                | Aerobic + Strength                   | 12             | 4                           | 810                       | Post                 | MADRS             |
| Sweden          | Y      | 317 | 72.0     | 43 (12)             | Y             | Mild                | Cognitive behavioural therapy        | 12             | NA                          | NA                        | Post                 | MADRS             |
| Hanssen 2018    |        |     |          |                     |               |                     |                                      |                |                             |                           |                      |                   |
| Switzerland     | N      | 15  | 83.0     | 37.8 (NA)           | N             | Severe              | Cycling                              | 4              | 5                           | 518                       | Post                 | BDI-II            |
| Switzerland     | N      | 19  | 66.0     | 37.8 (NA)           | N             | Severe              | Cycling                              | 4              | 8                           | 840                       | Post                 | BDI-II            |
| Hausleiter 2020 |        |     |          |                     |               |                     |                                      |                |                             |                           |                      |                   |
| Germany         | N      | 40  | 33.0     | 46.43 (11.6)        | Y             | Moderate            | Self guided physical activity        | 6              | NA                          | NA                        | Post                 | HAM-D             |
| Germany         | N      | 36  | 32.0     | 43.94 (13.24)       | Y             | Moderate            | Mixed aerobic exercises + relaxation | 6              | 5                           | 750                       | Post                 | HAM-D             |
| Heh 2008        |        |     |          |                     |               |                     |                                      |                |                             |                           |                      |                   |
| Taiwan          | Y      | 33  | 100.0    | NA                  | N             | Moderate            | Waitlist control                     | 12             | NA                          | NA                        | Post                 | EPDS              |
| Taiwan          | Y      | 33  | 100.0    | NA                  | N             | Moderate            | Stretching                           | 12             | 2                           | NA                        | Post                 | EPDS              |
| Heinzel 2022    |        |     |          |                     |               |                     |                                      |                |                             |                           |                      |                   |
| Germany         | Y      | 30  | 63.0     | 42.67 (10.68)       | N             | Moderate            | Waitlist control                     | NA             | NA                          | NA                        | Post                 | BDI-II, HAM-D     |
| Germany         | Y      | 41  | 54.0     | 38.07 (10.74)       | N             | Moderate            | Mixed aerobic exercises              | 12             | 8                           | 984                       | Post                 | BDI-II, HAM-D     |
| Germany         | Y      | 42  | 31.0     | 38.52 (9.34)        | N             | Moderate            | Mixed aerobic exercises + relaxation | 12             | 3                           | 324                       | Post                 | BDI-II, HAM-D     |
| Heissel 2015    |        |     |          |                     |               |                     |                                      |                |                             |                           |                      |                   |
| Germany         | N      | 7   | 50.0     | 66.8 (NA)           | N             | Severe              | Aerobic + Strength                   | 4              | 5                           | 534                       | Post                 | BDI-II            |
| Germany         | N      | 7   | 50.0     | 66.8 (NA)           | N             | Mild                | Relaxation                           | 4              | 2                           | NA                        | Post                 | BDI-II            |
| Hemat-Far 2012  |        |     |          |                     |               |                     |                                      |                |                             |                           |                      |                   |
| Iran            | N      | 10  | 100.0    | (18-25)             | N             | Moderate            | Waitlist control                     | 8              | NA                          | NA                        | Post                 | BDI               |
| Iran            | N      | 10  | 100.0    | (18-25)             | N             | Moderate            | Walking / Jogging                    | 8              | 5                           | 795                       | Post                 | BDI               |

| Country           | Funded | n  | % Female | Mean Age (SD/Range) | Comorbidities | Baseline Depression | Treatment                     | Length (weeks) | Intensity prescribed (METs) | Exercise dose (METs/week) | Timepoints available     | Outcomes measured |
|-------------------|--------|----|----------|---------------------|---------------|---------------------|-------------------------------|----------------|-----------------------------|---------------------------|--------------------------|-------------------|
| Hess-Homeier 1981 |        |    |          |                     |               |                     |                               |                |                             |                           |                          |                   |
| Not reported      | Y      | 6  | NA       | 30 (NA)             | N             | Moderate            | Waitlist control              | NA             | NA                          | NA                        | Post                     | BDI               |
| Not reported      | Y      | 5  | NA       | 32 (NA)             | N             | Moderate            | Walking / Jogging             | 8              | 4                           | 516                       | Post                     | BDI               |
| Not reported      | Y      | 6  | NA       | 30 (NA)             | N             | Moderate            | Cognitive behavioural therapy | 8              | NA                          | NA                        | Post                     | BDI               |
| Ho 2014           |        |    |          |                     |               |                     |                               |                |                             |                           |                          |                   |
| China             | Y      | 26 | 34.0     | NA                  | N             | Moderate            | Aerobic + Strength            | 3              | 8                           | 1600                      | Post                     | BDI-II, MADRS     |
| China             | Y      | 26 | 34.0     | NA                  | N             | Severe              | Stretching                    | 3              | NA                          | NA                        | Post                     | BDI-II, MADRS     |
| Hoffman 2010      |        |    |          |                     |               |                     |                               |                |                             |                           |                          |                   |
| USA               | Y      | 40 | 50.0     | 37.1 (NA)           | N             | Moderate            | Waitlist control              | 10             | NA                          | NA                        | Post                     | BDI               |
| USA               | Y      | 40 | 38.0     | 39.7 (NA)           | N             | Moderate            | Mixed aerobic exercises       | 10             | 8                           | 1192                      | Post                     | BDI               |
| Huang 2015        |        |    |          |                     |               |                     |                               |                |                             |                           |                          |                   |
| Taiwan            | Y      | 20 | 53.0     | 76.53 (5.94)        | N             | Mild                | Usual care                    | 12             | NA                          | NA                        | Post, 12 weeks, 24 weeks | GDS-15            |
| Taiwan            | Y      | 19 | 53.0     | 76.53 (5.94)        | N             | Moderate            | Aerobic + Strength            | 12             | 2                           | 544                       | Post, 12 weeks, 24 weeks | GDS-15            |
| Taiwan            | Y      | 18 | 53.0     | 76.53 (5.94)        | N             | Mild                | Cognitive behavioural therapy | 12             | NA                          | NA                        | Post, 12 weeks, 24 weeks | GDS-15            |
| Hughes 2013       |        |    |          |                     |               |                     |                               |                |                             |                           |                          |                   |
| USA               | Y      | 14 | 42.0     | 17 (16.1-17.9)      | Y             | Severe              | Aerobic + Strength            | 12             | 5                           | 567                       | Post                     | CDI, QIDS-CR      |
| USA               | Y      | 12 | 42.0     | 17 (16.1-17.9)      | Y             | Severe              | Stretching                    | 12             | 2                           | NA                        | Post                     | CDI, QIDS-CR      |
| Imboden 2020      |        |    |          |                     |               |                     |                               |                |                             |                           |                          |                   |
| Switzerland       | Y      | 22 | 46.0     | 41.3 (9.2)          | N             | Moderate            | Mixed aerobic exercises       | 6              | 7                           | 918                       | Post, 20 weeks           | BDI, HDRS         |

| Country        | Funded | n   | % Female | Mean Age (SD/Range) | Comorbidities | Baseline Depression | Treatment                     | Length (weeks) | Intensity prescribed (METs) | Exercise dose (METs/week) | Timepoints available | Outcomes measured |
|----------------|--------|-----|----------|---------------------|---------------|---------------------|-------------------------------|----------------|-----------------------------|---------------------------|----------------------|-------------------|
| Switzerland    | Y      | 20  | 50.0     | 38.3 (13.4)         | N             | Moderate            | Stretching                    | 6              | 2                           | 310                       | Post, 20 weeks       | BDI, HDRS         |
| Irandoust 2019 |        |     |          |                     |               |                     |                               |                |                             |                           |                      |                   |
| Iran           | N      | 34  | 0.0      | 46.2 (2.1)          | N             | Moderate            | Walking / Jogging             | 12             | 4                           | 387                       | Post                 | BDI               |
| Jelalian 2019  |        |     |          |                     |               |                     |                               |                |                             |                           |                      |                   |
| USA            | Y      | 24  | 50.0     | NA                  | N             | Moderate            | Aerobic + Therapy             | 24             | NA                          | NA                        | Post, 24 weeks       | BDI               |
| USA            | Y      | 9   | NA       | NA                  | N             | Moderate            | Cognitive behavioural therapy | 24             | NA                          | NA                        | Post, 24 weeks       | BDI               |
| Jeong 2005     |        |     |          |                     |               |                     |                               |                |                             |                           |                      |                   |
| South Korea    | Y      | 20  | 100.0    | 16 (NA)             | N             | Unclear             | Waitlist control              | 12             | NA                          | NA                        | Post                 | SCL-20            |
| South Korea    | Y      | 20  | 100.0    | 16 (NA)             | N             | Unclear             | Dance                         | 12             | 5                           | 729                       | Post                 | SCL-20            |
| Jin 2019       |        |     |          |                     |               |                     |                               |                |                             |                           |                      |                   |
| South Korea    | Y      | 15  | 100.0    | NA                  | N             | Moderate            | Placebo pill                  | 26             | NA                          | NA                        | Post                 | GDS-15            |
| South Korea    | Y      | 15  | 100.0    | NA                  | N             | Moderate            | Aerobic + Strength            | 26             | 3                           | 478                       | Post                 | GDS-15            |
| Jing 2022      |        |     |          |                     |               |                     |                               |                |                             |                           |                      |                   |
| China          | N      | 30  | NA       | NA                  | N             | Severe              | Exercise + SSRI               | 8              | 7                           | 1260                      | Post                 | HAM-D             |
| China          | N      | 30  | NA       | NA                  | N             | Severe              | SSRI                          | NA             | NA                          | NA                        | Post                 | HAM-D             |
| Joyce 2021     |        |     |          |                     |               |                     |                               |                |                             |                           |                      |                   |
| USA            | Y      | 64  | 66.0     | 44.3 (10.3)         | Y             | Mild                | Educational                   | 12             | 1                           | NA                        | Post, 40 weeks       | PHQ-8             |
| USA            | Y      | 129 | 70.0     | 46 (11.4)           | Y             | Mild                | Aerobic + Strength            | 12             | 6                           | 210                       | Post, 40 weeks       | PHQ-8             |
| USA            | Y      | 127 | 57.0     | 46.7 (10.2)         | Y             | Mild                | Yoga                          | 12             | 2                           | 188                       | Post, 40 weeks       | PHQ-8             |
| Kanner 1991    |        |     |          |                     |               |                     |                               |                |                             |                           |                      |                   |
| USA            | N      | 23  | 41.0     | 13.63 (2.58)        | N             | Mild                | Social                        | 8              | NA                          | NA                        | Post                 | CDI               |
| USA            | N      | 22  | 42.0     | 13.63 (2.58)        | N             | Mild                | Cycling                       | 8              | 3                           | 540                       | Post                 | CDI               |



| Country       | Funded | n  | % Female | Mean Age (SD/Range) | Comorbidities | Baseline Depression | Treatment                     | Length (weeks) | Intensity prescribed (METs) | Exercise dose (METs/week) | Timepoints available | Outcomes measured |
|---------------|--------|----|----------|---------------------|---------------|---------------------|-------------------------------|----------------|-----------------------------|---------------------------|----------------------|-------------------|
| USA           | N      | 23 | 41.0     | 13.63 (2.58)        | N             | Mild                | Cycling                       | 8              | 5                           | 972                       | Post                 | CDI               |
| Kerling 2015  |        |    |          |                     |               |                     |                               |                |                             |                           |                      |                   |
| Germany       | N      | 20 | NA       | NA                  | N             | Severe              | Usual care                    | 6              | NA                          | NA                        | Post                 | BDI-II, MADRS     |
| Germany       | N      | 22 | NA       | NA                  | N             | Severe              | Cycling                       | 6              | 6                           | 810                       | Post                 | BDI-II, MADRS     |
| Khoshnab 2017 |        |    |          |                     |               |                     |                               |                |                             |                           |                      |                   |
| Iran          | Y      | 15 | 100.0    | NA                  | N             | Severe              | Waitlist control              | 8              | NA                          | NA                        | Post                 | BDI               |
| Iran          | Y      | 15 | 100.0    | NA                  | N             | Moderate            | Walking / Jogging             | 8              | 4                           | 645                       | Post                 | BDI               |
| Iran          | Y      | 15 | 100.0    | NA                  | N             | Severe              | Exercise + SSRI               | 8              | NA                          | NA                        | Post                 | BDI               |
| Iran          | Y      | 15 | 100.0    | NA                  | N             | Severe              | SSRI                          | 8              | NA                          | NA                        | Post                 | BDI               |
| Kim 2022      |        |    |          |                     |               |                     |                               |                |                             |                           |                      |                   |
| South Korea   | N      | 8  | 100.0    | 38.14 (1.39)        | N             | Severe              | Waitlist control              | NA             | NA                          | NA                        | Post                 | EPDS              |
| South Korea   | N      | 8  | 100.0    | 39.71 (2.01)        | N             | Severe              | Pilates                       | 8              | 3                           | 300                       | Post                 | EPDS              |
| Klein 1984    |        |    |          |                     |               |                     |                               |                |                             |                           |                      |                   |
| USA           | Y      | 27 | 70.0     | 30.33 (6.52)        | N             | Severe              | Walking / Jogging             | 12             | 4                           | 580                       | Post                 | SCL-20            |
| USA           | Y      | 24 | 71.0     | 29.75 (6.07)        | N             | Severe              | Cognitive behavioural therapy | 12             | NA                          | NA                        | Post                 | SCL-20            |
| USA           | Y      | 23 | 74.0     | 29.96 (6.29)        | N             | Severe              | Relaxation                    | 12             | 2                           | NA                        | Post                 | SCL-20            |
| Knubben 2007  |        |    |          |                     |               |                     |                               |                |                             |                           |                      |                   |
| Germany       | N      | 18 | NA       | 50 (13)             | N             | Severe              | Stretching                    | 1              | 2                           | NA                        | Post                 | CES-D             |
| Germany       | N      | 20 | NA       | 49 (13)             | N             | Severe              | Walking / Jogging             | 1              | 4                           | 903                       | Post                 | CES-D             |
| Kouidi 2010   |        |    |          |                     |               |                     |                               |                |                             |                           |                      |                   |
| Greece        | N      | 20 | 22.0     | NA                  | N             | Moderate            | Waitlist control              | 52             | NA                          | NA                        | Post                 | BDI, HADS         |

| Country         | Funded | n  | % Female | Mean Age (SD/Range) | Comorbidities | Baseline Depression | Treatment               | Length (weeks) | Intensity prescribed (METs) | Exercise dose (METs/week) | Timepoints available | Outcomes measured |
|-----------------|--------|----|----------|---------------------|---------------|---------------------|-------------------------|----------------|-----------------------------|---------------------------|----------------------|-------------------|
| Greece          | N      | 24 | 19.0     | NA                  | N             | Moderate            | Aerobic + Strength      | 52             | 5                           | 1016                      | Post                 | BDI, HADS         |
| Krogh 2009      |        |    |          |                     |               |                     |                         |                |                             |                           |                      |                   |
| Denmark         | Y      | 55 | 78.0     | 38.1 (9)            | N             | Severe              | Mixed aerobic exercises | 17             | 5                           | 972                       | Post, 32 weeks       | BDI, HAM-D, MADRS |
| Denmark         | Y      | 55 | 82.0     | 41.9 (8.7)          | N             | Severe              | Strength                | 17             | 4                           | 720                       | Post, 32 weeks       | BDI, HAM-D, MADRS |
| Denmark         | Y      | 55 | 62.0     | 36.7 (8.7)          | N             | Severe              | Relaxation              | 17             | NA                          | NA                        | Post, 32 weeks       | BDI, HAM-D, MADRS |
| Krogh 2012      |        |    |          |                     |               |                     |                         |                |                             |                           |                      |                   |
| Denmark         | N      | 56 | 67.0     | 41.6 (NA)           | Y             | Severe              | Cycling                 | NA             | 5                           | 729                       | Post                 | BDI-II, HAM-D     |
| Denmark         | N      | 59 | 67.0     | 41.6 (NA)           | Y             | Severe              | Stretching              | NA             | 2                           | NA                        | Post                 | BDI-II, HAM-D     |
| Kruisdijk 2019  |        |    |          |                     |               |                     |                         |                |                             |                           |                      |                   |
| The Netherlands | Y      | 7  | 61.0     | 41.2 (9.1)          | N             | Severe              | Usual care              | NA             | NA                          | NA                        | Post                 | HAM-D             |
| The Netherlands | Y      | 12 | 61.0     | 41.2 (9.1)          | N             | Moderate            | Walking / Jogging       | 13             | 4                           | 540                       | Post                 | HAM-D             |
| Kuvačić 2018    |        |    |          |                     |               |                     |                         |                |                             |                           |                      |                   |
| Croatia         | N      | 15 | 47.0     | 34.2 (4.52)         | N             | Mild                | Educational             | 8              | NA                          | NA                        | Post                 | SDS               |
| Croatia         | N      | 15 | 47.0     | 34.2 (4.52)         | N             | Mild                | Yoga                    | 8              | 2                           | 375                       | Post                 | SDS               |
| Lanza 2018      |        |    |          |                     |               |                     |                         |                |                             |                           |                      |                   |
| Italy           | Y      | 6  | 92.0     | NA                  | N             | Mild                | Mixed aerobic exercises | 43             | 2                           | 562                       | Post                 | GDS               |
| Italy           | Y      | 6  | 92.0     | NA                  | N             | Mild                | Aerobic + Massage       | 43             | NA                          | NA                        | Post                 | GDS               |
| LaRocque 2021   |        |    |          |                     |               |                     |                         |                |                             |                           |                      |                   |
| Canada          | Y      | 15 | 100.0    | 29.4 (13.08)        | Y             | Mild                | Waitlist control        | NA             | NA                          | NA                        | Post                 | HAM-D             |
| Canada          | Y      | 20 | 100.0    | 34.85 (15.15)       | Y             | Mild                | Mixed aerobic exercises | 8              | 8                           | 912                       | Post                 | HAM-D             |

| Country        | Funded | n  | % Female | Mean Age (SD/Range) | Comorbidities | Baseline Depression | Treatment                     | Length (weeks) | Intensity prescribed (METs) | Exercise dose (METs/week) | Timepoints available | Outcomes measured |
|----------------|--------|----|----------|---------------------|---------------|---------------------|-------------------------------|----------------|-----------------------------|---------------------------|----------------------|-------------------|
| Canada         | Y      | 18 | 100.0    | 34.17 (15.75)       | Y             | Mild                | Yoga                          | 8              | 4                           | 675                       | Post                 | HAM-D             |
| Lavretsky 2011 |        |    |          |                     |               |                     |                               |                |                             |                           |                      |                   |
| USA            | Y      | 37 | 61.0     | NA                  | N             | Mild                | Educational                   | 10             | NA                          | NA                        | Post                 | HAM-D             |
| USA            | Y      | 36 | 62.0     | NA                  | N             | Moderate            | Tai-chi / Qigong              | 10             | 2                           | 300                       | Post                 | HAM-D             |
| Lavretsky 2022 |        |    |          |                     |               |                     |                               |                |                             |                           |                      |                   |
| USA            | Y      | 89 | 75.0     | 69.4 (6.2)          | Y             | Moderate            | Educational                   | 12             | NA                          | NA                        | Post, 12 weeks       | GDS, HAM-D        |
| USA            | Y      | 89 | 70.0     | 69.2 (6.9)          | Y             | Moderate            | Tai-chi / Qigong              | 12             | 2                           | 150                       | Post, 12 weeks       | GDS, HAM-D        |
| Lee 2020       |        |    |          |                     |               |                     |                               |                |                             |                           |                      |                   |
| Taiwan         | Y      | 16 | NA       | (65-90)             | Y             | Moderate            | Tai-chi / Qigong              | 12             | 2                           | 300                       | Post                 | PHQ-9             |
| Taiwan         | Y      | 14 | NA       | (65-90)             | Y             | Moderate            | Cognitive behavioural therapy | 12             | NA                          | NA                        | Post                 | PHQ-9             |
| Legrand 2007   |        |    |          |                     |               |                     |                               |                |                             |                           |                      |                   |
| France         | N      | 8  | 71.5     | NA                  | N             | Moderate            | Mixed aerobic exercises       | 8              | 5                           | 648                       | Post                 | BDI-II            |
| France         | N      | 8  | 67.0     | NA                  | N             | Moderate            | Aerobic + Social Support      | 8              | NA                          | NA                        | Post                 | BDI-II            |
| Legrand 2009   |        |    |          |                     |               |                     |                               |                |                             |                           |                      |                   |
| France         | N      | 6  | NA       | 66.8 (2.5)          | N             | Mild                | Walking / Jogging             | 4              | 4                           | 1032                      | Post, 4 weeks        | GDS               |
| France         | N      | 6  | NA       | 66.8 (2.5)          | N             | Mild                | Walking / Jogging             | 4              | 4                           | 108                       | Post, 4 weeks        | GDS               |
| Legrand 2014   |        |    |          |                     |               |                     |                               |                |                             |                           |                      |                   |
| France         | Y      | 22 | 100.0    | 23 (19-30)          | N             | Moderate            | Waitlist control              | 7              | NA                          | NA                        | Post                 | BDI-II            |
| France         | Y      | 22 | 100.0    | 23 (19-30)          | N             | Moderate            | Mixed aerobic exercises       | 7              | 5                           | 648                       | Post                 | BDI-II            |
| Legrand 2016   |        |    |          |                     |               |                     |                               |                |                             |                           |                      |                   |
| France         | N      | 11 | 71.0     | 45.3 (13.2)         | N             | Severe              | Stretching                    | 1              | 2                           | NA                        | Post                 | BDI-II            |
| France         | N      | 14 | 71.0     | 45.3 (13.2)         | N             | Severe              | Walking / Jogging             | 1              | 4                           | 194                       | Post                 | BDI-II            |
| France         | N      | 10 | 71.0     | 45.3 (13.2)         | N             | Severe              | SSRI                          | 1              | NA                          | NA                        | Post                 | BDI-II            |

| Country           | Funded | n   | % Female | Mean Age (SD/Range) | Comorbidities | Baseline Depression | Treatment                     | Length (weeks) | Intensity prescribed (METs) | Exercise dose (METs/week) | Timepoints available    | Outcomes measured |
|-------------------|--------|-----|----------|---------------------|---------------|---------------------|-------------------------------|----------------|-----------------------------|---------------------------|-------------------------|-------------------|
| Levin 2016        |        |     |          |                     |               |                     |                               |                |                             |                           |                         |                   |
| Australia         | N      | 14  | NA       | 58.9 (10.8)         | N             | Mild                | Waitlist control              | NA             | NA                          | NA                        | Post                    | HADS              |
| Australia         | N      | 8   | NA       | 58.9 (10.8)         | N             | Mild                | Aerobic + Strength            | 12             | 4                           | 600                       | Post                    | HADS              |
| Australia         | N      | 10  | NA       | 58.9 (10.8)         | N             | Mild                | Aerobic + Strength            | 12             | 4                           | 668                       | Post                    | HADS              |
| Liao 2018         |        |     |          |                     |               |                     |                               |                |                             |                           |                         |                   |
| Malaysia          | Y      | 52  | 63.0     | 71.79 (7.713)       | N             | Mild                | Educational                   | 13             | NA                          | NA                        | Post                    | GDS               |
| Malaysia          | Y      | 55  | 60.0     | 71.79 (7.713)       | N             | Mild                | Tai-chi / Qigong              | 13             | 2                           | 375                       | Post                    | GDS               |
| Lok 2017          |        |     |          |                     |               |                     |                               |                |                             |                           |                         |                   |
| Turkey            | N      | 40  | 45.0     | (65-90)             | N             | Mild                | Waitlist control              | 10             | NA                          | NA                        | Post                    | BDI-II            |
| Turkey            | N      | 40  | 45.0     | (65-90)             | N             | Mild                | Mixed aerobic exercises       | 10             | 5                           | 1512                      | Post                    | BDI-II            |
| Lu 2022           |        |     |          |                     |               |                     |                               |                |                             |                           |                         |                   |
| China             | N      | 52  | 100.0    | 52.25 (12.3)        | Y             | Mild                | Self guided physical activity | 10             | 4                           | 202                       | Post                    | HAM-D             |
| China             | N      | 52  | 100.0    | 54.12 (10.25)       | Y             | Mild                | Aerobic + Diet                | NA             | NA                          | NA                        | Post                    | HAM-D             |
| Luttenberger 2015 |        |     |          |                     |               |                     |                               |                |                             |                           |                         |                   |
| Germany           | Y      | 26  | 52.0     | 43.91 (11.91)       | N             | Moderate            | Usual care                    | 8              | NA                          | NA                        | Post                    | BDI-II            |
| Germany           | Y      | 25  | 54.0     | 43.91 (11.91)       | N             | Moderate            | Strength                      | 8              | 6                           | 1044                      | Post, 8 weeks, 16 weeks | BDI-II            |
| Ma 2019           |        |     |          |                     |               |                     |                               |                |                             |                           |                         |                   |
| USA               | Y      | 205 | 70.0     | NA                  | N             | Moderate            | Usual care                    | 52             | NA                          | NA                        | Post                    | SCL-20            |
| USA               | Y      | 204 | 70.0     | NA                  | N             | Moderate            | Walking / Jogging             | 52             | 4                           | 645                       | Post                    | SCL-20            |
| Maddux 2018       |        |     |          |                     |               |                     |                               |                |                             |                           |                         |                   |

| Country        | Funded | n  | % Female | Mean Age (SD/Range) | Comorbidities | Baseline Depression | Treatment                     | Length (weeks) | Intensity prescribed (METs) | Exercise dose (METs/week) | Timepoints available | Outcomes measured |
|----------------|--------|----|----------|---------------------|---------------|---------------------|-------------------------------|----------------|-----------------------------|---------------------------|----------------------|-------------------|
| Sweden         | N      | 25 | 70.0     | 47.1 (10.4)         | N             | Moderate            | Waitlist control              | NA             | NA                          | NA                        | Post                 | HADS              |
| Sweden         | N      | 31 | 93.0     | 45.5 (10)           | N             | Moderate            | Yoga                          | 8              | 4                           | 480                       | Post                 | HADS              |
| Maharaj 2023   |        |    |          |                     |               |                     |                               |                |                             |                           |                      |                   |
| Nigeria        | N      | 24 | 100.0    | 39.9 (5.77)         | Y             | Moderate            | Educational                   | NA             | NA                          | NA                        | Post                 | BDI               |
| Nigeria        | N      | 25 | 100.0    | 40.4 (7.22)         | Y             | Moderate            | Walking / Jogging             | 12             | 4                           | 677                       | Post                 | BDI               |
| Makizako 2020  |        |    |          |                     |               |                     |                               |                |                             |                           |                      |                   |
| Japan          | Y      | 28 | 51.0     | 73.1 (5.5)          | Y             | Mild                | Educational                   | 20             | NA                          | NA                        | Post, 6 weeks        | GDS-15            |
| Japan          | Y      | 27 | 51.0     | 73.1 (5.5)          | Y             | Mild                | Strength                      | 20             | 4                           | 331                       | Post, 6 weeks        | GDS-15            |
| Margolis 1982  |        |    |          |                     |               |                     |                               |                |                             |                           |                      |                   |
| USA            | N      | 14 | 77.0     | 44.5 (NA)           | N             | Moderate            | Aerobic + Therapy             | 10             | NA                          | NA                        | Post                 | BDI-II            |
| USA            | N      | 15 | 74.5     | 44.5 (NA)           | N             | Moderate            | Cognitive behavioural therapy | 10             | NA                          | NA                        | Post                 | BDI-II            |
| Martinsen 1985 |        |    |          |                     |               |                     |                               |                |                             |                           |                      |                   |
| Norway         | Y      | 19 | NA       | 40 (17-60)          | N             | Severe              | Usual care                    | NA             | NA                          | NA                        | Post                 | BDI               |
| Norway         | Y      | 24 | NA       | 40 (17-60)          | N             | Moderate            | Mixed aerobic exercises       | 9              | 4                           | 774                       | Post                 | BDI               |
| Martinsen 1989 |        |    |          |                     |               |                     |                               |                |                             |                           |                      |                   |
| Norway         | Y      | 51 | 62.0     | NA                  | N             | Mild                | Mixed aerobic exercises       | 8              | 7                           | 1260                      | Post                 | MADRS             |
| Norway         | Y      | 47 | 67.0     | NA                  | Y             | Mild                | Strength                      | 8              | 4                           | 630                       | Post                 | MADRS             |
| Martiny 2012   |        |    |          |                     |               |                     |                               |                |                             |                           |                      |                   |
| Denmark        | Y      | 38 | NA       | NA                  | N             | Moderate            | Exercise + SSRI               | 9              | NA                          | NA                        | Post, 20 weeks       | HAM-D             |
| Denmark        | Y      | 37 | NA       | NA                  | N             | Moderate            | Sleep deprivation + SSRI      | 9              | NA                          | NA                        | Post, 20 weeks       | HAM-D             |
| McCann 1984    |        |    |          |                     |               |                     |                               |                |                             |                           |                      |                   |
| USA            | Y      | 16 | 100.0    | NA                  | N             | Mild                | Waitlist control              | 10             | NA                          | NA                        | Post                 | BDI               |
| USA            | Y      | 16 | 100.0    | NA                  | N             | Mild                | Walking / Jogging             | 10             | 4                           | 540                       | Post                 | BDI               |
| USA            | Y      | 15 | 100.0    | NA                  | N             | Mild                | Relaxation                    | 10             | NA                          | NA                        | Post                 | BDI               |

| Country            | Funded | n  | % Female | Mean Age (SD/Range) | Comorbidities | Baseline Depression | Treatment                               | Length (weeks) | Intensity prescribed (METs) | Exercise dose (METs/week) | Timepoints available | Outcomes measured |
|--------------------|--------|----|----------|---------------------|---------------|---------------------|-----------------------------------------|----------------|-----------------------------|---------------------------|----------------------|-------------------|
| McMurdo 2001       |        |    |          |                     |               |                     |                                         |                |                             |                           |                      |                   |
| UK                 | Y      | 43 | NA       | NA                  | N             | Severe              | Educational                             | 10             | NA                          | NA                        | Post, 24 weeks       | GDS, HRSD         |
| UK                 | Y      | 43 | NA       | NA                  | N             | Severe              | Educational                             | 0              | NA                          | NA                        | Post, 24 weeks       | GDS, HRSD         |
| UK                 | Y      | 43 | NA       | NA                  | N             | Moderate            | Aerobic + Strength                      | 10             | 6                           | 495                       | Post, 24 weeks       | GDS, HRSD         |
| Meleppurakkal 2021 |        |    |          |                     |               |                     |                                         |                |                             |                           |                      |                   |
| India              | N      | 25 | NA       | NA                  | N             | Mild                | Placebo pill                            | NA             | NA                          | NA                        | Post, 2 weeks        | HAM-D             |
| India              | N      | 25 | NA       | NA                  | N             | Mild                | Yoga                                    | 4              | 2                           | NA                        | Post, 2 weeks        | HAM-D             |
| India              | N      | 25 | NA       | NA                  | N             | Mild                | Yoga + Herbal Formula                   | 4              | 2                           | NA                        | Post, 2 weeks        | HAM-D             |
| Meyer 2022         |        |    |          |                     |               |                     |                                         |                |                             |                           |                      |                   |
| USA                | Y      | 5  | 80.0     | 46 (35–59)          | Y             | Unclear             | Aerobic + Cognitive behavioural therapy | 8              | 4                           | 129                       | Post, 12 weeks       | HAM-D, PHQ-9      |
| USA                | Y      | 5  | 100.0    | 44 (19–51)          | Y             | Unclear             | Cognitive behavioural therapy           | NA             | NA                          | NA                        | Post, 12 weeks       | HAM-D, PHQ-9      |
| Minghetti 2018     |        |    |          |                     |               |                     |                                         |                |                             |                           |                      |                   |
| Switzerland        | Y      | 29 | 79.0     | NA                  | N             | Severe              | Cycling                                 | 4              | 7                           | 735                       | Post                 | BDI-II            |
| Switzerland        | Y      | 30 | 77.0     | NA                  | N             | Severe              | Cycling                                 | 4              | 5                           | 567                       | Post                 | BDI-II            |
| Mitchell 2012      |        |    |          |                     |               |                     |                                         |                |                             |                           |                      |                   |
| USA                | Y      | 12 | 100.0    | 26.6 (NA)           | N             | Mild                | Educational                             | 12             | NA                          | NA                        | Post                 | CES-D             |
| USA                | Y      | 12 | 100.0    | 26.6 (NA)           | N             | Severe              | Yoga                                    | 12             | 2                           | 100                       | Post                 | CES-D             |
| Mitchell 2014      |        |    |          |                     |               |                     |                                         |                |                             |                           |                      |                   |
| UK                 | Y      | 95 | 44.0     | NA                  | Y             | Mild                | Usual care                              | 6              | NA                          | NA                        | Post, 18 weeks       | CES-D             |
| UK                 | Y      | 89 | 47.0     | NA                  | Y             | Mild                | Aerobic + Strength                      | 6              | 4                           | 790                       | Post, 18 weeks       | CES-D             |
| Moncrieft 2016     |        |    |          |                     |               |                     |                                         |                |                             |                           |                      |                   |
| USA                | Y      | 54 | 73.0     | 54.81 (7.36)        | N             | Moderate            | Usual care                              | 52             | NA                          | NA                        | Post                 | BDI-II            |

| Country                  | Funded | n  | % Female | Mean Age (SD/Range) | Comorbidities | Baseline Depression | Treatment               | Length (weeks) | Intensity prescribed (METs) | Exercise dose (METs/week) | Timepoints available | Outcomes measured |
|--------------------------|--------|----|----------|---------------------|---------------|---------------------|-------------------------|----------------|-----------------------------|---------------------------|----------------------|-------------------|
| USA                      | Y      | 57 | 69.0     | 54.81 (7.36)        | N             | Moderate            | Aerobic + Therapy       | 52             | NA                          | NA                        | Post                 | BDI-II            |
| Morales 2020             |        |    |          |                     |               |                     |                         |                |                             |                           |                      |                   |
| Brazil                   | Y      | 7  | NA       | NA                  | Y             | Moderate            | Aerobic + Strength      | 12             | 3                           | 168                       | Post                 | BDI, HAM-D        |
| Brazil                   | Y      | 9  | NA       | NA                  | Y             | Moderate            | Mixed aerobic exercises | 12             | 6                           | 354                       | Post                 | BDI, HAM-D        |
| Brazil                   | Y      | 9  | NA       | NA                  | Y             | Moderate            | Strength                | 12             | 4                           | 210                       | Post                 | BDI, HAM-D        |
| Mosquera-Valderrama 2012 |        |    |          |                     |               |                     |                         |                |                             |                           |                      |                   |
| Colombia                 | Y      | 7  | 100.0    | 21 (3)              | N             | Severe              | Educational             | 12             | NA                          | NA                        | Post                 | CES-D             |
| Colombia                 | Y      | 7  | 100.0    | 21 (3)              | N             | Severe              | Mixed aerobic exercises | 12             | 2                           | 639                       | Post                 | CES-D             |
| Mota-Pereira 2011        |        |    |          |                     |               |                     |                         |                |                             |                           |                      |                   |
| Portugal                 | Y      | 10 | 80.0     | 45.33 (3.11)        | N             | Mild                | Usual care              | 12             | NA                          | NA                        | Post                 | BDI, HAM-D        |
| Portugal                 | Y      | 19 | 58.0     | 48.68 (2.3)         | N             | Moderate            | Walking / Jogging       | 12             | 4                           | 817                       | Post                 | BDI, HAM-D        |
| Motl 2020                |        |    |          |                     |               |                     |                         |                |                             |                           |                      |                   |
| USA                      | Y      | 13 | 62.0     | (18-64)             | Y             | Moderate            | Waitlist control        | 26             | NA                          | NA                        | Post                 | HADS              |
| USA                      | Y      | 13 | 62.0     | (18-64)             | Y             | Moderate            | Walking / Jogging       | 26             | NA                          | NA                        | Post                 | HADS              |
| Mutrie 1986              |        |    |          |                     |               |                     |                         |                |                             |                           |                      |                   |
| UK                       | Y      | 7  | 95.0     | 41.1 (NA)           | N             | Moderate            | Waitlist control        | 4              | NA                          | NA                        | Post                 | BDI               |
| UK                       | Y      | 9  | 74.0     | 45.7 (NA)           | N             | Moderate            | Mixed aerobic exercises | 4              | 5                           | 486                       | Post                 | BDI               |
| UK                       | Y      | 8  | 83.0     | 38.9 (NA)           | N             | Moderate            | Strength                | 4              | 2                           | 285                       | Post                 | BDI               |
| Nabkasorn 2006           |        |    |          |                     |               |                     |                         |                |                             |                           |                      |                   |
| Japan                    | N      | 28 | 100.0    | 18.8 (0.1)          | N             | Mild                | Usual care              | NA             | NA                          | NA                        | Post                 | CES-D             |
| Japan                    | N      | 21 | 100.0    | 18.7 (0.2)          | N             | Mild                | Walking / Jogging       | 8              | 4                           | 1075                      | Post                 | CES-D             |
| Nasstasia 2019           |        |    |          |                     |               |                     |                         |                |                             |                           |                      |                   |
| Australia                | Y      | 34 | 78.0     | 20.75 (2.59)        | N             | Severe              | Waitlist control        | NA             | NA                          | NA                        | Post, 12 weeks       | BDI-II            |

| Country       | Funded | n  | % Female | Mean Age (SD/Range) | Comorbidities | Baseline Depression | Treatment                               | Length (weeks) | Intensity prescribed (METs) | Exercise dose (METs/week) | Timepoints available | Outcomes measured |
|---------------|--------|----|----------|---------------------|---------------|---------------------|-----------------------------------------|----------------|-----------------------------|---------------------------|----------------------|-------------------|
| Australia     | Y      | 34 | 78.0     | 20.75 (2.59)        | N             | Severe              | Aerobic + Strength                      | 12             | 5                           | 801                       | Post, 12 weeks       | BDI-II            |
| Naumann 2020  |        |    |          |                     |               |                     |                                         |                |                             |                           |                      |                   |
| Germany       | Y      | 23 | 87.0     | 51 (9.8)            | N             | Severe              | Aerobic + Strength                      | 8              | 6                           | 495                       | Post                 | BDI-II, HAM-D     |
| Germany       | Y      | 22 | 59.0     | 45.6 (12.3)         | N             | Severe              | Hyperthermic bath                       | NA             | NA                          | NA                        | Post                 | BDI-II, HAM-D     |
| Newcombe 2023 |        |    |          |                     |               |                     |                                         |                |                             |                           |                      |                   |
| Canada        | N      | 9  | 75.0     | 21.81 (3.78)        | N             | Moderate            | Usual care                              | NA             | NA                          | NA                        | Post                 | DASS              |
| Canada        | N      | 7  | 75.0     | 21.81 (3.78)        | N             | Moderate            | Aerobic + Cognitive behavioural therapy | 7              | 6                           | 390                       | Post                 | DASS              |
| Norouzi 2020  |        |    |          |                     |               |                     |                                         |                |                             |                           |                      |                   |
| Iran          | Y      | 20 | 100.0    | NA                  | Y             | Severe              | Social                                  | 12             | NA                          | NA                        | Post                 | BDI               |
| Iran          | Y      | 20 | 100.0    | NA                  | Y             | Severe              | Dance                                   | 12             | 7                           | 1314                      | Post                 | BDI               |
| Iran          | Y      | 20 | 100.0    | NA                  | Y             | Severe              | Walking / Jogging                       | 12             | 5                           | 972                       | Post                 | BDI               |
| Norouzi 2023  |        |    |          |                     |               |                     |                                         |                |                             |                           |                      |                   |
| Iran          | Y      | 17 | 59.0     | 33.21 (5.72)        | N             | Severe              | Mixed aerobic exercises                 | 8              | 8                           | 752                       | Post, 4 weeks        | BDI               |
| Iran          | Y      | 16 | 59.0     | 33.21 (5.72)        | N             | Severe              | Aerobic + Meditation                    | 8              | 5                           | 450                       | Post, 4 weeks        | BDI               |
| Iran          | Y      | 17 | 59.0     | 33.21 (5.72)        | N             | Severe              | Mind-body + Therapy                     | 8              | 1                           | 117                       | Post, 4 weeks        | BDI               |
| Nyström 2017  |        |    |          |                     |               |                     |                                         |                |                             |                           |                      |                   |
| Sweden        | Y      | 55 | 76.0     | 42 (13.5)           | N             | Moderate            | Usual care                              | 12             | NA                          | NA                        | Post                 | PHQ-9             |
| Sweden        | Y      | 65 | 76.0     | 42 (13.5)           | N             | Moderate            | Aerobic + Strength                      | 12             | NA                          | NA                        | Post                 | PHQ-9             |
| Sweden        | Y      | 71 | 76.0     | 42 (13.5)           | N             | Moderate            | Cognitive behavioural therapy           | 12             | NA                          | NA                        | Post                 | PHQ-9             |
| Olson 2017    |        |    |          |                     |               |                     |                                         |                |                             |                           |                      |                   |



| Country       | Funded | n  | % Female | Mean Age (SD/Range) | Comorbidities | Baseline Depression | Treatment               | Length (weeks) | Intensity prescribed (METs) | Exercise dose (METs/week) | Timepoints available    | Outcomes measured |
|---------------|--------|----|----------|---------------------|---------------|---------------------|-------------------------|----------------|-----------------------------|---------------------------|-------------------------|-------------------|
| USA           | Y      | 15 | 80.0     | 21.1 (2)            | N             | Moderate            | Mixed aerobic exercises | 8              | 5                           | 616                       | Post                    | BDI-II            |
| USA           | Y      | 15 | 80.0     | 21.1 (2)            | N             | Moderate            | Stretching              | 8              | 2                           | NA                        | Post                    | BDI-II            |
| Oretzky 2007  |        |    |          |                     |               |                     |                         |                |                             |                           |                         |                   |
| USA           | N      | 24 | 50.5     | 25.6 (3.22)         | N             | Moderate            | Waitlist control        | 5              | NA                          | NA                        | Post                    | BDI-II, HRSD      |
| USA           | N      | 29 | 38.0     | 25.6 (3.22)         | N             | Moderate            | Yoga                    | 5              | 2                           | 300                       | Post                    | BDI-II, HRSD      |
| Ouyang 2001   |        |    |          |                     |               |                     |                         |                |                             |                           |                         |                   |
| China         | N      | 29 | 50.0     | 19.8 (NA)           | N             | Mild                | Waitlist control        | NA             | NA                          | NA                        | Post                    | BDI               |
| China         | N      | 30 | 48.0     | 19.8 (NA)           | N             | Mild                | Aerobic + Therapy       | 3              | 5                           | 972                       | Post                    | BDI               |
| Ozkan 2020    |        |    |          |                     |               |                     |                         |                |                             |                           |                         |                   |
| Turkey        | N      | 40 | 81.0     | 28.9 (4.83)         | N             | Moderate            | Usual care              | 4              | NA                          | NA                        | Post                    | EPDS              |
| Turkey        | N      | 40 | 81.0     | 28.9 (4.83)         | N             | Moderate            | Aerobic + Strength      | 4              | 3                           | 790                       | Post                    | EPDS              |
| Pagoto 2013   |        |    |          |                     |               |                     |                         |                |                             |                           |                         |                   |
| USA           | Y      | 83 | 100.0    | 45.9 (10.8)         | Y             | Moderate            | Educational             | 26             | NA                          | NA                        | Post, 26 weeks          | BDI-II, HRSD      |
| USA           | Y      | 78 | 100.0    | 45.9 (10.8)         | Y             | Moderate            | Aerobic + Therapy       | 26             | NA                          | NA                        | Post, 26 weeks          | BDI-II, HRSD      |
| Passmore 2006 |        |    |          |                     |               |                     |                         |                |                             |                           |                         |                   |
| USA           | N      | 11 | 70.0     | 35.1 (11.49)        | N             | Severe              | Aerobic + Strength      | 3              | 4                           | 642                       | Post, 6 weeks, 12 weeks | BDI-II            |
| USA           | N      | 10 | 64.0     | 35.1 (11.49)        | N             | Severe              | Mixed aerobic exercises | 3              | 5                           | 651                       | Post, 6 weeks, 12 weeks | BDI-II            |
| Patten 2017   |        |    |          |                     |               |                     |                         |                |                             |                           |                         |                   |
| USA           | Y      | 15 | 100.0    | NA                  | Y             | Moderate            | Educational             | 12             | NA                          | NA                        | Post                    | PHQ-9             |
| USA           | Y      | 13 | 100.0    | NA                  | Y             | Moderate            | Mixed aerobic exercises | 12             | 2                           | 562                       | Post                    | PHQ-9             |
| Patten 2018   |        |    |          |                     |               |                     |                         |                |                             |                           |                         |                   |
| USA           | Y      | 18 | 86.0     | 42.1 (10)           | N             | Moderate            | Waitlist control        | 12             | NA                          | NA                        | Post                    | BDI-II            |
| USA           | Y      | 18 | 86.0     | 42.1 (10)           | N             | Moderate            | Aerobic + Strength      | 12             | 4                           | 134                       | Post                    | BDI-II            |

| Country          | Funded | n  | % Female | Mean Age (SD/Range) | Comorbidities | Baseline Depression | Treatment                     | Length (weeks) | Intensity prescribed (METs) | Exercise dose (METs/week) | Timepoints available | Outcomes measured |
|------------------|--------|----|----------|---------------------|---------------|---------------------|-------------------------------|----------------|-----------------------------|---------------------------|----------------------|-------------------|
| Pentecost 2015   |        |    |          |                     |               |                     |                               |                |                             |                           |                      |                   |
| UK               | Y      | 30 | 48.0     | (18-65)             | N             | Moderate            | Aerobic + Therapy             | 16             | NA                          | NA                        | Post                 | PHQ-9             |
| UK               | Y      | 30 | 48.0     | (18-65)             | N             | Moderate            | Cognitive behavioural therapy | 16             | NA                          | NA                        | Post                 | PHQ-9             |
| Phillips 2018    |        |    |          |                     |               |                     |                               |                |                             |                           |                      |                   |
| USA              | N      | 16 | 66.0     | (18-30)             | N             | Moderate            | Educational                   | NA             | NA                          | NA                        | Post                 | BDI-II            |
| USA              | N      | 16 | 66.0     | (18-30)             | N             | Moderate            | Dance                         | 4              | 8                           | 234                       | Post                 | BDI-II            |
| Pilu 2007        |        |    |          |                     |               |                     |                               |                |                             |                           |                      |                   |
| Italy            | Y      | 10 | 100.0    | (40-60)             | Y             | Moderate            | Exercise + SSRI               | 35             | 2                           | 401                       | Post                 | HAM-D             |
| Italy            | Y      | 20 | 100.0    | (40-60)             | Y             | Moderate            | SSRI                          | 35             | NA                          | NA                        | Post                 | HAM-D             |
| Prakhinkit 2014  |        |    |          |                     |               |                     |                               |                |                             |                           |                      |                   |
| Thailand         | Y      | 15 | 100.0    | (60-90)             | N             | Mild                | Waitlist control              | 12             | NA                          | NA                        | Post                 | GDS               |
| Thailand         | Y      | 15 | 100.0    | (60-90)             | N             | Mild                | Aerobic + Meditation          | 12             | NA                          | NA                        | Post                 | GDS               |
| Prathikanti 2017 |        |    |          |                     |               |                     |                               |                |                             |                           |                      |                   |
| USA              | Y      | 18 | 68.0     | 43.4 (14.8)         | N             | Moderate            | Educational                   | 8              | NA                          | NA                        | Post                 | BDI               |
| USA              | Y      | 20 | 68.0     | 43.4 (14.8)         | N             | Moderate            | Yoga                          | 8              | 2                           | 300                       | Post                 | BDI               |
| Puterman 2022    |        |    |          |                     |               |                     |                               |                |                             |                           |                      |                   |
| Canada           | Y      | 43 | 89.0     | 41 (12.1)           | N             | Mild                | Waitlist control              | NA             | NA                          | NA                        | Post                 | CES-D             |
| Canada           | Y      | 43 | 87.0     | 41.2 (12.7)         | N             | Mild                | Aerobic + Strength            | 6              | 6                           | 480                       | Post                 | CES-D             |
| Canada           | Y      | 43 | 87.0     | 41.1 (12.6)         | N             | Mild                | Aerobic + Strength + Yoga     | 6              | 4                           | 340                       | Post                 | CES-D             |
| Canada           | Y      | 43 | 84.0     | 37.8 (12.3)         | N             | Mild                | Yoga                          | 6              | 2                           | 200                       | Post                 | CES-D             |
| Rashidi 2013     |        |    |          |                     |               |                     |                               |                |                             |                           |                      |                   |
| Iran             | N      | 20 | 100.0    | (55-65)             | N             | Mild                | Waitlist control              | 8              | 3                           | 360                       | Post                 | BDI               |
| Iran             | N      | 20 | 100.0    | (55-65)             | N             | Mild                | Pilates                       | 8              | 3                           | 360                       | Post                 | BDI               |
| Ravindran 2021   |        |    |          |                     |               |                     |                               |                |                             |                           |                      |                   |

| Country      | Funded | n  | % Female | Mean Age (SD/Range) | Comorbidities | Baseline Depression | Treatment                     | Length (weeks) | Intensity prescribed (METs) | Exercise dose (METs/week) | Timepoints available | Outcomes measured |
|--------------|--------|----|----------|---------------------|---------------|---------------------|-------------------------------|----------------|-----------------------------|---------------------------|----------------------|-------------------|
| Canada       | Y      | 19 | 74.0     | 40.58 (12.72)       | Y             | Mild                | Educational                   | 8              | NA                          | NA                        | Post                 | HAM-D, MADRS      |
| Canada       | Y      | 53 | 81.0     | 39.36 (11.69)       | Y             | Mild                | Yoga                          | 8              | 2                           | 450                       | Post                 | HAM-D, MADRS      |
| Roh 2020     |        |    |          |                     |               |                     |                               |                |                             |                           |                      |                   |
| South Korea  | Y      | 38 | 74.0     | NA                  | Y             | Severe              | Educational                   | 12             | 4                           | NA                        | Post                 | MADRS             |
| South Korea  | Y      | 40 | 74.0     | NA                  | Y             | Severe              | Social                        | 12             | NA                          | NA                        | Post                 | MADRS             |
| Roshan 2011  |        |    |          |                     |               |                     |                               |                |                             |                           |                      |                   |
| Iran         | N      | 12 | 100.0    | NA                  | N             | Severe              | Waitlist control              | NA             | NA                          | NA                        | Post                 | HAM-D             |
| Iran         | N      | 12 | 100.0    | NA                  | N             | Severe              | Walking / Jogging             | 6              | 4                           | 387                       | Post                 | HAM-D             |
| Roy 2018     |        |    |          |                     |               |                     |                               |                |                             |                           |                      |                   |
| India        | Y      | 20 | 100.0    | NA                  | N             | Mild                | Usual care                    | 1              | NA                          | NA                        | Post                 | DSS, HAM-D        |
| India        | Y      | 20 | 100.0    | NA                  | N             | Moderate            | Mixed aerobic exercises       | 1              | 5                           | 108                       | Post                 | DSS, HAM-D        |
| Sadeghi 2006 |        |    |          |                     |               |                     |                               |                |                             |                           |                      |                   |
| Iran         | Y      | 14 | 24.0     | NA                  | N             | Moderate            | Social                        | NA             | NA                          | NA                        | Post                 | BDI-II            |
| Iran         | Y      | 16 | 21.0     | NA                  | N             | Moderate            | Mixed aerobic exercises       | 8              | 5                           | 842                       | Post                 | BDI-II            |
| Iran         | Y      | 16 | 21.0     | NA                  | N             | Moderate            | Cognitive behavioural therapy | 8              | NA                          | NA                        | Post                 | BDI-II            |
| Salchow 2021 |        |    |          |                     |               |                     |                               |                |                             |                           |                      |                   |
| Germany      | Y      | 21 | 100.0    | 51.52 (8.41)        | Y             | Severe              | Waitlist control              | NA             | NA                          | NA                        | Post                 | HADS              |
| Germany      | Y      | 30 | 100.0    | 54.23 (7.85)        | Y             | Severe              | Tai-chi / Qigong              | 24             | 4                           | 666                       | Post                 | HADS              |
| Salehi 2016  |        |    |          |                     |               |                     |                               |                |                             |                           |                      |                   |
| Iran         | Y      | 20 | 35.0     | 29.67 (5.81)        | N             | Severe              | Mixed aerobic exercises       | 4              | 5                           | 729                       | Post                 | BDI, HAM-D        |

| Country        | Funded | n  | % Female | Mean Age (SD/Range) | Comorbidities | Baseline Depression | Treatment                           | Length (weeks) | Intensity prescribed (METs) | Exercise dose (METs/week) | Timepoints available | Outcomes measured |
|----------------|--------|----|----------|---------------------|---------------|---------------------|-------------------------------------|----------------|-----------------------------|---------------------------|----------------------|-------------------|
| Iran           | Y      | 20 | 35.0     | 29.67 (5.81)        | N             | Severe              | Aerobic + Electroconvulsive therapy | 4              | NA                          | NA                        | Post                 | BDI, HAM-D        |
| Iran           | Y      | 20 | 35.0     | 29.67 (5.81)        | N             | Severe              | Electroconvulsive therapy           | 4              | NA                          | NA                        | Post                 | BDI, HAM-D        |
| Sarubin 2014   |        |    |          |                     |               |                     |                                     |                |                             |                           |                      |                   |
| Germany        | Y      | 31 | 24.0     | 40.25 (12.57)       | N             | Moderate            | Waitlist control                    | 5              | NA                          | NA                        | Post                 | HAM-D             |
| Germany        | Y      | 22 | 34.0     | 40.25 (12.57)       | N             | Moderate            | Yoga                                | 5              | 2                           | 150                       | Post                 | HAM-D             |
| Schneider 2016 |        |    |          |                     |               |                     |                                     |                |                             |                           |                      |                   |
| USA            | Y      | 14 | 100.0    | 53.4 (7.1)          | N             | Moderate            | Usual care                          | 24             | NA                          | NA                        | Post                 | BDI, HAM-D        |
| USA            | Y      | 15 | 100.0    | 53.4 (7.1)          | N             | Moderate            | Mixed aerobic exercises             | 24             | 5                           | 972                       | Post                 | BDI, HAM-D        |
| Schuch 2011    |        |    |          |                     |               |                     |                                     |                |                             |                           |                      |                   |
| Brazil         | Y      | 11 | NA       | 42.5 (13.5)         | N             | Severe              | Usual care                          | NA             | NA                          | NA                        | Post                 | HAM-D             |
| Brazil         | Y      | 15 | NA       | 42.8 (12.4)         | N             | Severe              | Mixed aerobic exercises             | NA             | 5                           | 486                       | Post                 | HAM-D             |
| Schuch 2015    |        |    |          |                     |               |                     |                                     |                |                             |                           |                      |                   |
| Brazil         | Y      | 25 | 74.0     | NA                  | N             | Severe              | Usual care                          | NA             | NA                          | NA                        | Post                 | HAM-D             |
| Brazil         | Y      | 25 | 74.0     | NA                  | N             | Severe              | Mixed aerobic exercises             | NA             | 5                           | 648                       | Post                 | HAM-D             |
| Schuver 2016   |        |    |          |                     |               |                     |                                     |                |                             |                           |                      |                   |
| USA            | N      | 16 | 100.0    | 42.68 (4.95)        | N             | Moderate            | Walking / Jogging                   | 12             | 4                           | 559                       | Post, 4 weeks        | BDI               |
| USA            | N      | 18 | 100.0    | 42.68 (4.95)        | N             | Moderate            | Yoga                                | 12             | 2                           | 340                       | Post, 4 weeks        | BDI               |
| Setaro 1986    |        |    |          |                     |               |                     |                                     |                |                             |                           |                      |                   |
| USA            | N      | 25 | 74.0     | (18-35)             | N             | Moderate            | Social                              | 10             | NA                          | NA                        | Post                 | MMPI              |
| USA            | N      | 25 | 74.0     | (18-35)             | N             | Moderate            | Waitlist control                    | 10             | NA                          | NA                        | Post                 | MMPI              |
| USA            | N      | 25 | 74.0     | (18-35)             | N             | Moderate            | Dance                               | 10             | 5                           | 324                       | Post                 | MMPI              |

| Country             | Funded | n  | % Female | Mean Age (SD/Range) | Comorbidities | Baseline Depression | Treatment                               | Length (weeks) | Intensity prescribed (METs) | Exercise dose (METs/week) | Timepoints available | Outcomes measured |
|---------------------|--------|----|----------|---------------------|---------------|---------------------|-----------------------------------------|----------------|-----------------------------|---------------------------|----------------------|-------------------|
| USA                 | N      | 25 | 74.0     | (18-35)             | N             | Moderate            | Aerobic + Cognitive behavioural therapy | 10             | NA                          | NA                        | Post                 | MMPI              |
| USA                 | N      | 25 | 74.0     | (18-35)             | N             | Moderate            | Cognitive behavioural therapy           | 10             | NA                          | NA                        | Post                 | MMPI              |
| USA                 | N      | 25 | 74.0     | (18-35)             | N             | Moderate            | Other behavioral therapies              | 10             | NA                          | NA                        | Post                 | MMPI              |
| Sexton 1989         |        |    |          |                     |               |                     |                                         |                |                             |                           |                      |                   |
| Norway              | N      | 28 | 50.0     | NA                  | Y             | Moderate            | Walking / Jogging                       | 8              | 7                           | 840                       | Post, 24 weeks       | BDI               |
| Norway              | N      | 25 | 56.0     | NA                  | Y             | Moderate            | Walking / Jogging                       | 8              | 4                           | 516                       | Post, 24 weeks       | BDI               |
| Shachar-Malach 2015 |        |    |          |                     |               |                     |                                         |                |                             |                           |                      |                   |
| Israel              | Y      | 6  | 75.0     | NA                  | N             | Severe              | Stretching                              | 3              | 2                           | NA                        | Post, 1 week         | BDI, HAM-D        |
| Israel              | Y      | 6  | 75.0     | NA                  | N             | Severe              | Walking / Jogging                       | 3              | 4                           | 516                       | Post, 1 week         | BDI, HAM-D        |
| Shahidi 2011        |        |    |          |                     |               |                     |                                         |                |                             |                           |                      |                   |
| Iran                | N      | 20 | 100.0    | 68.4 (6.3)          | N             | Mild                | Waitlist control                        | NA             | NA                          | NA                        | Post                 | GDS               |
| Iran                | N      | 20 | 100.0    | 65.7 (4.2)          | N             | Mild                | Walking / Jogging                       | 10             | 4                           | 129                       | Post                 | GDS               |
| Iran                | N      | 20 | 100.0    | 65.5 (4.8)          | N             | Mild                | Laughter yoga                           | 10             | 2                           | NA                        | Post                 | GDS               |
| Sims 2005           |        |    |          |                     |               |                     |                                         |                |                             |                           |                      |                   |
| Australia           | Y      | 22 | 41.0     | 67.13 (15.23)       | N             | Severe              | Usual care                              | 10             | NA                          | NA                        | Post, 14 weeks       | CES-D             |
| Australia           | Y      | 23 | 39.0     | 67.13 (15.23)       | N             | Mild                | Strength                                | 10             | 2                           | 366                       | Post, 14 weeks       | CES-D             |
| Sims 2009           |        |    |          |                     |               |                     |                                         |                |                             |                           |                      |                   |
| Australia           | Y      | 22 | 41.0     | 66.27 (16.01)       | N             | Severe              | Usual care                              | 10             | NA                          | NA                        | Post, 26 weeks       | CES-D             |
| Australia           | Y      | 23 | 39.0     | 67.95 (14.76)       | N             | Mild                | Strength                                | 10             | 4                           | 315                       | Post, 26 weeks       | CES-D             |
| Singh 1996          |        |    |          |                     |               |                     |                                         |                |                             |                           |                      |                   |
| USA                 | Y      | 15 | 33.0     | NA                  | N             | Moderate            | Educational                             | 10             | NA                          | NA                        | Post                 | BDI, GDS, HRSD    |

| Country       | Funded | n  | % Female | Mean Age (SD/Range) | Comorbidities | Baseline Depression | Treatment         | Length (weeks) | Intensity prescribed (METs) | Exercise dose (METs/week) | Timepoints available | Outcomes measured |
|---------------|--------|----|----------|---------------------|---------------|---------------------|-------------------|----------------|-----------------------------|---------------------------|----------------------|-------------------|
| USA           | Y      | 17 | 29.0     | NA                  | N             | Moderate            | Strength          | 10             | 5                           | 750                       | Post                 | BDI, GDS, HRSD    |
| Singh 1997    |        |    |          |                     |               |                     |                   |                |                             |                           |                      |                   |
| USA           | Y      | 15 | 53.0     | 72 (2)              | N             | Moderate            | Educational       | NA             | NA                          | NA                        | Post                 | BDI, HAM-D        |
| USA           | Y      | 17 | 71.0     | 70 (1.5)            | N             | Moderate            | Strength          | 10             | 2                           | 507                       | Post                 | BDI, HAM-D        |
| Singh 2001    |        |    |          |                     |               |                     |                   |                |                             |                           |                      |                   |
| Australia     | Y      | 15 | 63.0     | 71 (2)              | N             | Moderate            | Educational       | 10             | NA                          | NA                        | Post, 84 weeks       | BDI               |
| Australia     | Y      | 17 | 63.0     | 71 (2)              | N             | Moderate            | Strength          | 10             | 5                           | 750                       | Post, 84 weeks       | BDI               |
| Singh 2005    |        |    |          |                     |               |                     |                   |                |                             |                           |                      |                   |
| Australia     | N      | 19 | 53.0     | 69 (7)              | Y             | Moderate            | Usual care        | NA             | NA                          | NA                        | Post                 | GDS, HAM-D        |
| Australia     | N      | 17 | 47.0     | 70 (7)              | Y             | Severe              | Strength          | 8              | 2                           | 664                       | Post                 | GDS, HAM-D        |
| Australia     | N      | 18 | 50.0     | 69 (5)              | Y             | Severe              | Strength          | 8              | 2                           | 934                       | Post                 | GDS, HAM-D        |
| Siqueira 2016 |        |    |          |                     |               |                     |                   |                |                             |                           |                      |                   |
| Brazil        | Y      | 29 | 35.0     | 38.83 (10.72)       | N             | Severe              | Exercise + SSRI   | 4              | NA                          | NA                        | Post                 | BDI, HAM-D        |
| Brazil        | Y      | 28 | 37.0     | 38.83 (10.72)       | N             | Severe              | SSRI              | 4              | NA                          | NA                        | Post                 | BDI, HAM-D        |
| Sjösten 2008  |        |    |          |                     |               |                     |                   |                |                             |                           |                      |                   |
| Finland       | Y      | 35 | NA       | NA                  | N             | Mild                | Usual care        | NA             | NA                          | NA                        | Post                 | GDS               |
| Finland       | Y      | 34 | NA       | NA                  | N             | Mild                | Aerobic + Therapy | 52             | NA                          | NA                        | Post                 | GDS               |
| Streeter 2017 |        |    |          |                     |               |                     |                   |                |                             |                           |                      |                   |
| USA           | Y      | 15 | NA       | NA                  | N             | Moderate            | Yoga              | 12             | 2                           | 1125                      | Post                 | BDI-II, PHQ-9     |
| USA           | Y      | 15 | NA       | NA                  | N             | Moderate            | Yoga              | 12             | 4                           | 2835                      | Post                 | BDI-II, PHQ-9     |
| Strom 2013    |        |    |          |                     |               |                     |                   |                |                             |                           |                      |                   |
| Sweden        | Y      | 24 | 83.0     | 49.2 (10.7)         | N             | Severe              | Waitlist control  | 9              | NA                          | NA                        | Post                 | BDI-II, MADRS     |
| Sweden        | Y      | 24 | 83.0     | 49.2 (10.7)         | N             | Moderate            | Aerobic + Therapy | 9              | NA                          | NA                        | Post, 24 weeks       | BDI-II, MADRS     |

| Country         | Funded | n   | % Female | Mean Age (SD/Range) | Comorbidities | Baseline Depression | Treatment                        | Length (weeks) | Intensity prescribed (METs) | Exercise dose (METs/week) | Timepoints available | Outcomes measured |
|-----------------|--------|-----|----------|---------------------|---------------|---------------------|----------------------------------|----------------|-----------------------------|---------------------------|----------------------|-------------------|
| Sujatha 2019    |        |     |          |                     |               |                     |                                  |                |                             |                           |                      |                   |
| India           | N      | 6   | NA       | NA                  | Y             | Severe              | Mixed aerobic exercises          | 12             | 4                           | 444                       | Post                 | HADS              |
| India           | N      | 6   | NA       | NA                  | Y             | Severe              | Strength                         | 12             | 4                           | 388                       | Post                 | HADS              |
| Sun 2022a       |        |     |          |                     |               |                     |                                  |                |                             |                           |                      |                   |
| China           | Y      | 30  | 43.0     | 65.23 (6.29)        | Y             | Mild                | Rehabilitation exercise          | 3              | 2                           | 966                       | Post, 1 week         | HAM-D 24          |
| China           | Y      | 30  | 43.0     | 62.03 (7.37)        | Y             | Mild                | Qigong + Rehabilitation exercise | 3              | 2                           | 1050                      | Post, 1 week         | HAM-D 24          |
| Sun 2022b       |        |     |          |                     |               |                     |                                  |                |                             |                           |                      |                   |
| China           | Y      | 145 | 81.0     | 33.1 (5.9)          | Y             | Mild                | Strength                         | 12             | 4                           | 420                       | 4 weeks              | BDI               |
| China           | Y      | 141 | 83.0     | 34.5 (6.3)          | Y             | Mild                | Relaxation                       | 12             | NA                          | NA                        | 4 weeks              | BDI               |
| Szuhany 2018    |        |     |          |                     |               |                     |                                  |                |                             |                           |                      |                   |
| USA             | Y      | 15  | 78.0     | 33.7 (13.4)         | N             | Moderate            | Mixed aerobic exercises          | 12             | 5                           | 486                       | Post, 4 weeks        | BDI-II, MADRS     |
| USA             | Y      | 16  | 78.0     | 33.7 (13.4)         | N             | Moderate            | Stretching                       | 12             | 2                           | NA                        | Post, 4 weeks        | BDI-II, MADRS     |
| Szuhany 2020    |        |     |          |                     |               |                     |                                  |                |                             |                           |                      |                   |
| USA             | Y      | 15  | 77.0     | 34.2 (13.4)         | N             | Moderate            | Mixed aerobic exercises          | 12             | 5                           | 810                       | Post, 4 weeks        | BDI-II, MADRS     |
| USA             | Y      | 16  | 77.0     | 34.2 (13.4)         | N             | Moderate            | Stretching                       | 12             | 2                           | NA                        | Post, 4 weeks        | BDI-II, MADRS     |
| Taheri 2018     |        |     |          |                     |               |                     |                                  |                |                             |                           |                      |                   |
| Iran            | N      | 8   | 100.0    | 45 (5.1)            | N             | Mild                | Placebo pill                     | 8              | NA                          | NA                        | Post                 | BDI               |
| Iran            | N      | 8   | 100.0    | 45 (5.1)            | N             | Mild                | Walking / Jogging                | 8              | 4                           | 860                       | Post                 | BDI               |
| Iran            | N      | 8   | 100.0    | 45 (5.1)            | N             | Mild                | Aerobic + Supplementation        | 8              | NA                          | NA                        | Post                 | BDI               |
| Iran            | N      | 8   | 100.0    | 45 (5.1)            | N             | Mild                | Omega 3                          | 8              | NA                          | NA                        | Post                 | BDI               |
| Tolahunase 2018 |        |     |          |                     |               |                     |                                  |                |                             |                           |                      |                   |
| India           | Y      | 89  | 47.0     | 38 (9)              | N             | Severe              | Yoga                             | 12             | 2                           | 1500                      | Post                 | BDI-II            |
| India           | Y      | 89  | 48.0     | 40 (8)              | N             | Severe              | SSRI                             | NA             | NA                          | NA                        | Post                 | BDI-II            |

| Country         | Funded | n  | % Female | Mean Age (SD/Range) | Comorbidities | Baseline Depression | Treatment                     | Length (weeks) | Intensity prescribed (METs) | Exercise dose (METs/week) | Timepoints available     | Outcomes measured |
|-----------------|--------|----|----------|---------------------|---------------|---------------------|-------------------------------|----------------|-----------------------------|---------------------------|--------------------------|-------------------|
| Tsang 2006      |        |    |          |                     |               |                     |                               |                |                             |                           |                          |                   |
| China           | Y      | 34 | 97.0     | NA                  | Y             | Mild                | Educational                   | 16             | NA                          | NA                        | 1 week, 4 weeks, 8 weeks | GDS-15            |
| China           | Y      | 48 | 69.0     | NA                  | Y             | Mild                | Tai-chi / Qigong              | 16             | 2                           | 300                       | 1 week, 4 weeks, 8 weeks | GDS-15            |
| Uebelacker 2016 |        |    |          |                     |               |                     |                               |                |                             |                           |                          |                   |
| USA             | Y      | 8  | 62.0     | 28.4 (5.8)          | N             | Moderate            | Educational                   | 9              | NA                          | NA                        | Post                     | EPDS, QIDS-CR     |
| USA             | Y      | 12 | 42.0     | 28.4 (5.8)          | N             | Moderate            | Yoga                          | 9              | 2                           | 188                       | Post                     | EPDS, QIDS-CR     |
| Uebelacker 2017 |        |    |          |                     |               |                     |                               |                |                             |                           |                          |                   |
| USA             | Y      | 45 | 84.0     | 46.5 (12.16)        | N             | Moderate            | Yoga                          | 10             | 2                           | 400                       | Post, 12 weeks, 25 weeks | QIDS-CR           |
| USA             | Y      | 45 | 84.0     | 46.5 (12.16)        | N             | Moderate            | Mind-body + Education         | 10             | NA                          | NA                        | Post, 12 weeks, 25 weeks | QIDS-CR           |
| Veale 1992      |        |    |          |                     |               |                     |                               |                |                             |                           |                          |                   |
| UK              | Y      | 35 | 64.0     | 35.5 (NA)           | N             | Moderate            | Waitlist control              | 12             | NA                          | NA                        | Post                     | BDI               |
| UK              | Y      | 48 | 64.0     | 35.5 (NA)           | N             | Moderate            | Walking / Jogging             | 12             | 4                           | 810                       | Post                     | BDI               |
| UK              | Y      | 26 | 64.0     | 35.5 (NA)           | N             | Moderate            | Yoga                          | 12             | 2                           | 450                       | Post                     | BDI               |
| Verrusio 2014   |        |    |          |                     |               |                     |                               |                |                             |                           |                          |                   |
| Italy           | N      | 12 | 54.0     | 75.5 (7.4)          | Y             | Moderate            | Aerobic + Strength            | 24             | 2                           | 515                       | Post                     | GDS-15            |
| Italy           | N      | 12 | 54.0     | 75.5 (7.4)          | Y             | Moderate            | SSRI                          | 24             | NA                          | NA                        | Post                     | GDS-15            |
| Vickers 2009    |        |    |          |                     |               |                     |                               |                |                             |                           |                          |                   |
| USA             | Y      | 30 | 100.0    | 41.8 (12.1)         | N             | Mild                | Educational                   | 10             | NA                          | NA                        | Post, 14 weeks           | HRSD              |
| USA             | Y      | 30 | 100.0    | 40.9 (11.8)         | N             | Mild                | Physical activity counselling | 10             | 4                           | 600                       | Post, 14 weeks           | HRSD              |
| Vieira 2007     |        |    |          |                     |               |                     |                               |                |                             |                           |                          |                   |
| Brazil          | N      | 9  | 100.0    | 43.66 (NA)          | N             | Severe              | Usual care                    | 12             | NA                          | NA                        | Post, 24 weeks           | HAM-D             |



| Country         | Funded | n   | % Female | Mean Age (SD/Range) | Comorbidities | Baseline Depression | Treatment               | Length (weeks) | Intensity prescribed (METs) | Exercise dose (METs/week) | Timepoints available        | Outcomes measured |
|-----------------|--------|-----|----------|---------------------|---------------|---------------------|-------------------------|----------------|-----------------------------|---------------------------|-----------------------------|-------------------|
| Brazil          | N      | 9   | 100.0    | 43.66 (NA)          | N             | Severe              | Mixed aerobic exercises | 12             | 7                           | 700                       | Post, 24 weeks              | HAM-D             |
| Vollbehr 2022   |        |     |          |                     |               |                     |                         |                |                             |                           |                             |                   |
| The Netherlands | Y      | 83  | 100.0    | 24.9 (4.36)         | Y             | Severe              | Usual care              | NA             | NA                          | NA                        | 4 weeks, 17 weeks, 43 weeks | DASS, HDRS        |
| The Netherlands | Y      | 87  | 100.0    | 25.2 (4.9)          | Y             | Severe              | Yoga + psychoeducation  | 9              | 2                           | 225                       | 4 weeks, 17 weeks, 43 weeks | DASS, HDRS        |
| Wadden 2014     |        |     |          |                     |               |                     |                         |                |                             |                           |                             |                   |
| USA             | Y      | 452 | 60.0     | 58.7 (6.8)          | Y             | Mild                | Educational             | NA             | NA                          | NA                        | Post, 208 weeks             | BDI               |
| USA             | Y      | 480 | 60.0     | 58.7 (6.8)          | Y             | Mild                | Mixed aerobic exercises | 208            | 4                           | 387                       | Post, 208 weeks             | BDI               |
| Walter 2023     |        |     |          |                     |               |                     |                         |                |                             |                           |                             |                   |
| USA             | Y      | 48  | 46.0     | 29.3 (6.2)          | N             | Moderate            | Surfing                 | 6              | 3                           | 3780                      | Post, 6 weeks               | MADRS, PHQ-9      |
| USA             | Y      | 48  | 58.0     | 27 (4.8)            | N             | Moderate            | Walking / Jogging       | 6              | 6                           | 7560                      | Post, 6 weeks               | MADRS, PHQ-9      |
| Weinstock 2016  |        |     |          |                     |               |                     |                         |                |                             |                           |                             |                   |
| USA             | Y      | 5   | 100.0    | NA                  | N             | Moderate            | Educational             | 10             | NA                          | NA                        | Post                        | QIDS-CR           |
| USA             | Y      | 9   | 56.0     | NA                  | N             | Moderate            | Yoga                    | 10             | 2                           | 400                       | Post                        | QIDS-CR           |
| Whiddon 2013    |        |     |          |                     |               |                     |                         |                |                             |                           |                             |                   |
| USA             | N      | 14  | 82.0     | NA                  | N             | Severe              | Waitlist control        | 8              | NA                          | NA                        | Post                        | BDI-II            |
| USA             | N      | 12  | 96.0     | NA                  | N             | Severe              | Yoga                    | 8              | 2                           | 675                       | Post                        | BDI-II            |
| Williams 2008   |        |     |          |                     |               |                     |                         |                |                             |                           |                             |                   |
| USA             | Y      | 12  | 89.0     | 87.9 (5.95)         | N             | Moderate            | Social                  | 16             | NA                          | NA                        | Post                        | CSDD              |
| USA             | Y      | 16  | 89.0     | 87.9 (5.95)         | N             | Moderate            | Aerobic + Strength      | 16             | 5                           | 692                       | Post                        | CSDD              |
| USA             | Y      | 17  | 89.0     | 87.9 (5.95)         | N             | Moderate            | Walking / Jogging       | 16             | 4                           | 645                       | Post                        | CSDD              |
| Woolery 2004    |        |     |          |                     |               |                     |                         |                |                             |                           |                             |                   |
| USA             | Y      | 13  | 79.0     | 21.5 (3.23)         | N             | Mild                | Waitlist control        | NA             | NA                          | NA                        | Post                        | BDI               |
| USA             | Y      | 10  | 79.0     | 21.5 (3.23)         | N             | Mild                | Yoga                    | 5              | 2                           | 300                       | Post                        | BDI               |

| Country     | Funded | n  | % Female | Mean Age (SD/Range) | Comorbidities | Baseline Depression | Treatment               | Length (weeks) | Intensity prescribed (METs) | Exercise dose (METs/week) | Timepoints available    | Outcomes measured |
|-------------|--------|----|----------|---------------------|---------------|---------------------|-------------------------|----------------|-----------------------------|---------------------------|-------------------------|-------------------|
| Wunram 2018 |        |    |          |                     |               |                     |                         |                |                             |                           |                         |                   |
| Germany     | Y      | 22 | 70.0     | 15.9 (1.1)          | N             | Moderate            | Usual care              | 6              | NA                          | NA                        | Post, 8 weeks, 20 weeks | DIKJ              |
| Germany     | Y      | 20 | 77.0     | 15.9 (1.1)          | N             | Moderate            | Cycling                 | 6              | 5                           | 648                       | Post, 8 weeks, 20 weeks | DIKJ              |
| Germany     | Y      | 21 | 73.0     | 15.9 (1.1)          | N             | Moderate            | Whole body vibration    | 6              | 4                           | NA                        | Post, 8 weeks, 20 weeks | DIKJ              |
| Yagli 2015  |        |    |          |                     |               |                     |                         |                |                             |                           |                         |                   |
| Turkey      | N      | 10 | 100.0    | NA                  | N             | Moderate            | Aerobic + Strength      | 8              | 5                           | 534                       | Post                    | BDI               |
| Turkey      | N      | 10 | 100.0    | NA                  | N             | Moderate            | Yoga                    | 8              | 2                           | 300                       | Post                    | BDI               |
| Yang 2021   |        |    |          |                     |               |                     |                         |                |                             |                           |                         |                   |
| China       | Y      | 40 | 42.0     | NA                  | Y             | Mild                | Usual care              | NA             | NA                          | NA                        | Post                    | SDS               |
| China       | Y      | 40 | 40.0     | NA                  | Y             | Mild                | Tai-chi / Qigong        | 4              | 2                           | 188                       | Post                    | SDS               |
| Yeung 2012  |        |    |          |                     |               |                     |                         |                |                             |                           |                         |                   |
| USA         | Y      | 13 | NA       | 55 (10)             | N             | Mild                | Waitlist control        | 12             | NA                          | NA                        | Post                    | HAM-D             |
| USA         | Y      | 26 | 58.0     | 55 (10)             | N             | Moderate            | Tai-chi / Qigong        | 12             | 2                           | 300                       | Post                    | HAM-D             |
| Yeung 2017  |        |    |          |                     |               |                     |                         |                |                             |                           |                         |                   |
| USA         | Y      | 22 | 36.0     | 54 (13)             | N             | Moderate            | Educational             | 12             | NA                          | NA                        | Post                    | BDI, HAM-D        |
| USA         | Y      | 22 | 36.0     | 54 (13)             | N             | Moderate            | Waitlist control        | NA             | NA                          | NA                        | Post                    | BDI, HAM-D        |
| USA         | Y      | 23 | 35.0     | 54 (13)             | N             | Moderate            | Tai-chi / Qigong        | 12             | 2                           | 300                       | Post                    | BDI, HAM-D        |
| Zeibig 2021 |        |    |          |                     |               |                     |                         |                |                             |                           |                         |                   |
| Germany     | Y      | 36 | 75.0     | 34.33 (12.39)       | Y             | Unclear             | Waitlist control        | NA             | NA                          | NA                        | Post, 40 weeks          | SCL-90-R          |
| Germany     | Y      | 36 | 69.0     | 37.33 (14.23)       | Y             | Unclear             | Mixed aerobic exercises | 12             | 8                           | 619                       | Post, 40 weeks          | SCL-90-R          |
| Zhao 2023   |        |    |          |                     |               |                     |                         |                |                             |                           |                         |                   |

| Country  | Funded | n  | % Female | Mean Age (SD/Range) | Comorbidities | Baseline Depression | Treatment               | Length (weeks) | Intensity prescribed (METs) | Exercise dose (METs/week) | Timepoints available | Outcomes measured    |
|----------|--------|----|----------|---------------------|---------------|---------------------|-------------------------|----------------|-----------------------------|---------------------------|----------------------|----------------------|
| China    | Y      | 28 | 71.0     | 21.21 (2.25)        | N             | Moderate            | Waitlist control        | NA             | NA                          | NA                        | Post, 4 weeks        | SDS                  |
| China    | Y      | 29 | 72.0     | 20.72 (2.05)        | N             | Moderate            | Mixed aerobic exercises | 12             | 7                           | 840                       | Post, 4 weeks        | SDS                  |
| China    | Y      | 29 | 69.0     | 21.66 (1.97)        | N             | Moderate            | Strength                | 12             | 5                           | 600                       | Post, 4 weeks        | SDS                  |
| Zou 2005 |        |    |          |                     |               |                     |                         |                |                             |                           |                      |                      |
| China    | N      | 31 | NA       | (65-80)             | N             | Severe              | Yoga                    | 8              | 4                           | 1670                      | Post, 24 weeks       | BDI, HAM-D, SCL-90-R |
| China    | N      | 30 | NA       | (65-80)             | N             | Severe              | SSRI                    | 8              | NA                          | NA                        | Post, 24 weeks       | BDI, HAM-D, SCL-90-R |

#### **S4 Characteristics of treatments meeting participant threshold**

| Treatment                     | k   | n     | Countries                                                                                                                                                                                                                                                                               | Percent of studies with         |                              |                          |                              |                            | Mean (SD)     |                |                  |                      |
|-------------------------------|-----|-------|-----------------------------------------------------------------------------------------------------------------------------------------------------------------------------------------------------------------------------------------------------------------------------------------|---------------------------------|------------------------------|--------------------------|------------------------------|----------------------------|---------------|----------------|------------------|----------------------|
|                               |     |       |                                                                                                                                                                                                                                                                                         | Participants with comorbidities | Group exercise prescriptions | Mild baseline depression | Moderate baseline depression | Severe baseline depression | Age           | Percent Female | Intensity (METs) | Duration (mins/week) |
| Active control                | 114 | 3,593 | Australia, Brazil, Canada, China, Colombia, Croatia, Denmark, Finland, France, Germany, Hong Kong, India, Iran, Israel, Italy, Japan, Malaysia, New Zealand, Nigeria, Norway, Portugal, Saudi Arabia, South Korea, Spain, Sweden, Switzerland, Taiwan, The Netherlands, Turkey, UK, USA | 28.07                           | NA                           | 32                       | 44                           | 24                         | 44.75 (17.78) | 72.72 (22.54)  | NA               | NA                   |
| Aerobic + Strength            | 28  | 1,036 | Australia, Brazil, Canada, China, Germany, Greece, Italy, South Korea, Sweden, Taiwan, The Netherlands, Turkey, UK, USA                                                                                                                                                                 | 25.00                           | 64.29                        | 36                       | 46                           | 18                         | 49.78 (19.6)  | 68.64 (21.94)  | 4.71 (1.63)      | 137.53 (60.84)       |
| Aerobic + Therapy             | 15  | 404   | China, Finland, Germany, Iran, South Korea, Sweden, UK, USA                                                                                                                                                                                                                             | 20.00                           | NA                           | 27                       | 67                           | 7                          | 46.12 (16.34) | 68.96 (21.04)  | NA               | 145 (38.73)          |
| Cognitive behavioural therapy | 20  | 712   | Germany, Iran, Sweden, Taiwan, UK, USA                                                                                                                                                                                                                                                  | 30.00                           | NA                           | 15                       | 65                           | 10                         | 47.02 (16.46) | 66.06 (19.75)  | NA               | NA                   |

| Treatment                     | k  | n     | Countries                                                                                                                                                  | Percent of studies with         |                              |                          |                              |                            | Mean (SD)        |                  |                  |                      |
|-------------------------------|----|-------|------------------------------------------------------------------------------------------------------------------------------------------------------------|---------------------------------|------------------------------|--------------------------|------------------------------|----------------------------|------------------|------------------|------------------|----------------------|
|                               |    |       |                                                                                                                                                            | Participants with comorbidities | Group exercise prescriptions | Mild baseline depression | Moderate baseline depression | Severe baseline depression | Age              | Percent Female   | Intensity (METs) | Duration (mins/week) |
| Cycling                       | 11 | 243   | Denmark, Germany, Switzerland, USA                                                                                                                         | 9.09                            | 72.73                        | 27                       | 18                           | 55                         | 26.4<br>(11.52)  | 53.18<br>(31.58) | 5.57<br>(1.44)   | 138.27<br>(35.26)    |
| Dance                         | 5  | 107   | China, Iran, South Korea, USA                                                                                                                              | 20.00                           | 80.00                        | 20                       | 40                           | 20                         | 30.83<br>(19.19) | 88.02<br>(16.71) | 5.88<br>(1.72)   | 155.97<br>(136.02)   |
| Exercise + SSRI               | 11 | 268   | Brazil, China, Denmark, Iran, Italy, Portugal, USA                                                                                                         | 27.27                           | NA                           | 9                        | 45                           | 45                         | 57.67<br>(14.63) | 70.25<br>(21.79) | NA               | 222.84<br>(155.88)   |
| Mixed aerobic exercises       | 49 | 1,253 | Australia, Brazil, Canada, China, Colombia, Denmark, France, Germany, India, Iran, Italy, New Zealand, Norway, Spain, Sweden, Switzerland, Turkey, UK, USA | 18.37                           | 63.27                        | 18                       | 55                           | 24                         | 36.65<br>(11.77) | 75.25<br>(24.27) | 5.68<br>(1.5)    | 139.11<br>(50.88)    |
| Physical activity counselling | 4  | 256   | Switzerland, UK, USA                                                                                                                                       | 50.00                           | 0.00                         | 25                       | 50                           | 25                         | 41.19<br>(0.51)  | 78.44<br>(20.05) | 4 (0)            | 150 (0)              |
| Relaxation                    | 6  | 234   | China, Denmark, Germany, USA                                                                                                                               | 16.67                           | NA                           | 50                       | 0                            | 50                         | 38.91<br>(16.08) | 78.12<br>(20.28) | NA               | NA                   |
| SSRI                          | 16 | 432   | Brazil, China, France, India, Iran, Italy, Portugal, USA                                                                                                   | 31.25                           | NA                           | 25                       | 31                           | 44                         | 58.1<br>(14.19)  | 68.8<br>(19.13)  | NA               | NA                   |
| Strength                      | 21 | 625   | Australia, Brazil, China, Denmark, Germany, India, Japan, Norway, UK, USA                                                                                  | 38.10                           | 61.90                        | 24                       | 52                           | 24                         | 50.66<br>(21.28) | 58.96<br>(24.85) | 3.68<br>(0.96)   | 147.5<br>(54.15)     |

| Treatment         | k  | n     | Countries                                                                                                                            | Percent of studies with         |                              |                          |                              |                            | Mean (SD)        |                  |                  |                      |
|-------------------|----|-------|--------------------------------------------------------------------------------------------------------------------------------------|---------------------------------|------------------------------|--------------------------|------------------------------|----------------------------|------------------|------------------|------------------|----------------------|
|                   |    |       |                                                                                                                                      | Participants with comorbidities | Group exercise prescriptions | Mild baseline depression | Moderate baseline depression | Severe baseline depression | Age              | Percent Female   | Intensity (METs) | Duration (mins/week) |
| Tai-chi / Qigong  | 12 | 343   | China, Germany, Malaysia, Taiwan, USA                                                                                                | 50.00                           | 83.33                        | 33                       | 50                           | 17                         | 59.43<br>(18.1)  | 59.64<br>(18.15) | 2.6<br>(0.35)    | 150.02<br>(92.02)    |
| Waitlist control  | 53 | 1,303 | Australia, Brazil, Canada, China, France, Germany, Greece, India, Iran, South Korea, Sweden, Taiwan, Thailand, Turkey, UK, USA       | 18.87                           | NA                           | 30                       | 45                           | 19                         | 40.6<br>(16.99)  | 76.46<br>(24.45) | NA               | NA                   |
| Walking / Jogging | 50 | 1,200 | Australia, China, France, Germany, Hong Kong, Iran, Israel, Japan, Nigeria, Norway, Portugal, Saudi Arabia, The Netherlands, UK, USA | 14.00                           | 44.00                        | 28                       | 58                           | 12                         | 44.08<br>(16.99) | 75.44<br>(25.69) | 4.57<br>(0.82)   | 156.2<br>(177.86)    |
| Yoga              | 33 | 1,047 | Australia, Canada, China, Croatia, Germany, India, Sweden, Taiwan, Turkey, UK, USA                                                   | 27.27                           | 90.91                        | 27                       | 52                           | 18                         | 38.55<br>(12.51) | 76.55<br>(22.07) | 2.71<br>(0.59)   | 202.61<br>(169.84)   |

## **S5 Risk of bias ratings for individual studies**



| Author, Year        | Sequence generation | Allocation concealment | Blinding participants | Blinding personnel | Blinding outcome assessment | Incomplete outcome | Selective reporting | Other bias | Overall bias |
|---------------------|---------------------|------------------------|-----------------------|--------------------|-----------------------------|--------------------|---------------------|------------|--------------|
| Abdelbasset 2019    | Low                 | Unclear                | Unclear               | Unclear            | Low                         | Low                | Unclear             | High       | High         |
| Abdelbasset 2020    | Low                 | Low                    | Unclear               | Unclear            | Low                         | Low                | Unclear             | Low        | Unclear      |
| Abdollahi 2017      | Unclear             | Unclear                | Unclear               | Unclear            | Unclear                     | Low                | Unclear             | Unclear    | Unclear      |
| Abedi 2015          | High                | High                   | High                  | High               | Unclear                     | Low                | Low                 | Low        | High         |
| Abt 2006            | Unclear             | Low                    | Low                   | High               | Low                         | Unclear            | Unclear             | Low        | High         |
| Aguinaga 2018       | Low                 | Low                    | Unclear               | Unclear            | Unclear                     | Unclear            | Low                 | Low        | Unclear      |
| Armstrong 2003      | Low                 | Low                    | High                  | High               | High                        | Unclear            | Unclear             | Low        | High         |
| Armstrong 2004      | Low                 | Low                    | High                  | High               | High                        | Low                | Unclear             | High       | High         |
| Balchin 2016        | Unclear             | Unclear                | High                  | Unclear            | Low                         | High               | Unclear             | Unclear    | High         |
| Beffert 1994        | Unclear             | Unclear                | High                  | Unclear            | Unclear                     | Low                | Unclear             | Low        | High         |
| BelvederiMurri 2015 | Low                 | Low                    | High                  | High               | Low                         | Unclear            | Unclear             | Low        | High         |
| Bhandari 2022       | Low                 | Unclear                | Unclear               | Unclear            | Unclear                     | Low                | Low                 | Low        | Unclear      |
| Bieber 2021         | Low                 | Unclear                | Unclear               | Low                | Low                         | Unclear            | Unclear             | Low        | Unclear      |
| Blumenthal 1999     | Unclear             | Low                    | Unclear               | Unclear            | Low                         | Low                | Low                 | Low        | Unclear      |
| Blumenthal 2007     | Low                 | Low                    | High                  | High               | Low                         | Low                | Low                 | Low        | High         |
| Blumenthal 2012     | Low                 | Low                    | Unclear               | Low                | Low                         | Low                | High                | Low        | High         |
| Bombardier 2013     | Low                 | Low                    | High                  | High               | Low                         | Low                | Unclear             | Low        | High         |
| Bonnet 2006         | Unclear             | Unclear                | Unclear               | High               | High                        | High               | Unclear             | Low        | High         |
| Bosscher 1993       | Unclear             | Unclear                | High                  | High               | High                        | High               | Unclear             | Low        | High         |
| Brenes 2007         | Low                 | Unclear                | Unclear               | Unclear            | Low                         | Unclear            | Unclear             | Low        | Unclear      |
| Bressington 2019    | Low                 | Low                    | Unclear               | Unclear            | Unclear                     | Low                | Low                 | Low        | Unclear      |
| Briggs 2017         | Low                 | Low                    | Unclear               | Low                | Low                         | Low                | Low                 | Low        | Unclear      |
| Brown 1992          | Unclear             | Unclear                | Unclear               | Unclear            | Unclear                     | High               | Unclear             | High       | High         |
| Brush 2022          | Low                 | Low                    | Unclear               | Unclear            | Unclear                     | Low                | Unclear             | Low        | Unclear      |
| Buschert 2018       | Unclear             | Unclear                | Unclear               | Unclear            | Unclear                     | High               | Unclear             | Low        | High         |
| Butler 2008         | High                | High                   | High                  | High               | Low                         | Unclear            | Unclear             | Low        | High         |
| Buttner 2015        | Low                 | Low                    | Unclear               | Unclear            | Low                         | Low                | Low                 | High       | High         |

| Author, Year          | Sequence generation | Allocation concealment | Blinding participants | Blinding personnel | Blinding outcome assessment | Incomplete outcome | Selective reporting | Other bias | Overall bias |
|-----------------------|---------------------|------------------------|-----------------------|--------------------|-----------------------------|--------------------|---------------------|------------|--------------|
| Callaghan 2011        | Low                 | Low                    | Unclear               | High               | High                        | Low                | Low                 | Low        | High         |
| Carneiro 2015         | Low                 | Low                    | High                  | High               | High                        | High               | Low                 | Low        | High         |
| Carter 2015           | Low                 | Low                    | High                  | High               | Low                         | Low                | Low                 | Low        | High         |
| Cecchini-Estrada 2015 | Unclear             | Unclear                | Low                   | Unclear            | Unclear                     | Unclear            | Unclear             | Low        | Unclear      |
| Chalder 2012          | Low                 | Low                    | High                  | High               | High                        | Low                | Low                 | Low        | High         |
| Chan 2012             | Unclear             | Low                    | Unclear               | Low                | Low                         | High               | Low                 | Low        | High         |
| Chang 2018            | Low                 | Unclear                | Unclear               | Unclear            | Low                         | Low                | High                | Low        | High         |
| Cheng 2012            | Unclear             | Unclear                | High                  | High               | Unclear                     | Low                | Low                 | Low        | High         |
| Cheng 2016            | Unclear             | Unclear                | Unclear               | Unclear            | Unclear                     | Unclear            | Unclear             | Unclear    | Unclear      |
| Cheung 2018           | Unclear             | Low                    | High                  | High               | Low                         | Low                | Low                 | Low        | High         |
| Chin 2022             | Low                 | Low                    | Unclear               | Unclear            | Low                         | High               | Unclear             | Low        | High         |
| Chou 2004             | Unclear             | Unclear                | High                  | Unclear            | Low                         | Low                | Unclear             | Low        | High         |
| Chu 2009              | Low                 | Unclear                | Unclear               | High               | High                        | High               | Unclear             | Low        | High         |
| Chu 2017              | Low                 | Unclear                | High                  | Low                | Low                         | Low                | Low                 | Low        | High         |
| Chu 2018              | Unclear             | Unclear                | High                  | High               | High                        | High               | Low                 | Low        | High         |
| Ciccolo 2022          | Low                 | Low                    | High                  | High               | Low                         | Low                | Low                 | Low        | High         |
| Cody 2023             | Low                 | Low                    | Low                   | High               | High                        | High               | Low                 | Low        | High         |
| Cohen-Kahn 1995       | Unclear             | Unclear                | Unclear               | Unclear            | High                        | High               | Unclear             | Low        | High         |
| Cooney 2018           | High                | High                   | High                  | High               | Unclear                     | Low                | Low                 | Low        | High         |
| Craft 2007            | Unclear             | Unclear                | Unclear               | Low                | Unclear                     | Low                | Low                 | Low        | Unclear      |
| D'Amato 1990          | Unclear             | Unclear                | Unclear               | Unclear            | Unclear                     | Low                | Unclear             | Low        | Unclear      |
| Da Costa 2009         | Low                 | Low                    | High                  | Unclear            | Low                         | Unclear            | Unclear             | High       | High         |
| Daley 2008            | Low                 | Low                    | Unclear               | High               | Unclear                     | Low                | Unclear             | Low        | High         |
| Daley 2015            | Low                 | Low                    | High                  | High               | High                        | Low                | Unclear             | High       | High         |
| DanHauer 2022         | Low                 | Unclear                | High                  | Unclear            | Unclear                     | Low                | Low                 | Low        | High         |
| Danielsson 2014       | Unclear             | Low                    | Low                   | Low                | Low                         | Low                | Unclear             | Low        | Unclear      |
| Davis 2014            | Low                 | Low                    | High                  | Unclear            | High                        | Low                | Unclear             | Low        | High         |
| de Groot 2019         | Low                 | Low                    | Unclear               | Unclear            | Low                         | High               | Low                 | Low        | High         |

| Author, Year     | Sequence generation | Allocation concealment | Blinding participants | Blinding personnel | Blinding outcome assessment | Incomplete outcome | Selective reporting | Other bias | Overall bias |
|------------------|---------------------|------------------------|-----------------------|--------------------|-----------------------------|--------------------|---------------------|------------|--------------|
| de Manincor 2016 | Low                 | Low                    | Low                   | Low                | Low                         | Low                | Low                 | Low        | Low          |
| Deus 2021        | Low                 | Unclear                | Unclear               | Unclear            | Unclear                     | Unclear            | Unclear             | Unclear    | Unclear      |
| Dopp 2018        | Unclear             | Unclear                | Unclear               | Unclear            | Unclear                     | Unclear            | Unclear             | Low        | Unclear      |
| Doyne 1987       | Unclear             | High                   | High                  | Unclear            | High                        | High               | Unclear             | Low        | High         |
| Dunn 2002        | Low                 | Low                    | High                  | Unclear            | Low                         | High               | Low                 | Low        | High         |
| Epstein 1986     | Unclear             | Unclear                | Unclear               | Unclear            | Unclear                     | Unclear            | Unclear             | Low        | Unclear      |
| Euteneuer 2017   | Low                 | Low                    | Low                   | Low                | Low                         | Low                | Unclear             | Low        | Unclear      |
| Fetsch 1980      | Low                 | High                   | High                  | High               | High                        | High               | Unclear             | Low        | High         |
| Field 2012       | Unclear             | Unclear                | Unclear               | Unclear            | Low                         | High               | Unclear             | Low        | High         |
| Field 2013       | Low                 | Unclear                | Unclear               | Unclear            | Low                         | Unclear            | Unclear             | Low        | Unclear      |
| Foley 2008       | Unclear             | Unclear                | High                  | Unclear            | High                        | High               | Unclear             | Unclear    | High         |
| Forsyth 2017     | Low                 | Low                    | Unclear               | Unclear            | Low                         | Low                | Unclear             | Low        | Unclear      |
| Fremont 1987     | Unclear             | Unclear                | High                  | High               | High                        | High               | Unclear             | Low        | High         |
| Gao 2016         | Unclear             | Unclear                | Unclear               | Unclear            | Unclear                     | Low                | Low                 | Low        | Unclear      |
| García-Toro 2012 | High                | Low                    | Unclear               | Unclear            | High                        | Unclear            | Low                 | High       | High         |
| Gary 2010        | Unclear             | Unclear                | Unclear               | High               | Low                         | Low                | Unclear             | Low        | High         |
| Gautam 2019      | Low                 | Low                    | Unclear               | Low                | Unclear                     | Low                | Unclear             | Low        | Unclear      |
| Goracci 2016     | Unclear             | Unclear                | Unclear               | Unclear            | Unclear                     | Low                | Low                 | Low        | Unclear      |
| Greer 2015       | Unclear             | Unclear                | Unclear               | Unclear            | Low                         | Low                | Low                 | Low        | Unclear      |
| Gujral 2019      | Unclear             | Unclear                | Unclear               | Unclear            | Low                         | High               | Unclear             | Low        | High         |
| Guo 2020         | Low                 | Low                    | Unclear               | Unclear            | Unclear                     | Low                | Low                 | Low        | Unclear      |
| Hallgren 2015    | Low                 | Low                    | High                  | Unclear            | Low                         | High               | Low                 | High       | High         |
| Hanssen 2018     | Low                 | Unclear                | Unclear               | Unclear            | Unclear                     | High               | Unclear             | High       | High         |
| Hausleiter 2020  | Unclear             | Unclear                | Unclear               | Unclear            | High                        | Low                | Unclear             | Low        | High         |
| Heh 2008         | High                | High                   | Unclear               | Unclear            | Low                         | Low                | Unclear             | Low        | High         |
| Heinzel 2022     | Low                 | Low                    | Low                   | High               | Unclear                     | Low                | Low                 | Low        | High         |
| Heissel 2015     | Unclear             | Unclear                | High                  | Unclear            | Unclear                     | Low                | Unclear             | Unclear    | High         |
| Hemat-Far 2012   | Unclear             | Unclear                | Unclear               | Unclear            | High                        | Unclear            | Low                 | High       | High         |

| Author, Year      | Sequence generation | Allocation concealment | Blinding participants | Blinding personnel | Blinding outcome assessment | Incomplete outcome | Selective reporting | Other bias | Overall bias |
|-------------------|---------------------|------------------------|-----------------------|--------------------|-----------------------------|--------------------|---------------------|------------|--------------|
| Hess-Homeier 1981 | Unclear             | High                   | High                  | High               | High                        | High               | Unclear             | Low        | High         |
| Ho 2014           | Low                 | Low                    | High                  | High               | Low                         | Low                | Unclear             | High       | High         |
| Hoffman 2010      | Low                 | Low                    | Unclear               | Unclear            | High                        | Low                | Unclear             | Low        | High         |
| Huang 2015        | Low                 | Low                    | Unclear               | Unclear            | Low                         | Low                | Unclear             | Low        | Unclear      |
| Hughes 2013       | Low                 | Low                    | Unclear               | Unclear            | Low                         | High               | Low                 | Low        | High         |
| Imboden 2020      | Low                 | Low                    | Low                   | Low                | Low                         | Unclear            | Unclear             | Low        | Unclear      |
| Irandoost 2019    | Unclear             | Unclear                | Unclear               | Unclear            | Unclear                     | Low                | Unclear             | High       | High         |
| Jelalian 2019     | Low                 | Low                    | Unclear               | Unclear            | Unclear                     | High               | High                | Unclear    | High         |
| Jeong 2005        | Unclear             | Unclear                | Unclear               | Unclear            | Unclear                     | Low                | Unclear             | Low        | Unclear      |
| Jin 2019          | Unclear             | Unclear                | Unclear               | Unclear            | High                        | Unclear            | Unclear             | Low        | High         |
| Jing 2022         | Unclear             | Unclear                | Unclear               | Unclear            | Unclear                     | High               | Low                 | Low        | High         |
| Joyce 2021        | Low                 | Low                    | High                  | High               | High                        | Low                | Low                 | Low        | High         |
| Kanner 1991       | Unclear             | Unclear                | Low                   | Unclear            | High                        | High               | Unclear             | Low        | High         |
| Kerling 2015      | Unclear             | Unclear                | Unclear               | Unclear            | Unclear                     | Low                | Unclear             | Unclear    | Unclear      |
| Khoshnab 2017     | Unclear             | High                   | High                  | Unclear            | High                        | Unclear            | Unclear             | High       | High         |
| Kim 2022          | Low                 | Low                    | High                  | Unclear            | Low                         | Low                | Unclear             | Low        | High         |
| Klein 1984        | Unclear             | High                   | Unclear               | Unclear            | High                        | High               | Unclear             | Unclear    | High         |
| Knubben 2007      | Low                 | Low                    | Unclear               | Unclear            | Low                         | Unclear            | Unclear             | Low        | Unclear      |
| Kouidi 2010       | Unclear             | Unclear                | Unclear               | Unclear            | High                        | Low                | Unclear             | Low        | High         |
| Krogh 2009        | Low                 | Low                    | Unclear               | Unclear            | Low                         | Low                | Low                 | Low        | Unclear      |
| Krogh 2012        | Low                 | Low                    | High                  | High               | Low                         | Unclear            | Unclear             | High       | High         |
| Kruisdijk 2019    | Low                 | Low                    | High                  | Unclear            | Low                         | Unclear            | Unclear             | High       | High         |
| Kuvačić 2018      | Unclear             | Unclear                | Unclear               | Unclear            | Unclear                     | Low                | Unclear             | Low        | Unclear      |
| Lanza 2018        | Low                 | Low                    | High                  | Unclear            | High                        | Low                | Unclear             | Low        | High         |
| LaRocque 2021     | Low                 | Low                    | High                  | Unclear            | Low                         | Low                | Low                 | Low        | High         |
| Lavretsky 2011    | Low                 | Low                    | High                  | Unclear            | Low                         | Low                | Unclear             | Low        | High         |
| Lavretsky 2022    | Low                 | Unclear                | Low                   | Low                | Low                         | Low                | Low                 | Low        | Unclear      |
| Lee 2020          | Low                 | Low                    | Unclear               | Unclear            | Unclear                     | Low                | Unclear             | Low        | Unclear      |

| Author, Year             | Sequence generation | Allocation concealment | Blinding participants | Blinding personnel | Blinding outcome assessment | Incomplete outcome | Selective reporting | Other bias | Overall bias |
|--------------------------|---------------------|------------------------|-----------------------|--------------------|-----------------------------|--------------------|---------------------|------------|--------------|
| Legrand 2007             | Unclear             | Unclear                | High                  | Unclear            | High                        | Low                | Unclear             | Low        | High         |
| Legrand 2009             | Unclear             | Unclear                | Unclear               | High               | High                        | High               | Unclear             | Low        | High         |
| Legrand 2014             | Low                 | Low                    | High                  | Unclear            | Unclear                     | High               | Unclear             | Low        | High         |
| Legrand 2016             | Low                 | Unclear                | High                  | High               | High                        | Low                | Low                 | Low        | High         |
| Levin 2016               | Unclear             | Unclear                | Unclear               | Unclear            | Unclear                     | Unclear            | Unclear             | Unclear    | Unclear      |
| Liao 2018                | Low                 | Low                    | High                  | Unclear            | High                        | Low                | Low                 | Low        | High         |
| Lok 2017                 | Low                 | Low                    | Low                   | High               | High                        | Low                | Unclear             | Low        | High         |
| Lu 2022                  | Low                 | High                   | Unclear               | Unclear            | Unclear                     | Unclear            | Unclear             | Unclear    | High         |
| Luttenberger 2015        | Low                 | High                   | Unclear               | Unclear            | Unclear                     | Low                | Low                 | Low        | High         |
| Ma 2019                  | Low                 | Low                    | Unclear               | Low                | Low                         | High               | Low                 | Low        | High         |
| Maddux 2018              | Unclear             | Low                    | High                  | Low                | Unclear                     | Low                | Unclear             | Low        | High         |
| Maharaj 2023             | Low                 | Unclear                | High                  | High               | Low                         | Low                | Unclear             | Low        | High         |
| Makizako 2020            | Low                 | Unclear                | Unclear               | Unclear            | Unclear                     | Unclear            | Low                 | Low        | Unclear      |
| Margolis 1982            | Unclear             | High                   | High                  | Unclear            | High                        | Low                | Unclear             | Low        | High         |
| Martinsen 1985           | Unclear             | Unclear                | High                  | High               | High                        | Unclear            | Unclear             | Low        | High         |
| Martinsen 1989           | Unclear             | Unclear                | Unclear               | Unclear            | Low                         | Low                | Unclear             | Low        | Unclear      |
| Martiny 2012             | Low                 | Low                    | High                  | Low                | Low                         | Low                | Low                 | High       | High         |
| McCann 1984              | Unclear             | Unclear                | Unclear               | Unclear            | High                        | High               | Unclear             | Low        | High         |
| McMurdo 2001             | Low                 | Low                    | Unclear               | Unclear            | Low                         | Low                | Unclear             | Low        | Unclear      |
| Meleppurakkal 2021       | Unclear             | Unclear                | Unclear               | Unclear            | Unclear                     | Unclear            | Unclear             | Low        | Unclear      |
| Meyer 2022               | Low                 | Low                    | High                  | Unclear            | Low                         | Low                | Unclear             | High       | High         |
| Minghetti 2018           | Unclear             | Unclear                | Low                   | Unclear            | High                        | Low                | Unclear             | Low        | High         |
| Mitchell 2012            | Unclear             | Unclear                | Unclear               | Unclear            | Unclear                     | Low                | Unclear             | Unclear    | Unclear      |
| Mitchell 2014            | Low                 | High                   | High                  | High               | Unclear                     | Low                | Low                 | Low        | High         |
| Moncrieft 2016           | Low                 | Unclear                | High                  | Unclear            | High                        | High               | Unclear             | Unclear    | High         |
| Moraes 2020              | Unclear             | Unclear                | Unclear               | Unclear            | Unclear                     | Low                | Low                 | Low        | Unclear      |
| Mosquera-Valderrama 2012 | Unclear             | Unclear                | Unclear               | Unclear            | Unclear                     | Low                | Unclear             | Low        | Unclear      |

| Author, Year      | Sequence generation | Allocation concealment | Blinding participants | Blinding personnel | Blinding outcome assessment | Incomplete outcome | Selective reporting | Other bias | Overall bias |
|-------------------|---------------------|------------------------|-----------------------|--------------------|-----------------------------|--------------------|---------------------|------------|--------------|
| Mota-Pereira 2011 | Unclear             | Unclear                | Unclear               | High               | Low                         | Low                | Low                 | High       | High         |
| Motl 2020         | Low                 | Low                    | Unclear               | Unclear            | Unclear                     | Unclear            | Unclear             | Low        | Unclear      |
| Mutrie 1986       | Low                 | Unclear                | Low                   | High               | Unclear                     | High               | Unclear             | Low        | High         |
| Nabkasorn 2006    | Unclear             | Unclear                | Unclear               | Unclear            | High                        | High               | Unclear             | Low        | High         |
| Nasstasia 2019    | Low                 | Low                    | Unclear               | Low                | Low                         | Unclear            | Low                 | Low        | Unclear      |
| Naumann 2020      | Low                 | Low                    | Unclear               | Unclear            | High                        | High               | Low                 | Low        | High         |
| Newcombe 2023     | Low                 | Unclear                | High                  | Unclear            | High                        | Low                | Unclear             | Low        | High         |
| Norouzi 2020      | Unclear             | Unclear                | Unclear               | Unclear            | Unclear                     | Low                | Unclear             | Low        | Unclear      |
| Norouzi 2023      | Low                 | Low                    | Low                   | High               | High                        | Low                | High                | Low        | High         |
| Nyström 2017      | Low                 | Low                    | Unclear               | High               | High                        | Low                | Low                 | Low        | High         |
| Olson 2017        | Low                 | Low                    | Unclear               | Unclear            | High                        | Low                | Unclear             | Low        | High         |
| Oretzky 2007      | Unclear             | High                   | High                  | High               | High                        | Low                | Unclear             | Low        | High         |
| Ouyang 2001       | Unclear             | Unclear                | Unclear               | Unclear            | Unclear                     | Unclear            | Unclear             | Low        | Unclear      |
| Ozkan 2020        | Low                 | Unclear                | Unclear               | Unclear            | Unclear                     | High               | Low                 | Unclear    | High         |
| Pagoto 2013       | Low                 | Low                    | Unclear               | Unclear            | Low                         | Low                | Low                 | Unclear    | Unclear      |
| Passmore 2006     | Unclear             | Unclear                | High                  | High               | High                        | Low                | Unclear             | Unclear    | High         |
| Patten 2017       | Unclear             | Low                    | High                  | High               | High                        | Low                | Low                 | Low        | High         |
| Patten 2018       | Unclear             | Unclear                | Unclear               | Unclear            | High                        | High               | Unclear             | Low        | High         |
| Pentecost 2015    | Low                 | Low                    | High                  | Low                | High                        | High               | High                | Low        | High         |
| Phillips 2018     | Low                 | Unclear                | Low                   | Unclear            | Low                         | Low                | Unclear             | Low        | Unclear      |
| Pilu 2007         | Unclear             | Unclear                | Unclear               | Unclear            | Unclear                     | Low                | High                | Low        | High         |
| Prakhinkit 2014   | Low                 | Low                    | Unclear               | Unclear            | Unclear                     | Low                | Unclear             | Low        | Unclear      |
| Prathikanti 2017  | Low                 | Low                    | High                  | High               | High                        | Low                | Low                 | Low        | High         |
| Puterman 2022     | Low                 | Low                    | Unclear               | Unclear            | Unclear                     | Low                | Low                 | Low        | Unclear      |
| Rashidi 2013      | Unclear             | Unclear                | Unclear               | Unclear            | Unclear                     | Unclear            | Unclear             | Unclear    | Unclear      |
| Ravindran 2021    | Low                 | Unclear                | High                  | Unclear            | Low                         | Low                | Unclear             | High       | High         |
| Roh 2020          | Low                 | Low                    | Low                   | High               | Low                         | Low                | Unclear             | Low        | High         |
| Roshan 2011       | Unclear             | Unclear                | Unclear               | Unclear            | Unclear                     | High               | Low                 | Low        | High         |

| Author, Year        | Sequence generation | Allocation concealment | Blinding participants | Blinding personnel | Blinding outcome assessment | Incomplete outcome | Selective reporting | Other bias | Overall bias |
|---------------------|---------------------|------------------------|-----------------------|--------------------|-----------------------------|--------------------|---------------------|------------|--------------|
| Roy 2018            | Unclear             | Unclear                | High                  | High               | High                        | Low                | Unclear             | Low        | High         |
| Sadeghi 2006        | Unclear             | Unclear                | High                  | High               | High                        | Unclear            | Low                 | Low        | High         |
| Salchow 2021        | Low                 | Unclear                | High                  | Unclear            | Unclear                     | High               | Low                 | Low        | High         |
| Salehi 2016         | Low                 | Low                    | High                  | Low                | High                        | Low                | High                | Low        | High         |
| Sarubin 2014        | Unclear             | Unclear                | Unclear               | Unclear            | Unclear                     | Unclear            | Unclear             | Unclear    | Unclear      |
| Schneider 2016      | Low                 | Low                    | High                  | High               | High                        | Low                | High                | High       | High         |
| Schuch 2011         | Unclear             | Unclear                | Unclear               | Unclear            | Unclear                     | Low                | Unclear             | Low        | Unclear      |
| Schuch 2015         | Unclear             | Low                    | High                  | High               | Low                         | Low                | Low                 | Low        | High         |
| Schuver 2016        | Low                 | Unclear                | High                  | Low                | High                        | Unclear            | Low                 | Low        | High         |
| Setaro 1986         | Unclear             | Unclear                | Unclear               | Unclear            | High                        | High               | Unclear             | High       | High         |
| Sexton 1989         | Unclear             | Unclear                | Unclear               | Unclear            | High                        | High               | Unclear             | Low        | High         |
| Shachar-Malach 2015 | Low                 | Low                    | High                  | Unclear            | Low                         | Low                | Low                 | Low        | High         |
| Shahidi 2011        | Unclear             | Unclear                | Unclear               | Unclear            | High                        | High               | Unclear             | Low        | High         |
| Sims 2005           | Low                 | Low                    | Unclear               | Unclear            | Unclear                     | Low                | Unclear             | Low        | Unclear      |
| Sims 2009           | Low                 | Low                    | Unclear               | Unclear            | High                        | Low                | Unclear             | High       | High         |
| Singh 1996          | Low                 | Unclear                | Low                   | High               | Low                         | Low                | Unclear             | High       | High         |
| Singh 1997          | Low                 | Low                    | Unclear               | Unclear            | High                        | Low                | Unclear             | Low        | High         |
| Singh 2001          | Low                 | Low                    | Unclear               | Unclear            | Unclear                     | Unclear            | Unclear             | Low        | Unclear      |
| Singh 2005          | Low                 | Low                    | Low                   | Unclear            | Low                         | Low                | Unclear             | Low        | Unclear      |
| Siqueira 2016       | Low                 | Unclear                | Unclear               | Low                | High                        | Unclear            | Unclear             | High       | High         |
| Sjösten 2008        | Low                 | Low                    | Unclear               | Unclear            | Unclear                     | Low                | High                | Low        | High         |
| Streeter 2017       | Low                 | Low                    | Unclear               | Unclear            | Unclear                     | Low                | Unclear             | Low        | Unclear      |
| Strom 2013          | Low                 | Low                    | High                  | High               | High                        | High               | Low                 | Low        | High         |
| Sujatha 2019        | Unclear             | Unclear                | Unclear               | Unclear            | High                        | Unclear            | Unclear             | High       | High         |
| Sun 2022a           | Low                 | Low                    | High                  | Unclear            | Low                         | Low                | High                | Low        | High         |
| Sun 2022b           | Unclear             | Unclear                | High                  | Unclear            | Low                         | Low                | Unclear             | Low        | High         |
| Szuhany 2018        | Low                 | Low                    | Unclear               | Unclear            | Unclear                     | Low                | Unclear             | Low        | Unclear      |
| Szuhany 2020        | Unclear             | Unclear                | Unclear               | Unclear            | Low                         | Low                | Low                 | Low        | Unclear      |

| Author, Year    | Sequence generation | Allocation concealment | Blinding participants | Blinding personnel | Blinding outcome assessment | Incomplete outcome | Selective reporting | Other bias | Overall bias |
|-----------------|---------------------|------------------------|-----------------------|--------------------|-----------------------------|--------------------|---------------------|------------|--------------|
| Taheri 2018     | Unclear             | Unclear                | Unclear               | Unclear            | Unclear                     | Low                | Unclear             | Low        | Unclear      |
| Tolahunase 2018 | Low                 | Low                    | High                  | Unclear            | Low                         | Low                | Unclear             | Low        | High         |
| Tsang 2006      | Unclear             | Unclear                | Unclear               | Unclear            | Low                         | Unclear            | Unclear             | High       | High         |
| Uebelacker 2016 | Unclear             | Unclear                | Unclear               | Unclear            | High                        | High               | Unclear             | Low        | High         |
| Uebelacker 2017 | Low                 | Low                    | High                  | High               | Low                         | Low                | Low                 | Low        | High         |
| Veale 1992      | Unclear             | Unclear                | Unclear               | Unclear            | High                        | High               | Unclear             | Low        | High         |
| Verrusio 2014   | Low                 | Low                    | High                  | Unclear            | High                        | Low                | Unclear             | Low        | High         |
| Vickers 2009    | Low                 | Low                    | Unclear               | Unclear            | Unclear                     | Low                | Unclear             | Low        | Unclear      |
| Vieira 2007     | Unclear             | Unclear                | High                  | Unclear            | Unclear                     | Low                | High                | Low        | High         |
| Vollbehrr 2022  | Low                 | Low                    | High                  | Low                | Low                         | High               | Low                 | Low        | High         |
| Wadden 2014     | Low                 | Low                    | Unclear               | Unclear            | High                        | Low                | Low                 | High       | High         |
| Walter 2023     | Low                 | Unclear                | Unclear               | Unclear            | Low                         | Low                | Low                 | Low        | Unclear      |
| Weinstock 2016  | Low                 | Unclear                | High                  | High               | Low                         | High               | Unclear             | Low        | High         |
| Whiddon 2013    | Unclear             | Unclear                | High                  | Unclear            | High                        | Low                | Unclear             | Low        | High         |
| Williams 2008   | Unclear             | Low                    | Unclear               | Unclear            | Low                         | Unclear            | Unclear             | Low        | Unclear      |
| Woolery 2004    | Unclear             | Unclear                | Unclear               | Unclear            | High                        | Unclear            | Unclear             | Low        | High         |
| Wunram 2018     | Low                 | Low                    | High                  | High               | High                        | High               | Low                 | High       | High         |
| Yagli 2015      | High                | Unclear                | Unclear               | Unclear            | Unclear                     | Low                | Unclear             | Low        | High         |
| Yang 2021       | Low                 | Low                    | High                  | Unclear            | Unclear                     | Low                | Low                 | Low        | High         |
| Yeung 2012      | Low                 | Low                    | High                  | High               | Low                         | Low                | Unclear             | Low        | High         |
| Yeung 2017      | Low                 | Unclear                | High                  | Unclear            | Unclear                     | High               | Low                 | Low        | High         |
| Zeibig 2021     | Low                 | Low                    | High                  | High               | Low                         | Unclear            | Low                 | Low        | High         |
| Zhao 2023       | Low                 | Unclear                | High                  | Unclear            | Low                         | Low                | Unclear             | Low        | High         |
| Zou 2005        | Unclear             | Unclear                | Unclear               | Unclear            | Unclear                     | Low                | Unclear             | Unclear    | Unclear      |



## S6 Sensitivity Analyses for Risk of Bias

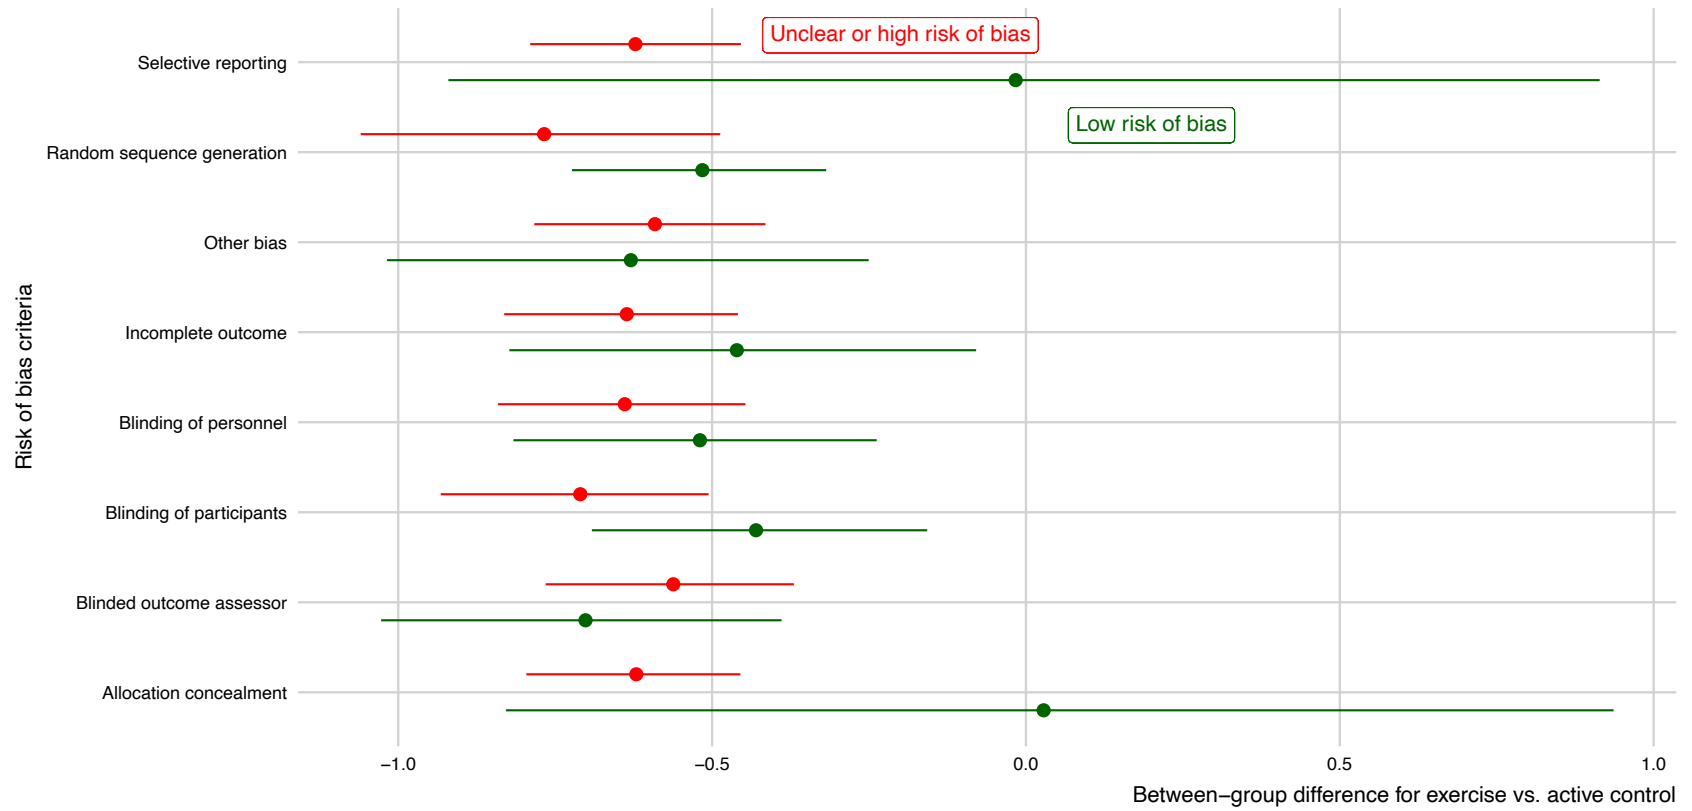

**S7 Forest plot of each data point informing each arm**

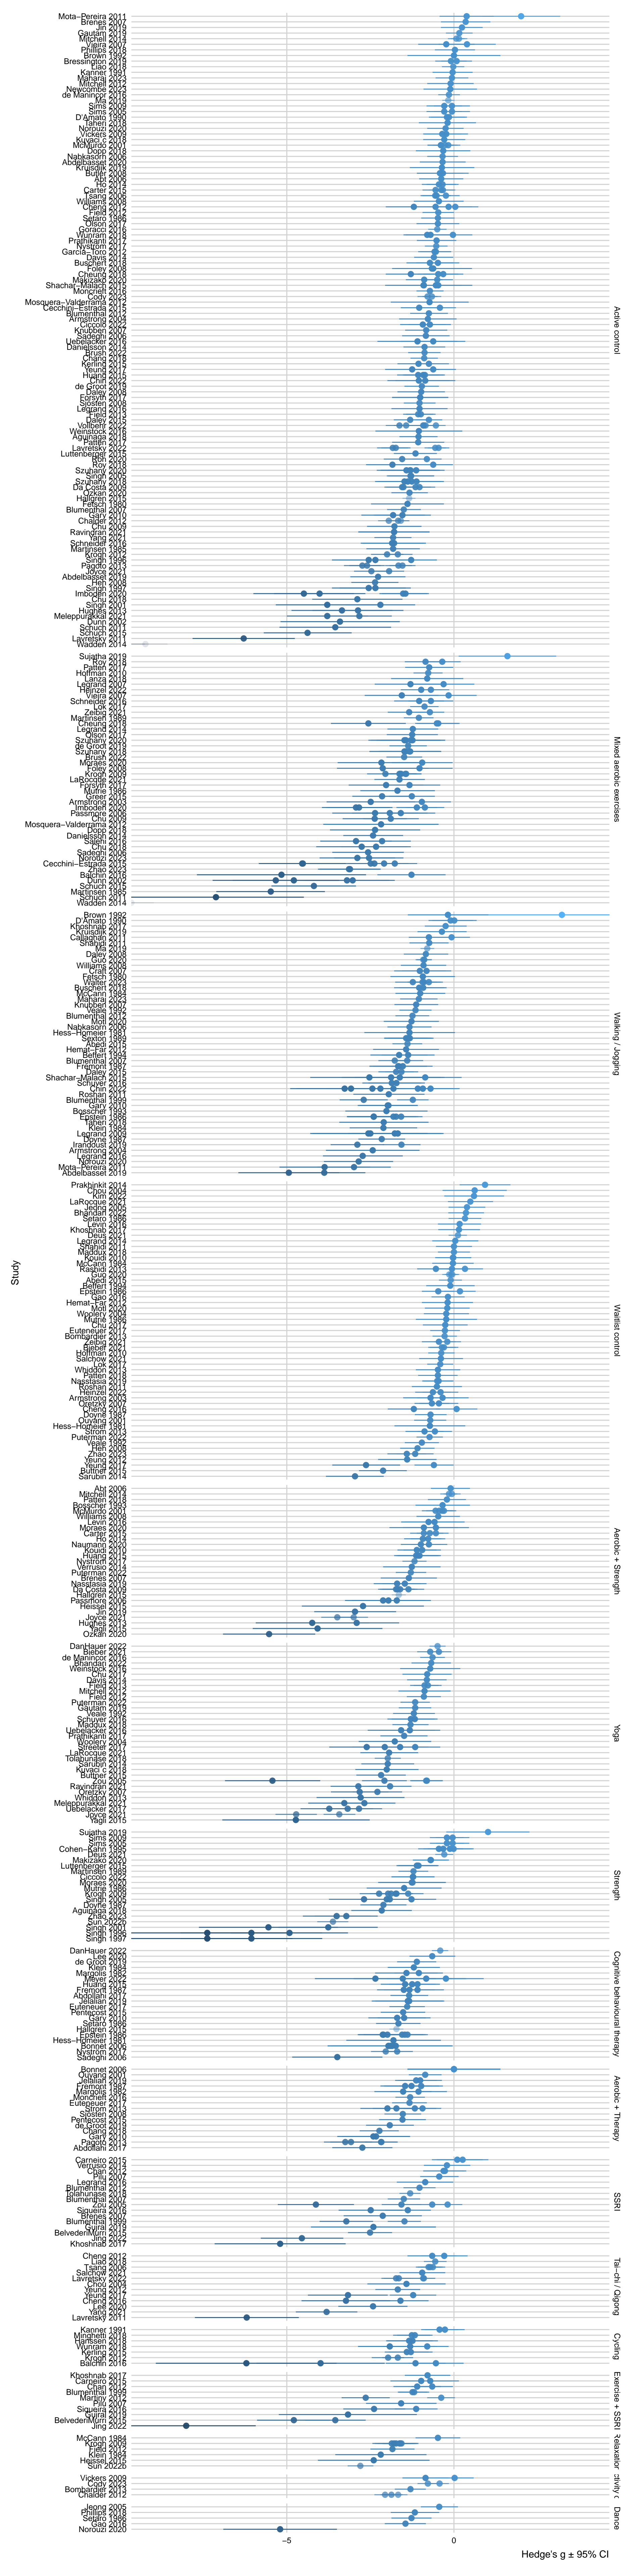

Hedge's g ± 95% CI

S8 Acceptability by treatment arm

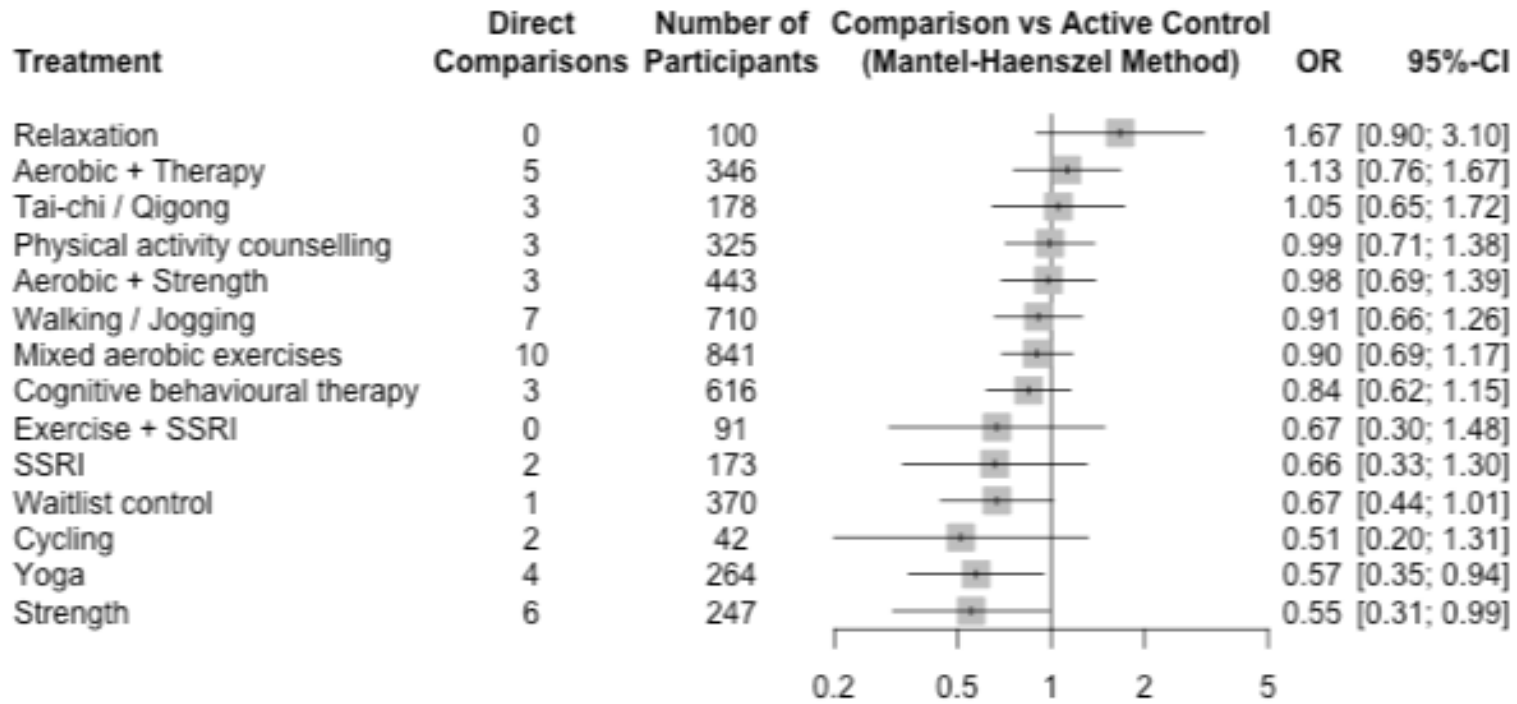

**S9 Density plots for  $R^2$  from models with interactions between treatment and moderators**

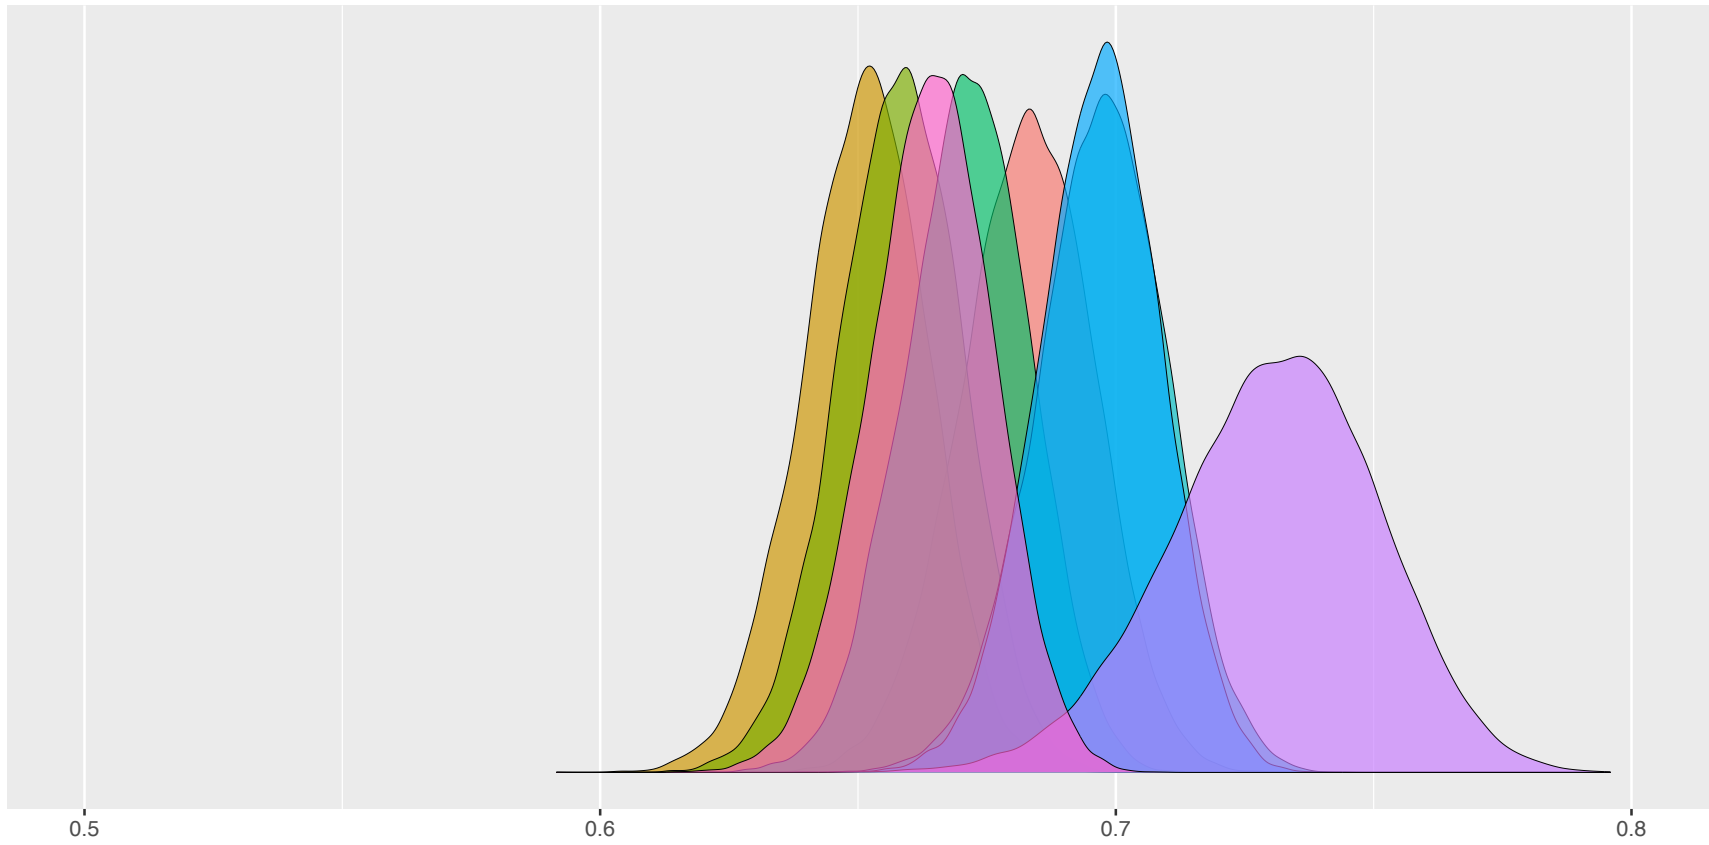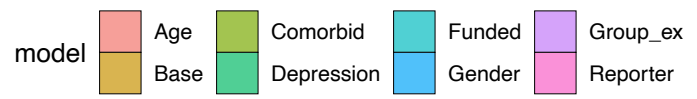

**S10 Weekly dose in METs has limited prediction on outcomes**

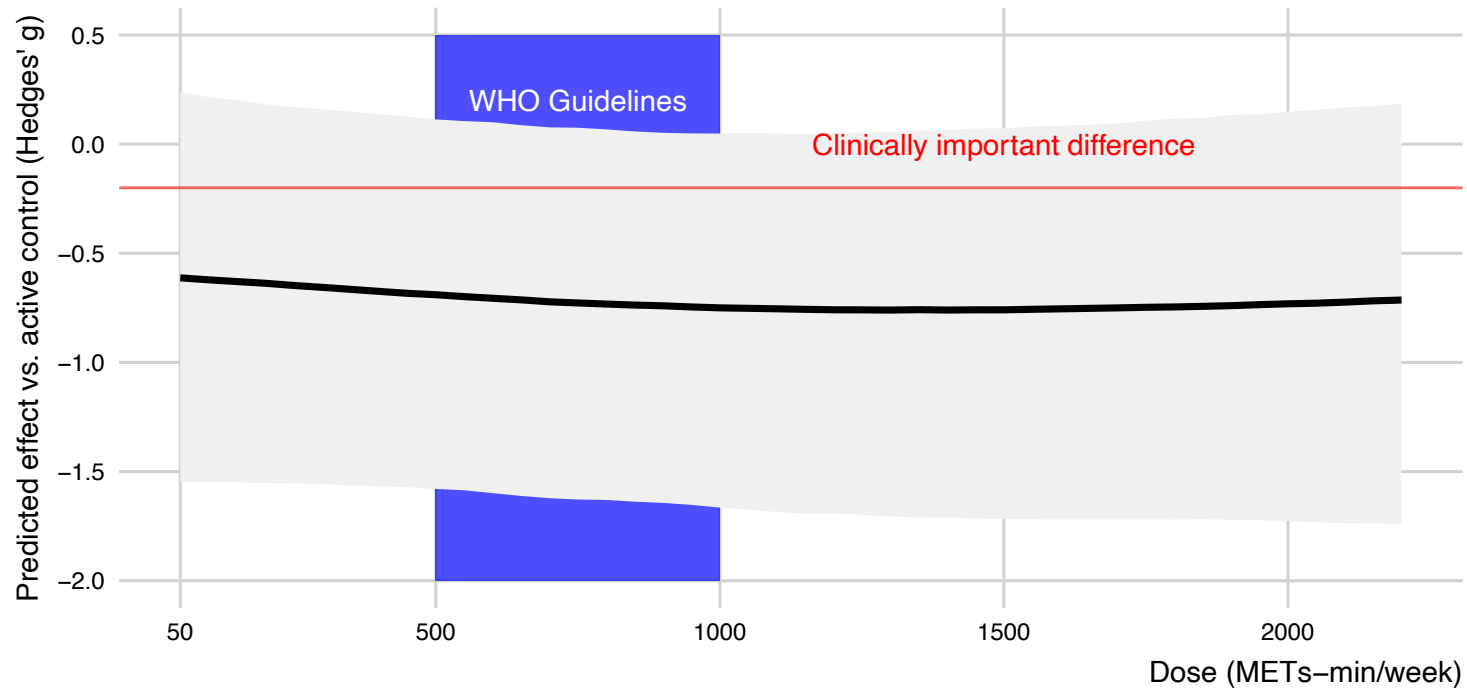

**S11 Moderation for intervention effects by length of intervention in weeks**

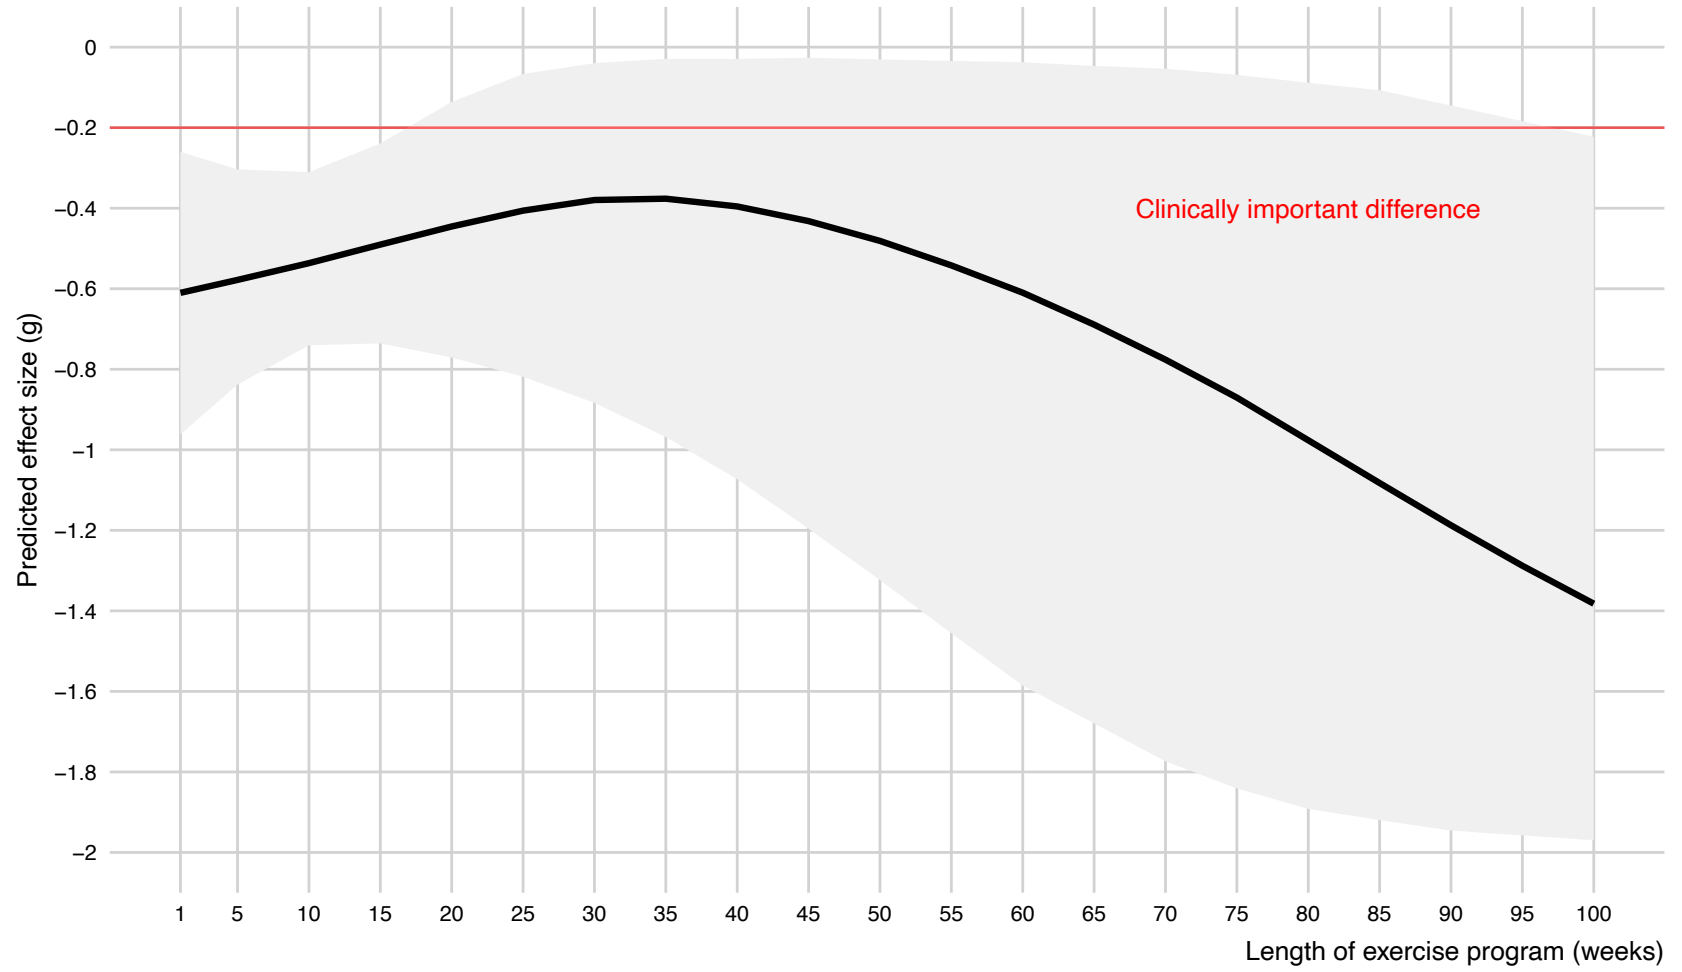

### S12 Moderation for intervention effects by measurement lag

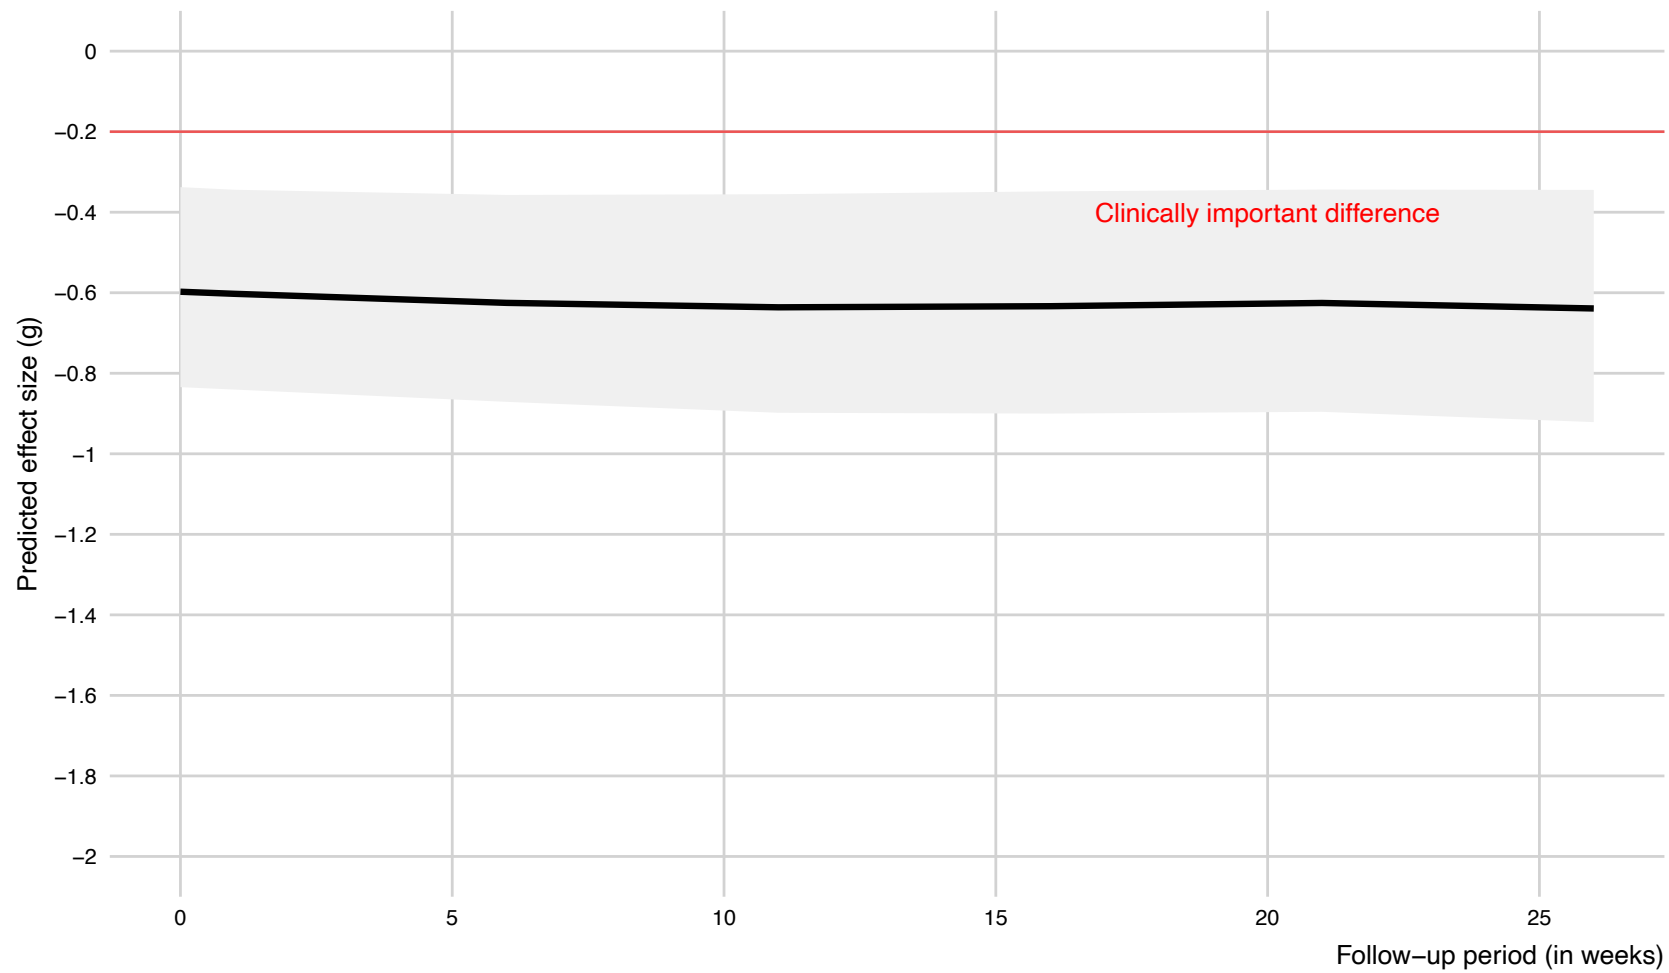



**S13 Behaviour Change Techniques of Each Exercise Arm**

See file on <https://osf.io/nzw6u/>

**S14 Moderation for level of autonomy described in the method**

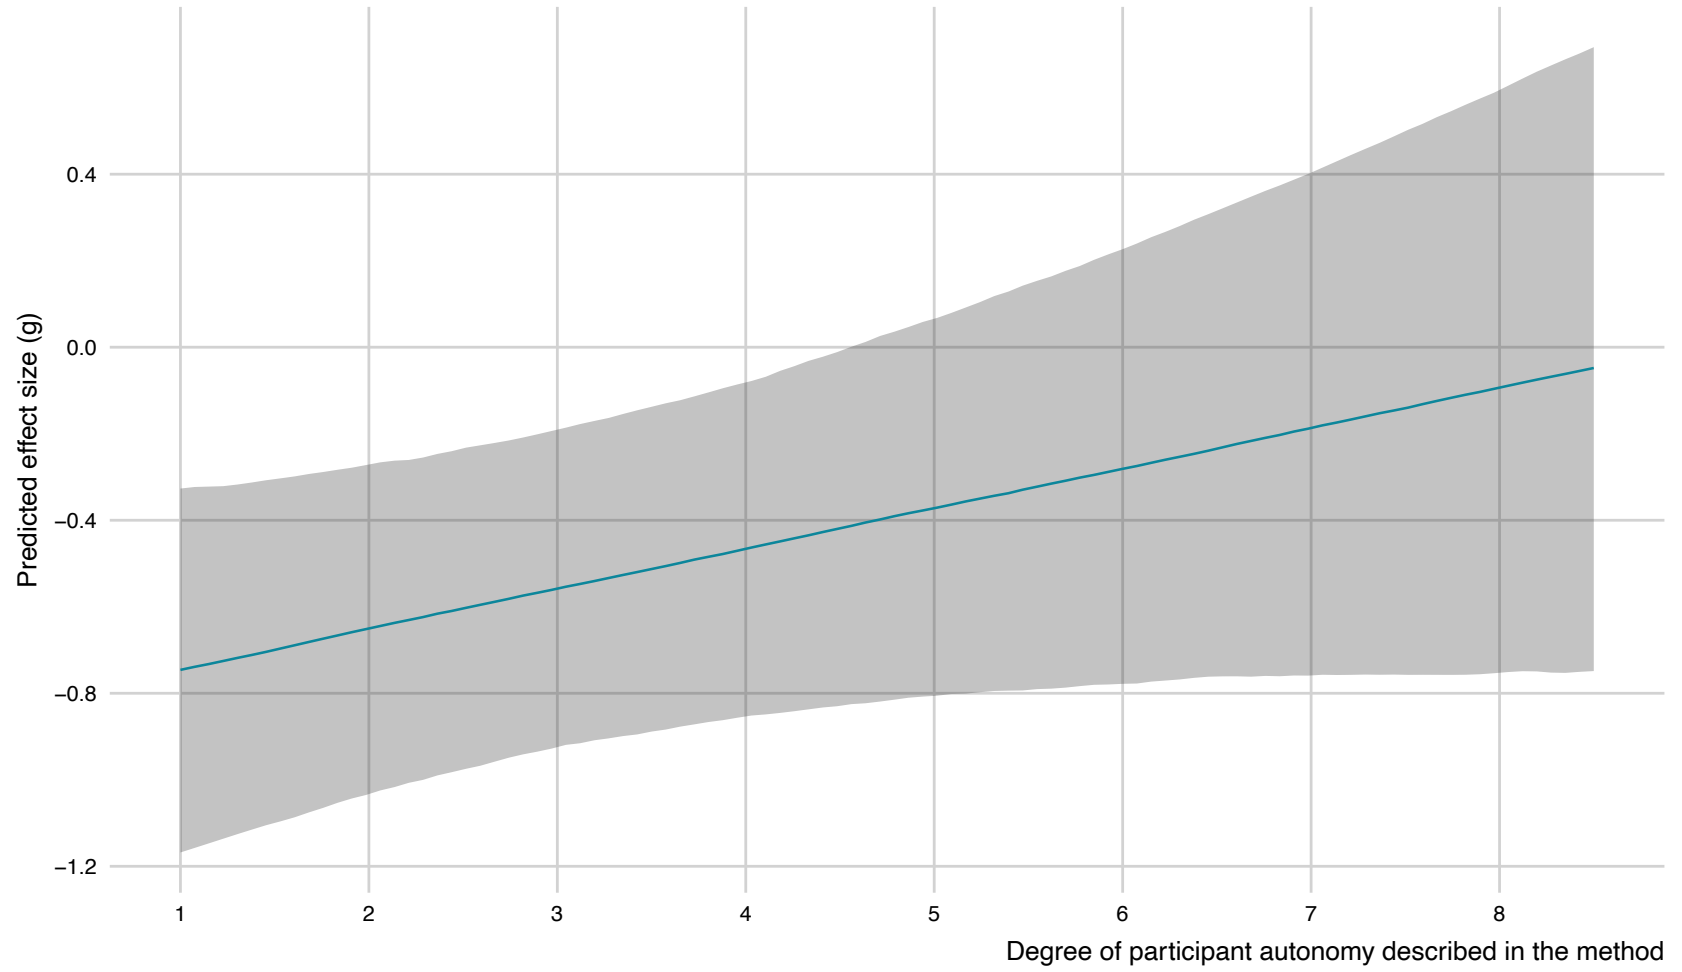

### S15 Moderation by group exercise

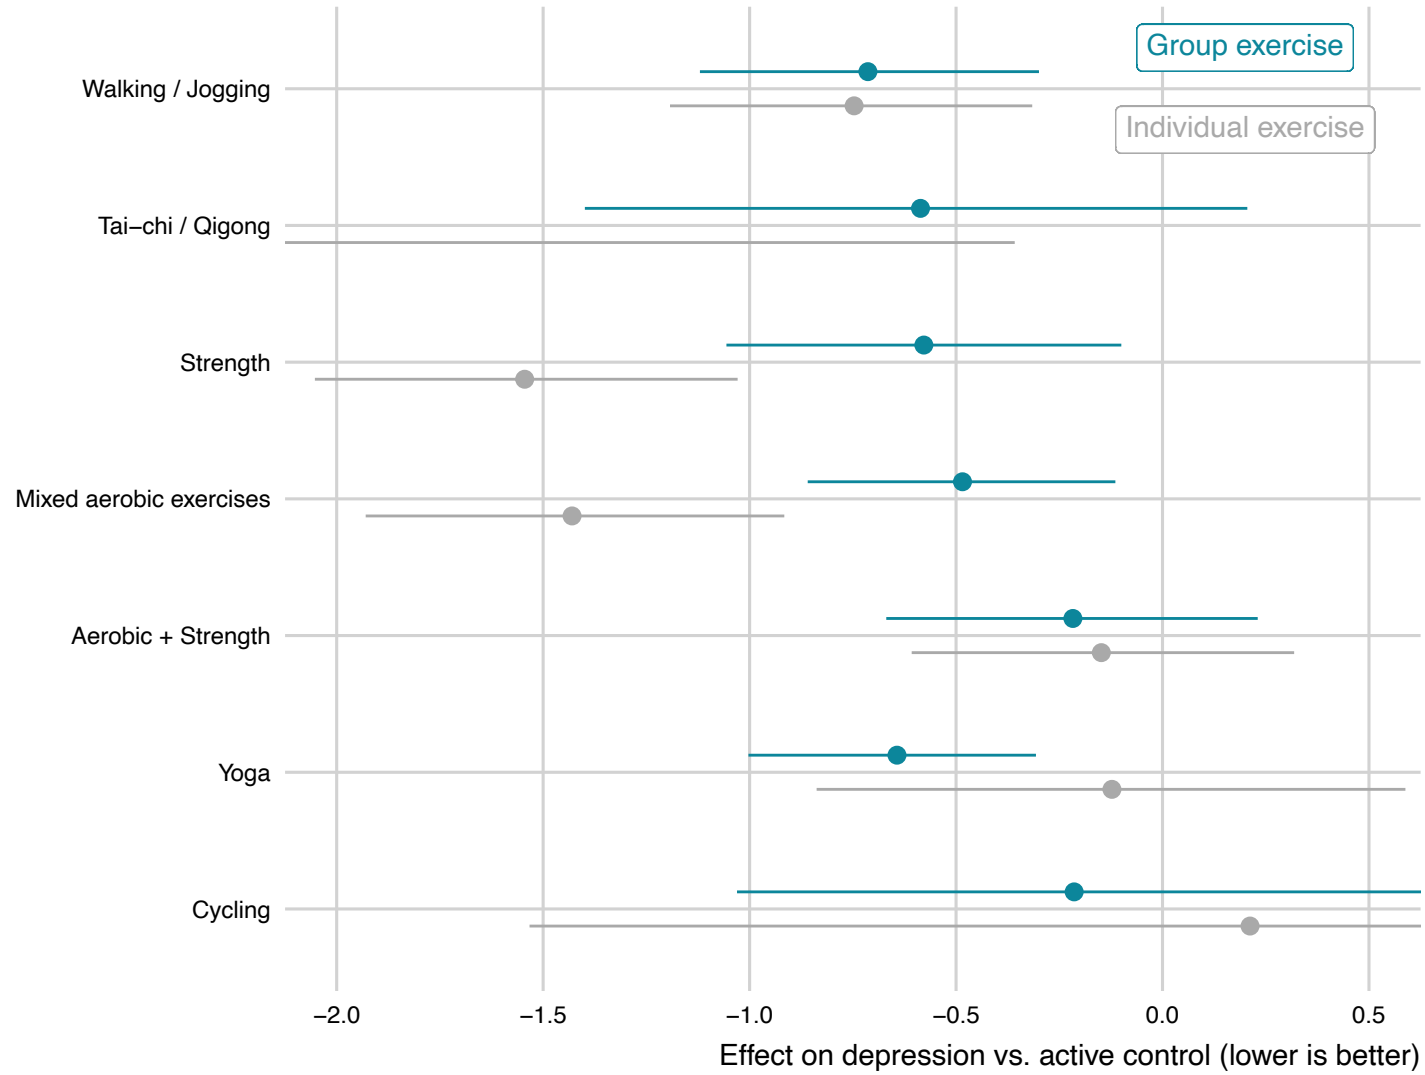

S16 Funnel plot for all exercise arms vs active control

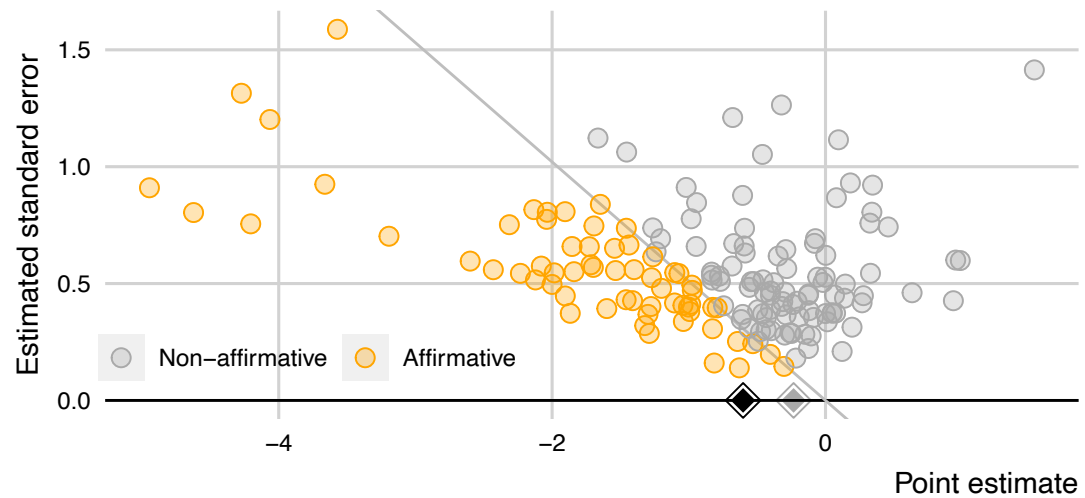

Supplement: noem075847.ww.pdf [file noem075847.ww.pdf]
